# Supplementary material for: Membrane-associated proteomics of chickpea identifies Sad1/UNC-84 protein (CaSUN1), a novel component of dehydration signaling
Source: PubMed Central journal article supplement — Sci Rep. 2014 Feb 28;4:4177. doi: 10.1038/srep04177 (PMC3937784; doi:10.1038/srep04177), 2014-02-28
Supplement: srep04177-s1.pdf [file srep04177-s1.pdf]

# **Membrane-associated proteomics of chickpea identifies Sad1/UNC-84 protein (CaSUN1), a novel component of dehydration signaling**

**Dinesh Kumar Jaiswal, Poonam Mishra, Pratigya Subba, Divya Rathi, Subhra Chakraborty\* and Niranjana Chakraborty<sup>§</sup>**

National Institute of Plant Genome Research, Aruna Asaf Ali Marg, New Delhi-110067, India.

## **<sup>§</sup>Correspondence:**

Dr. Niranjana Chakraborty  
National Institute of Plant Genome Research  
Aruna Asaf Ali Marg, New Delhi-110067, India.

**E-mail:** nchakraborty@nipgr.ac.in

**Tel:** 00-91-11-26735178

**Fax:** 00-91-11-26716658

## **\*Correspondence:**

Dr. Subhra Chakraborty  
National Institute of Plant Genome Research  
Aruna Asaf Ali Marg, New Delhi-110067, India.

**E-mail:** Subhrac@hotmail.com

**Tel:** 00-91-11-26735178

**Fax:** 00-91-11-26716658

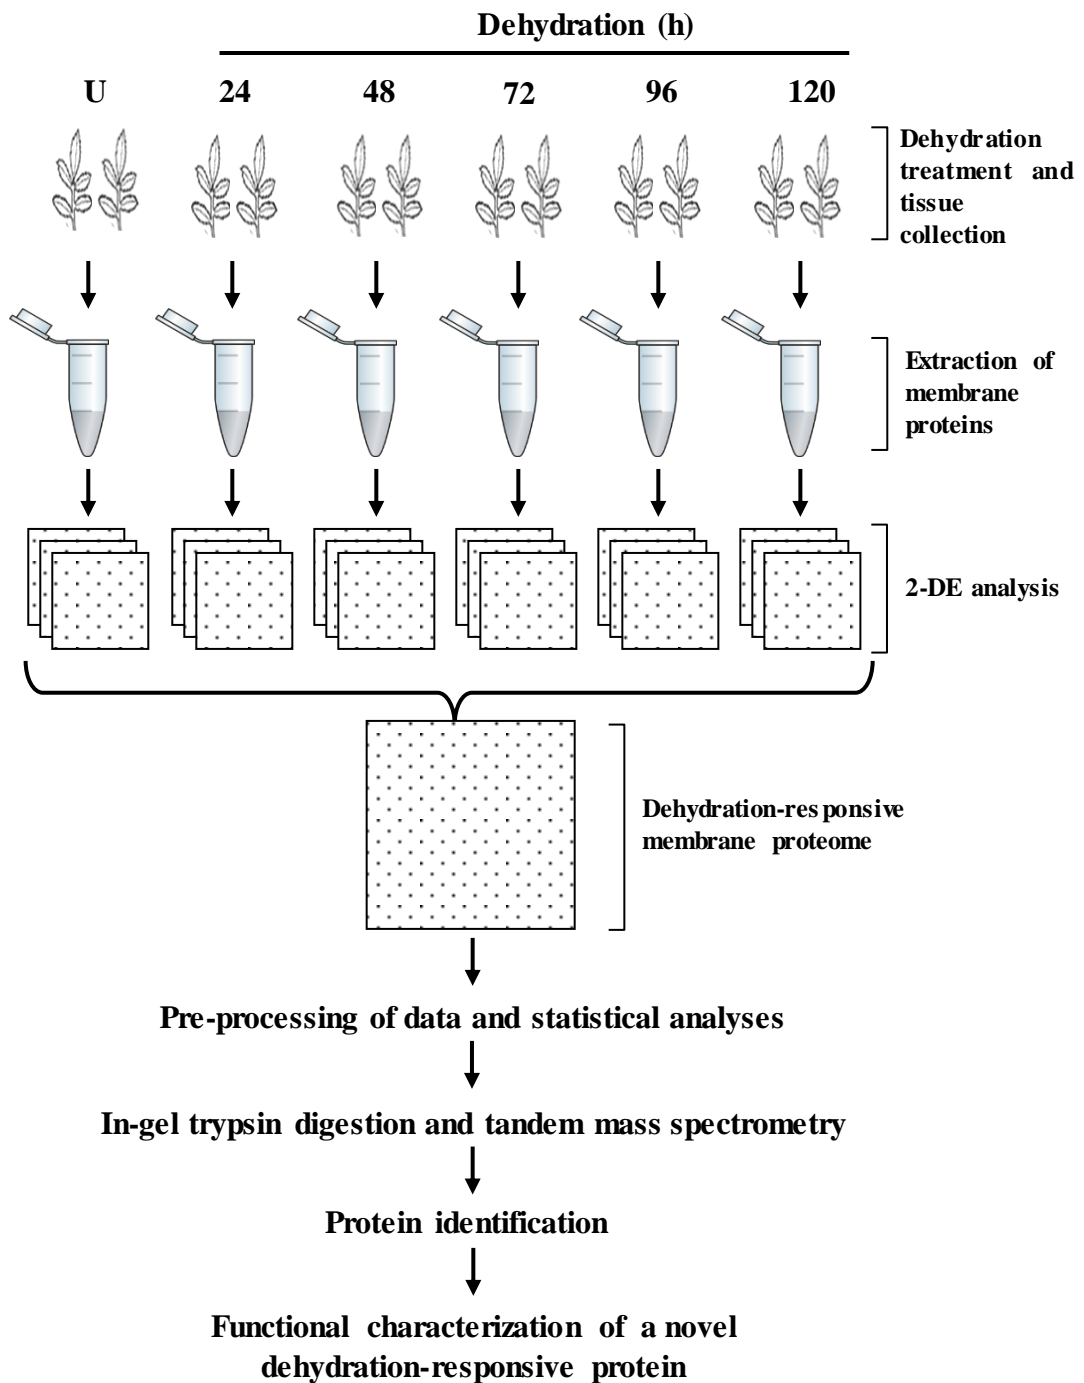

**Supplementary Fig. S1.** Experimental work flow used for analyzing the membrane proteome from the aerial tissue of chickpea and downstream analyses. The detailed experimental procedure is illustrated in “SI Materials methods” section. U represents the unstressed condition.

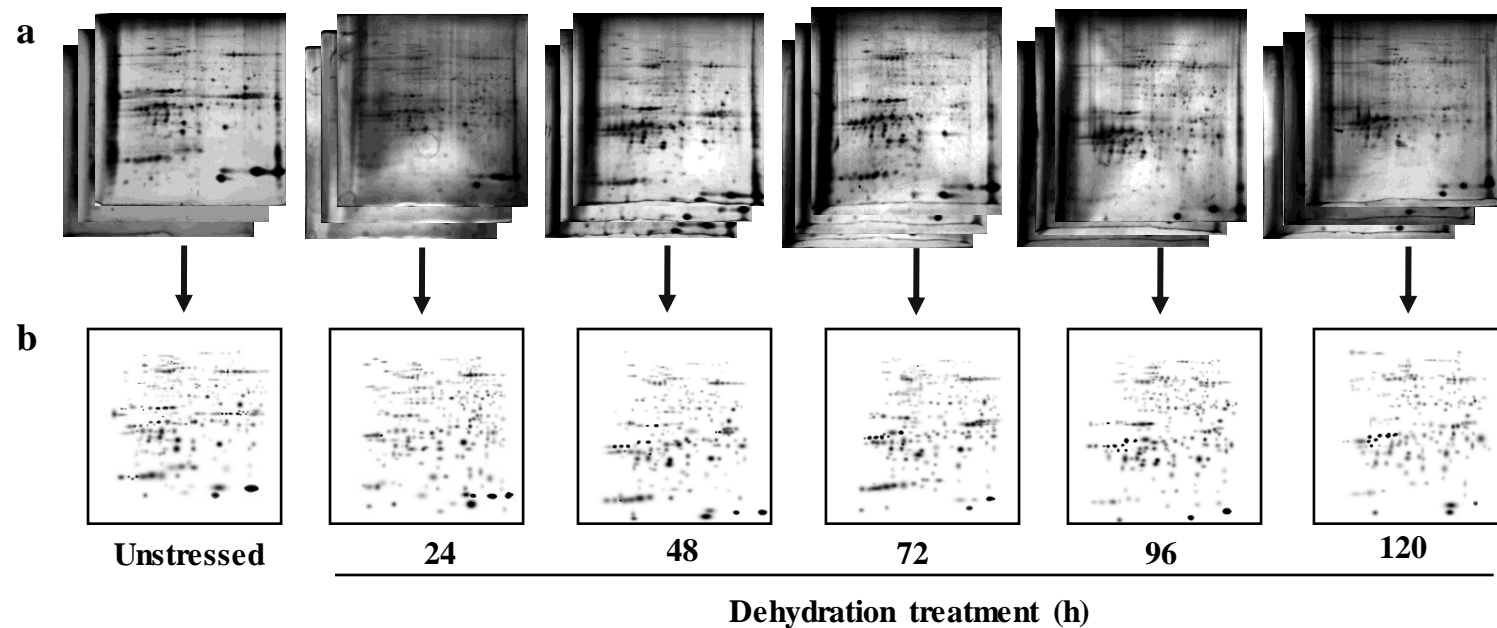

**Supplementary Fig. S2. Dehydration-responsive comparative proteome of chickpea membrane and the representative 2-D gels.** Three-week-old chickpea seedlings were subjected to dehydration and tissue were harvested every 24 h until 120 h. The membrane proteins were isolated from the unstressed and stressed tissue from each time point and 2-DE was performed. Three replicate gels for each time point (a) were computationally combined using PDQuest (version 7.2.0) software to generate the standard gels (b).

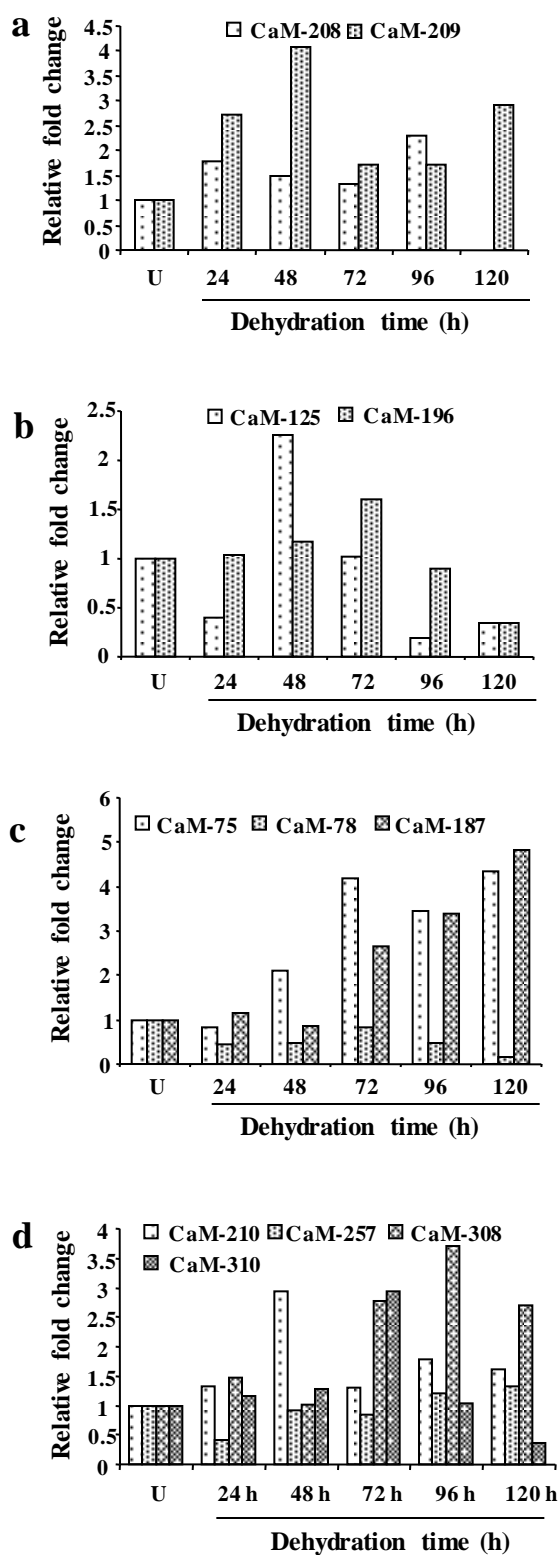

**Supplementary Fig. S3. Relative abundance of few of the redundant DRPs. The expression profiles of the following proteins are represented. (a)** Putative 60S acidic ribosomal protein P0, **(b)** Oxygen-evolving enhancer protein 1, **(c)** chlorophyll a/b binding protein type III, and **(d)** fructose-bisphosphate aldolase. The y-axis represents the fold change in expression of the protein across all the time points. The background value averaged across the replicates for a time point was used to calculate the fold changes. U represents unstressed condition.

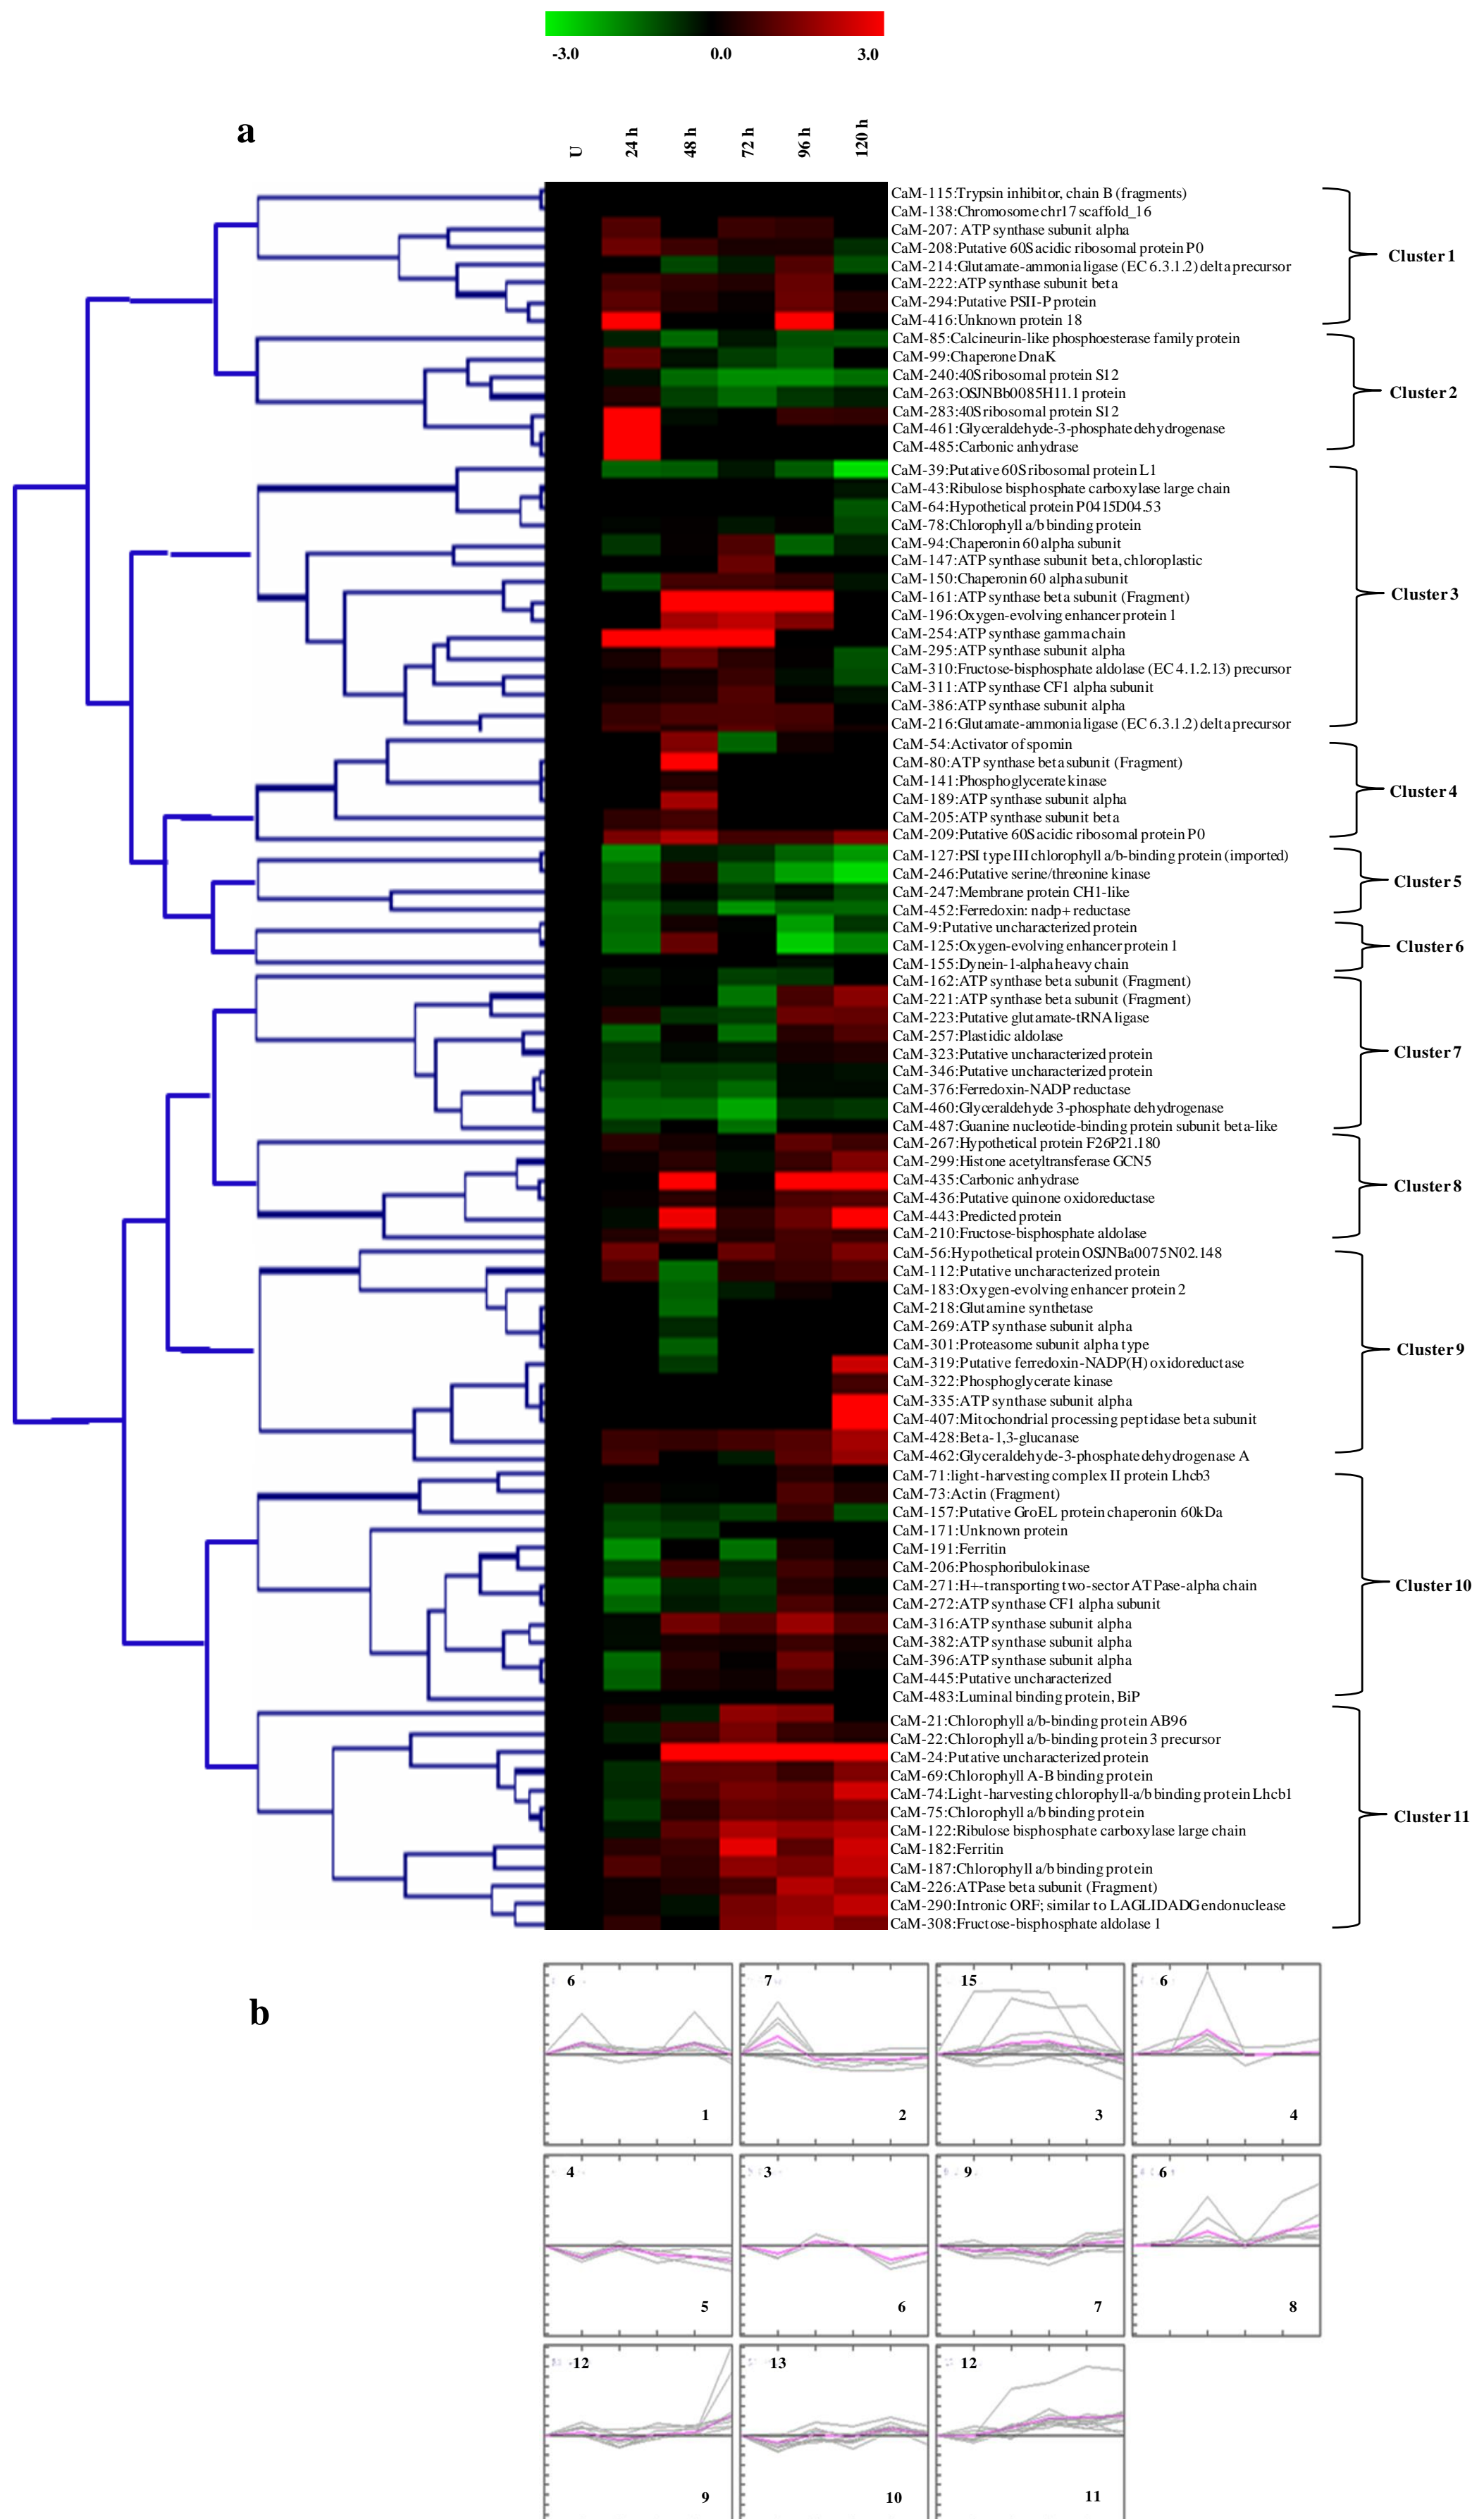

**Supplementary Fig. S4. Hierarchical expression clustering of the identified DRPs in the membrane fraction of chickpea.** Based on the expression profile, the DRPs were grouped into 11 clusters. The SOTA cluster tree (heat map) is shown at the top (a), and the expression graphs are shown below (b). Each DRP is represented by a single row of colored box and each time point by a single column. In the expression graph, the number of proteins in each cluster is given in the left upper corner and the cluster number is given in the right lower corner. U represents unstressed condition.

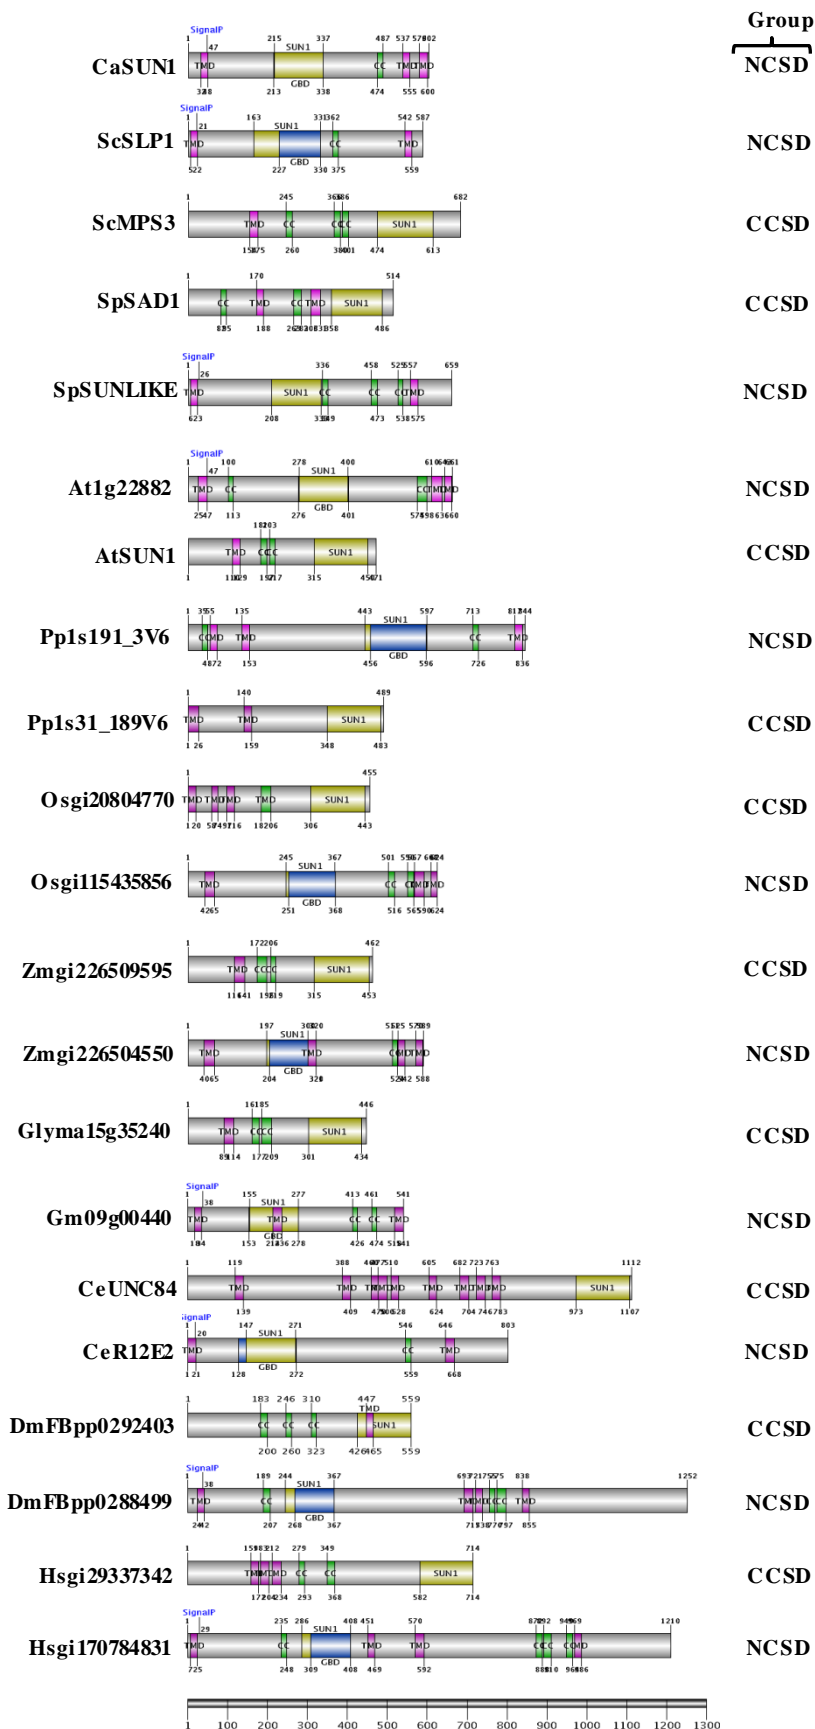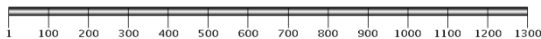

**Supplementary Fig. S5. Analysis of plant and non-plant Sad1/UNC-84 (SUN) domain protein family.** *In silico* analysis of putative SUN domain proteins from different organisms showing Sad1/UNC-84 (SUN) domain (InterProScan), transmembrane domain (TMPred), coiled-coil domain (Coils), galactose binding domain (InterProScan) and N-terminal signal peptide (SignalP). CCSD and NCSD denotes Canonical C-terminal SUN Domain and Non-Canonical SUN Domain, respectively.

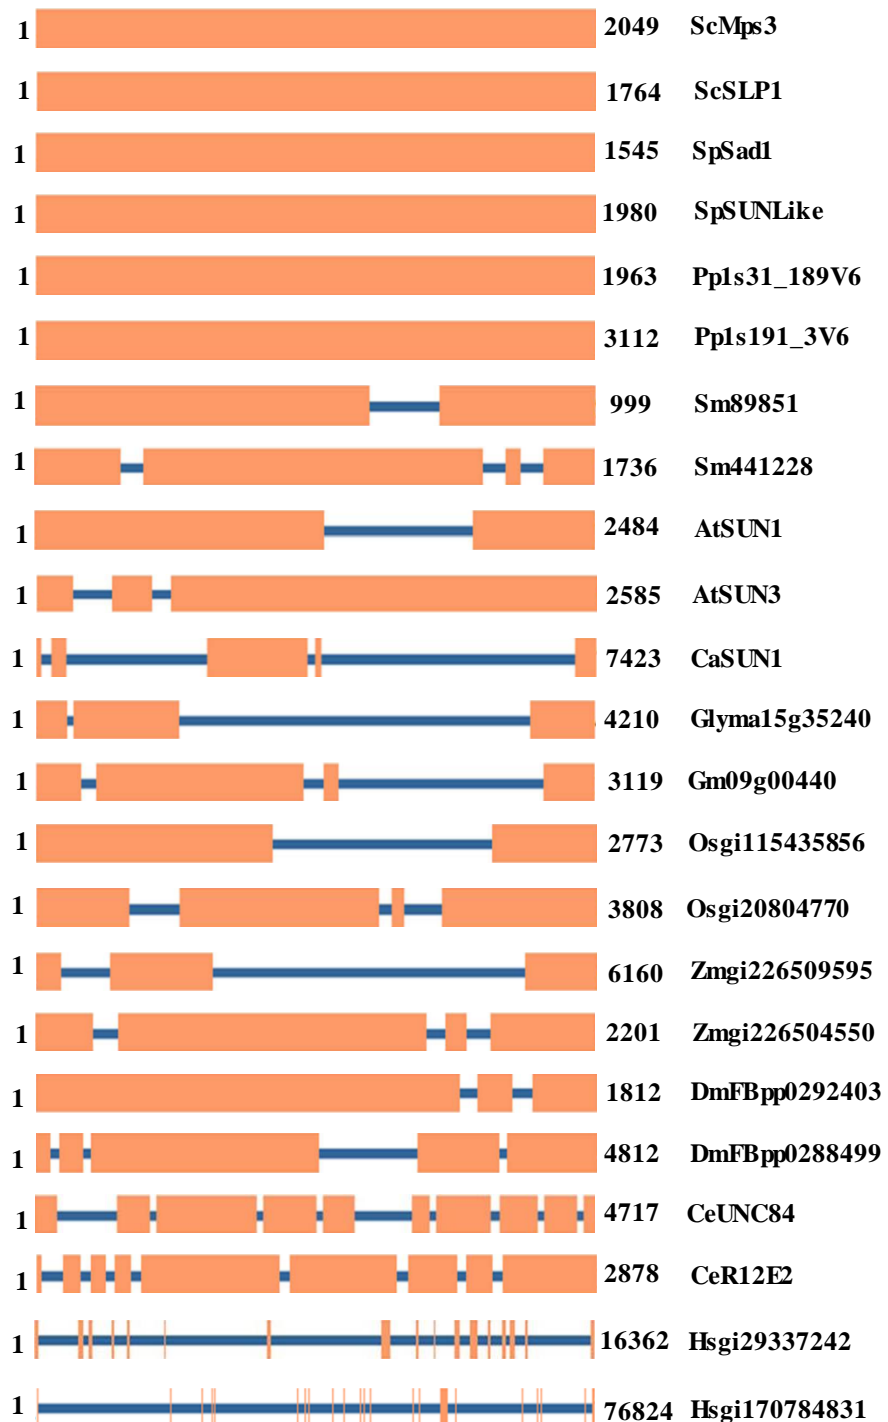

**Supplementary Fig. S6. Genomic organization of SUN protein gene family.** A diagrammatic representation of the gene structures of SUN protein gene family of different taxa. The diagrams were drawn using SPIDEY program <http://www.ncbi.nlm.nih.gov/spidey/> on the basis of alignments of cDNA to genomic DNA sequences. Exons are represented by filled boxes, while introns are represented by diagonal lines.

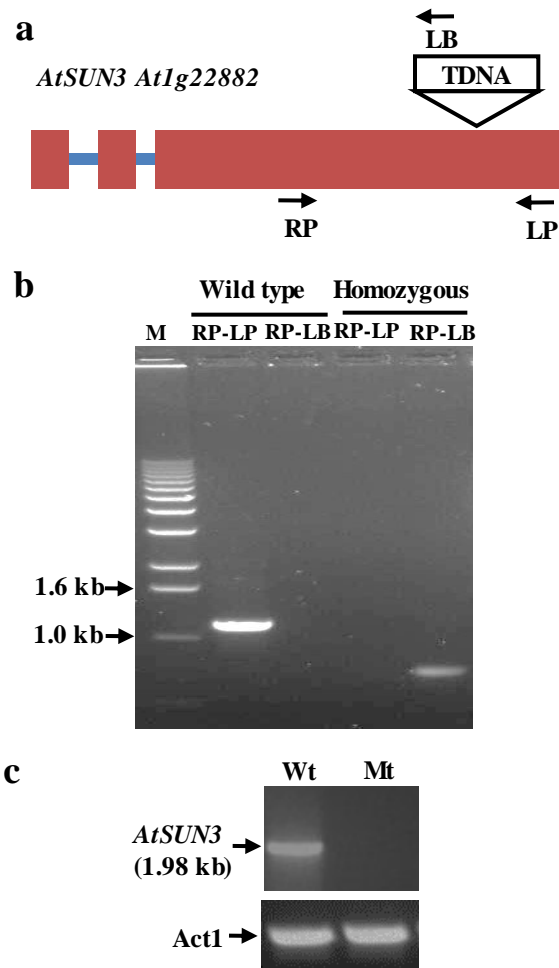

**Supplementary Fig. S7. Identification of homozygous *AtSUN3* T-DNA mutants.** **a.** Schematic representation of the *AtSUN3* allele, with the T-DNA insertion shown as inverted triangle. Filled boxes indicate coding regions. **b.** Genotyping of wild type and *AtSUN3* mutant. **c.** RT-PCR analysis for the presence of full-length *AtSUN3* transcript. M: 1 kb DNA ladder, RP and LP: gene specific right primer and left primer, LB: T-DNA left border primer, Wt: wild type, Mt: *AtSUN3* mutant. Primers used in genotyping PCR and RT-PCR are listed in Supplementary Table S9.



**Supplementary Table S1.** Reproducibility of two-dimensional gels.

| <b>Time (h)</b> | <b>Average No of spots <sup>a</sup></b> | <b>High quality spots <sup>b</sup></b> | <b>Reproducibility (%)</b> |
|-----------------|-----------------------------------------|----------------------------------------|----------------------------|
| Control         | 296                                     | 280                                    | 94.59                      |
| 24              | 290                                     | 277                                    | 95.51                      |
| 48              | 243                                     | 228                                    | 93.82                      |
| 72              | 246                                     | 236                                    | 95.93                      |
| 96              | 278                                     | 258                                    | 92.80                      |
| 120             | 214                                     | 201                                    | 93.92                      |
| Total           | 1567                                    | 1480                                   | 94.45                      |

<sup>a</sup> Average number of spots present in three replicate gels of each time points

<sup>b</sup> Spots having a quality score more than 30 assigned by PDQuest (version 7.2.0)

**Supplementary Table S2.** List of dehydration-responsive membrane proteins identified by MS/MS analysis.

| Spot No <sup>a</sup> | Identification                                       | gi No <sup>b</sup> | Score | NP <sup>c</sup> | % Coverage | The MW/pI   | Exp MW/pI    | Time Kinetics <sup>d</sup>                                                            | GO annotation                                                                                                                                                                                                                                                                                                                                                                                                                                                                                                                                                          |
|----------------------|------------------------------------------------------|--------------------|-------|-----------------|------------|-------------|--------------|---------------------------------------------------------------------------------------|------------------------------------------------------------------------------------------------------------------------------------------------------------------------------------------------------------------------------------------------------------------------------------------------------------------------------------------------------------------------------------------------------------------------------------------------------------------------------------------------------------------------------------------------------------------------|
|                      |                                                      |                    |       |                 |            |             |              | U 24 48 72 96 120                                                                     |                                                                                                                                                                                                                                                                                                                                                                                                                                                                                                                                                                        |
| CaM-246!             | Putative serine/threonine kinase                     | 110289142          | 71    | 11              | 25         | 50.40/9.89  | 25.76/5.30   | 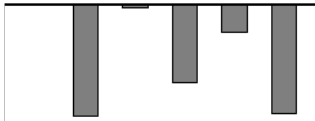   | plastid                                                                                                                                                                                                                                                                                                                                                                                                                                                                                                                                                                |
| CaM-85!              | Calcineurin-like phosphoesterase family protein      | 22329383           | 63    | 11              | 29         | 43.99/5.36  | 42.64/4.72   |    | peroxisome, hydrolase activity                                                                                                                                                                                                                                                                                                                                                                                                                                                                                                                                         |
| CaM-487*             | Guanine nucleotide-binding protein subunit beta-like | 3023847            | 297   | 7               | 30         | 31.834/6.44 | 36.411/7.689 |    | protein binding                                                                                                                                                                                                                                                                                                                                                                                                                                                                                                                                                        |
| CaM-247¶             | Membrane protein CH1-like                            | 115441379          | 41    | 3               | 2          | 70.30/4.91  | 30.04/5.45   |   | mitochondrion, membrane                                                                                                                                                                                                                                                                                                                                                                                                                                                                                                                                                |
| CaM-299!             | Histone acetyltransferase GCN5                       | 18410098           | 79    | 15              | 26         | 63.48/6.01  | 30.69/5.63   |  | flower development, transferase activity, biosynthetic process, carbohydrate metabolic process, cellular process, secondary metabolic process, response to extracellular stimulus, cell communication, response to stress, response to endogenous stimulus, protein binding, nucleoplasm, biological_process, anatomical structure morphogenesis, multicellular organismal development, DNA binding, response to abiotic stimulus, cellular component organization, cellular protein modification process, sequence-specific DNA binding transcription factor activity |

|          |                                                            |           |     |    |    |                |                |                                                                                       |                                                                                                                                                                                                                                                                               |
|----------|------------------------------------------------------------|-----------|-----|----|----|----------------|----------------|---------------------------------------------------------------------------------------|-------------------------------------------------------------------------------------------------------------------------------------------------------------------------------------------------------------------------------------------------------------------------------|
| CaM-428* | Beta-1,3-glucanase                                         | 116490100 | 80  | 1  | 3  | 36.41/<br>8.82 | 24.76/<br>6.75 | 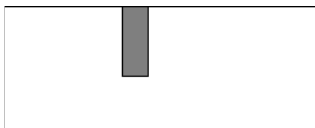   | carbohydrate metabolic process, hydrolase activity, binding                                                                                                                                                                                                                   |
| CaM-483* | Luminal binding protein, BiP                               | 297742397 | 248 | 7  | 6  | 73.31/<br>4.96 | 30.25/<br>6.91 |    | nucleotide binding                                                                                                                                                                                                                                                            |
| CaM-182* | Ferritin                                                   | 224140479 | 50  | 1  | 6  | 16.58/<br>5.14 | 28.10/<br>5.12 |    | cellular homeostasis, catalytic activity, binding, transport, metabolic process                                                                                                                                                                                               |
| CaM-115! | Trypsin inhibitor, chain B (fragments)                     | 3318877   | 144 | 7  | 57 | 19.29/<br>4.79 | 14.86/<br>5.07 |    | enzyme regulator activity, biological_process                                                                                                                                                                                                                                 |
| CaM-191* | Ferritin                                                   | 255637227 | 129 | 2  | 9  | 30.23/<br>5.26 | 30.23/<br>5.23 |    | cellular homeostasis, catalytic activity, binding, transport, metabolic process                                                                                                                                                                                               |
| CaM-271! | H <sup>+</sup> -transporting two-sector ATPase-alpha chain | 114522    | 83  | 13 | 21 | 54.64/<br>5.75 | 69.09/<br>5.38 |  | membrane, intracellular, transport, biosynthetic process, generation of precursor metabolites and energy, nucleobase-containing compound metabolic process, transporter activity, mitochondrion, nucleotide binding, hydrolase activity, plastid, thylakoid, cellular process |
| CaM-94*  | Chaperonin 60 alpha subunit                                | 217074850 | 764 | 17 | 28 | 62.00/<br>5.11 | 72.03/<br>4.7  |  | protein metabolic process, cellular process, cytoplasm, protein binding, nucleotide binding                                                                                                                                                                                   |

|          |                                         |           |     |    |    |                 |                       |                                                                                       |                                                                                             |
|----------|-----------------------------------------|-----------|-----|----|----|-----------------|-----------------------|---------------------------------------------------------------------------------------|---------------------------------------------------------------------------------------------|
| CaM-99*  | Chaperone DnaK                          | 92870233  | 501 | 11 | 15 | 75.10/<br>5.19  | 83.09/<br>4.69        | 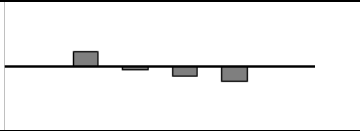   | protein metabolic process, cellular process, protein binding, nucleotide binding            |
| CaM-157* | Putative GroEL protein chaperonin 60kDa | 225435794 | 192 | 4  | 38 | 17.51/<br>10.05 | 45.83/<br>5.00        |    | protein metabolic process, cellular process, cytoplasm, protein binding, nucleotide binding |
| CaM-150! | Chaperonin 60 alpha subunit             | 3790441   | 108 | 12 | 13 | 61.45/<br>5.23  | 57.09/<br>5.12        |    | protein metabolic process, cellular process, cytoplasm, nucleotide bindin                   |
| CaM-73*  | Actin (Fragment)                        | 111610552 | 63  | 1  | 7  | 23.515<br>/4.78 | 26.434<br>1/4.75      |    | N/F                                                                                         |
| CaM-39*  | Putative 60S ribosomal protein L1       | 84468414  | 101 | 3  | 7  | 44.93/<br>10.40 | 51.00/<br>4.29        |    | ribosome, structural molecule activity, translation                                         |
| CaM-240* | 40S ribosomal protein S12               | 255626071 | 54  | 2  | 12 | 15.345<br>/5.50 | 19.260<br>6/5.37      |   | ribosome, structural molecule activity, translation                                         |
| CaM-283* | 40S ribosomal protein S12               | 255626071 | 162 | 3  | 23 | 15.345<br>/5.50 | 19.017<br>3/5.60<br>7 |  | ribosome, structural molecule activity, translation                                         |
| CaM-223! | Putative glutamate-tRNA ligase          | 115443869 | 70  | 14 | 11 | 63.10/<br>6.27  | 74.10/<br>5.23        |  | ATP binding, cytoplasm, glutamate-tRNA ligase activity, glutamyl-tRNA aminoacylation        |

|          |                                                 |           |     |    |    |                 |                  |                                                                                       |                                                                                                                                              |
|----------|-------------------------------------------------|-----------|-----|----|----|-----------------|------------------|---------------------------------------------------------------------------------------|----------------------------------------------------------------------------------------------------------------------------------------------|
| CaM-208* | Putative 60S acidic ribosomal protein P0        | 84468360  | 89  | 2  | 7  | 34.31/<br>5.27  | 40.24/<br>5.10   | 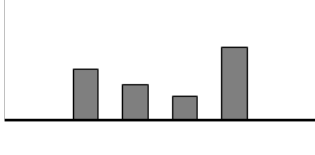   | ribosome, structural molecule activity, cellular process, translation                                                                        |
| CaM-209* | Putative 60S acidic ribosomal protein P0        | 84468360  | 82  | 2  | 7  | 34.31/<br>5.27  | 40.25/<br>5.21   |    | ribosome, structural molecule activity, cellular process, translation                                                                        |
| CaM-407! | Mitochondrial processing peptidase beta subunit | 12802327  | 394 | 20 | 22 | 58.90/<br>6.56  | 70.46/<br>6.03   |    | hydrolase activity, protein metabolic process, catabolic process, binding                                                                    |
| CaM-301* | Proteasome subunit alpha type                   | 224139394 | 199 | 4  | 21 | 27.38/<br>5.59  | 31.39/<br>5.81   |    | cytoplasm, intracellular, protein metabolic process, catabolic process, cellular process, nucleus, hydrolase activity                        |
| CaM-21!  | Chlorophyll a/b-binding protein AB96            | 115773    | 224 | 9  | 22 | 24.36/<br>4.98  | 29.51/<br>4.58   |   | binding, generation of precursor metabolites and energy, photosynthesis, membrane, thylakoid, cellular protein modification process, plastid |
| CaM-187* | Chlorophyll a/b binding protein                 | 3928140   | 349 | 11 | 32 | 28.357<br>/5.47 | 30.702<br>8/5.10 |  | membrane, generation of precursor metabolites and energy, photosynthesis, plastid                                                            |
| CaM-75*  | Chlorophyll a/b binding protein                 | 3928140   | 411 | 12 | 30 | 28.35/<br>5.47  | 30.58/<br>4.78   |  | membrane, generation of precursor metabolites and energy, photosynthesis, plastid                                                            |
| CaM-196* | Oxygen-evolving enhancer protein 1              | 131384    | 177 | 6  | 15 | 35.44/<br>5.19  | 35.44/<br>5.19   |  | membrane, binding, generation of precursor metabolites and energy, photosynthesis, plastid, thylakoid                                        |

|          |                                                         |           |     |    |    |                |                |  |                                                                                                                                              |
|----------|---------------------------------------------------------|-----------|-----|----|----|----------------|----------------|--|----------------------------------------------------------------------------------------------------------------------------------------------|
| CaM-294* | Putative PSII-P protein                                 | 217072770 | 104 | 2  | 8  | 28.48/<br>7.12 | 25.41/<br>5.59 |  | membrane, thylakoid, binding, photosynthesis                                                                                                 |
| CaM-71*  | light-harvesting complex II protein Lhcb3               | 224117282 | 113 | 3  | 12 | 24.20/<br>4.77 | 28.14/<br>4.77 |  | membrane, generation of precursor metabolites and energy, photosynthesis, plastid                                                            |
| CaM-78*  | Chlorophyll a/b binding protein                         | 3928140   | 400 | 12 | 39 | 28.35/<br>5.47 | 35.24/<br>4.77 |  | membrane, generation of precursor metabolites and energy, photosynthesis, plastid                                                            |
| CaM-22!  | Chlorophyll a/b-binding protein 3 precursor             | 115800    | 160 | 7  | 19 | 27.90/<br>5.46 | 29.38/<br>4.47 |  | binding, generation of precursor metabolites and energy, photosynthesis, membrane, thylakoid, cellular protein modification process, plastid |
| CaM-69!  | Chlorophyll A-B binding protein                         | 169124051 | 118 | 8  | 12 | 28.59/<br>5.44 | 28.05/<br>4.62 |  | membrane, generation of precursor metabolites and energy, photosynthesis, plastid                                                            |
| CaM-127! | PSI type III chlorophyll a/b-binding protein (imported) | 15219941  | 99  | 7  | 11 | 29.16/<br>8.61 | 27.98/<br>4.98 |  | plastid, generation of precursor metabolites and energy, photosynthesis, intracellular, binding, membrane, thylakoid                         |
| CaM-125! | Oxygen-evolving enhancer protein 1                      | 131384    | 111 | 7  | 14 | 35.10/<br>6.25 | 27.83/<br>4.87 |  | membrane, binding, generation of precursor metabolites and energy, photosynthesis, plastid, thylakoid                                        |
| CaM-183! | Oxygen-evolving enhancer protein 2                      | 131390    | 89  | 9  | 14 | 28.20/<br>8.29 | 25.64/<br>5.16 |  | membrane, binding, photosynthesis, plastid, thylakoid                                                                                        |

|          |                                                        |           |     |    |    |                |                |                                                                                       |                                                                                                                                                                                                                                                                |
|----------|--------------------------------------------------------|-----------|-----|----|----|----------------|----------------|---------------------------------------------------------------------------------------|----------------------------------------------------------------------------------------------------------------------------------------------------------------------------------------------------------------------------------------------------------------|
| CaM-376* | Ferredoxin-NADP reductase                              | 125553745 | 81  | 2  | 5  | 39.95/<br>8.72 | 36.9/6.<br>12  | 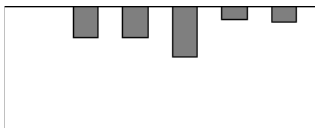   | plastid                                                                                                                                                                                                                                                        |
| CaM-74!  | Light-harvesting chlorophyll-a/b binding protein Lhcb1 | 56809379  | 387 | 13 | 19 | 28.43/<br>5.48 | 30.58/<br>4.93 |    | binding, generation of precursor metabolites and energy, photosynthesis, membrane, thylakoid, cellular protein modification process, plastid                                                                                                                   |
| CaM-319! | Putative ferredoxin-NADP(H) oxidoreductase             | 41052915  | 67  | 7  | 19 | 41.09/<br>7.98 | 39.76/<br>5.92 |    | plastid                                                                                                                                                                                                                                                        |
| CaM-452¶ | Ferredoxin: nadp+ reductase                            | 4930119   | 130 | 3  | 12 | 34.98/<br>6.54 | 36.58/<br>6.49 |    | nucleotide binding, protein binding, transport, plastid, catalytic activity, photosynthesis, membrane, thylakoid, generation of precursor metabolites and energy                                                                                               |
| CaM-226! | ATPase beta subunit (Fragment)                         | 6467935   | 276 | 18 | 27 | 51.53/<br>5.22 | 65.89/<br>5.21 |    | membrane, intracellular, transport, biosynthetic process, generation of precursor metabolites and energy, nucleobase-containing compound metabolic process, hydrolase activity, transporter activity, nucleotide binding, cellular process                     |
| CaM-147* | ATP synthase subunit beta, chloroplastic               | 11466372  | 92  | 2  | 6  | 51.99/<br>5.10 | 44.87/<br>4.84 |  | membrane, intracellular, transport, biosynthetic process, generation of precursor metabolites and energy, nucleobase-containing compound metabolic process, hydrolase activity, transporter activity, nucleotide binding, plastid, thylakoid, cellular process |
| CaM-189* | ATP synthase subunit alpha                             | 197294119 | 589 | 19 | 24 | 55.64/<br>5.44 | 32.38/<br>5.16 |  | membrane, intracellular, transport, biosynthetic process, generation of precursor metabolites and energy, nucleobase-containing compound metabolic process, transporter activity, nucleotide binding, hydrolase activity, plastid, thylakoid, cellular process |

|          |                                      |           |     |    |     |                |                 |                                                                                       |                                                                                                                                                                                                                                                                |
|----------|--------------------------------------|-----------|-----|----|-----|----------------|-----------------|---------------------------------------------------------------------------------------|----------------------------------------------------------------------------------------------------------------------------------------------------------------------------------------------------------------------------------------------------------------|
| CaM-221! | ATP synthase beta subunit (Fragment) | 3850926   | 116 | 13 | 22  | 52.73/<br>5.15 | 65.80/<br>5.14  | 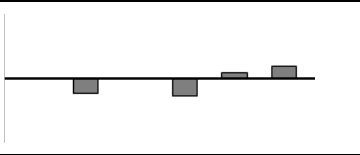   | membrane, intracellular, transport, biosynthetic process, generation of precursor metabolites and energy, nucleobase-containing compound metabolic process, hydrolase activity, transporter activity, nucleotide binding, plastid, thylakoid, cellular process |
| CaM-161! | ATP synthase beta subunit (Fragment) | 7708546   | 918 | 41 | 51  | 51.18/<br>5.07 | 65.76/<br>5.04  |    | membrane, intracellular, transport, biosynthetic process, generation of precursor metabolites and energy, nucleobase-containing compound metabolic process, hydrolase activity, transporter activity, nucleotide binding, plastid, thylakoid, cellular process |
| CaM-80!  | ATP synthase beta subunit (Fragment) | 4063542   | 671 | 19 | 26  | 49.13/<br>5.06 | 35.75/<br>4.60  |    | membrane, intracellular, transport, biosynthetic process, generation of precursor metabolites and energy, nucleobase-containing compound metabolic process, hydrolase activity, transporter activity, nucleotide binding, plastid, thylakoid, cellular process |
| CaM-205* | ATP synthase subunit beta            | 269914683 | 171 | 4  | 12  | 59.68/<br>6.18 | 38.234<br>/5.10 |    | hydrolase activity, transporter activity, transport, cellular process, biosynthetic process, generation of precursor metabolites and energy, nucleobase-containing compound metabolic process, membrane, mitochondrion, catabolic process, nucleotide binding  |
| CaM-162! | ATP synthase beta subunit (Fragment) | 66276255  | 730 | 26 | 41  | 52.42/<br>5.54 | 65.83/<br>4.95  |    | membrane, intracellular, transport, biosynthetic process, generation of precursor metabolites and energy, nucleobase-containing compound metabolic process, hydrolase activity, transporter activity, plastid, nucleotide binding, cellular process            |
| CaM-207* | ATP synthase subunit alpha           | 197294119 | 196 | 7  |     | 55.64/<br>5.44 | 42.15/<br>5.30  |   | membrane, intracellular, transport, biosynthetic process, generation of precursor metabolites and energy, nucleobase-containing compound metabolic process, transporter activity, nucleotide binding, hydrolase activity, plastid, thylakoid, cellular process |
| CaM-222* | ATP synthase subunit beta            | 197294097 | 410 | 19 | 27  | 52.96/<br>5.16 | 73.99/<br>5.16  |  | membrane, intracellular, transport, biosynthetic process, generation of precursor metabolites and energy, nucleobase-containing compound metabolic process, hydrolase activity, transporter activity, nucleotide binding, plastid, thylakoid, cellular process |
| CaM-295* | ATP synthase subunit alpha           | 197294119 | 153 | 5  | 295 | 55.64/<br>5.44 | 29.74/<br>5.76  |  | membrane, intracellular, transport, biosynthetic process, generation of precursor metabolites and energy, nucleobase-containing compound metabolic process, transporter activity, nucleotide binding, hydrolase activity, plastid, thylakoid, cellular process |



|          |                                |           |     |    |    |                 |                  |                                                                                       |                                                                                                                                                                                                                                                                |
|----------|--------------------------------|-----------|-----|----|----|-----------------|------------------|---------------------------------------------------------------------------------------|----------------------------------------------------------------------------------------------------------------------------------------------------------------------------------------------------------------------------------------------------------------|
|          |                                |           |     |    |    |                 |                  |                                                                                       |                                                                                                                                                                                                                                                                |
| CaM-316* | ATP synthase subunit alpha     | 197294119 | 328 | 10 | 17 | 55.64/<br>5.44  | 45.62/<br>5.83   |    | membrane, intracellular, transport, biosynthetic process, generation of precursor metabolites and energy, nucleobase-containing compound metabolic process, transporter activity, nucleotide binding, hydrolase activity, plastid, thylakoid, cellular process |
| CaM-335* | ATP synthase subunit alpha     | 197294119 | 75  | 2  | 4  | 55.64/<br>5.44  | 69.22/<br>5.62   |    | membrane, intracellular, transport, biosynthetic process, generation of precursor metabolites and energy, nucleobase-containing compound metabolic process, transporter activity, nucleotide binding, hydrolase activity, plastid, thylakoid, cellular process |
| CaM-382* | ATP synthase subunit alpha     | 197294119 | 388 | 8  | 15 | 55.64/<br>5.44  | 41.60/<br>5.97   |    | membrane, intracellular, transport, biosynthetic process, generation of precursor metabolites and energy, nucleobase-containing compound metabolic process, transporter activity, nucleotide binding, hydrolase activity, plastid, thylakoid, cellular process |
| CaM-386* | ATP synthase subunit alpha     | 197294119 | 424 | 10 | 22 | 55.64/<br>5.44  | 44.18/<br>6.18   |    | membrane, intracellular, transport, biosynthetic process, generation of precursor metabolites and energy, nucleobase-containing compound metabolic process, transporter activity, nucleotide binding, hydrolase activity, plastid, thylakoid, cellular process |
| CaM-254* | ATP synthase gamma chain       | 217072566 | 207 | 4  | 13 | 41.18/<br>8.33  | 34.82/<br>5.48   |   | membrane, intracellular, transporter activity, transport, biosynthetic process, generation of precursor metabolites and energy, nucleobase-containing compound metabolic process, nucleotide binding, hydrolase activity                                       |
| CaM-269* | ATP synthase subunit alpha     | 13518443  | 326 | 8  | 15 | 55.80/<br>5.22  | 65.19/<br>5.34   |  | membrane, intracellular, transporter activity, transport, biosynthetic process, generation of precursor metabolites and energy, nucleobase-containing compound metabolic process, nucleotide binding, hydrolase activity, plastid, thylakoid, cellular process |
| CaM-311* | ATP synthase CF1 alpha subunit | 393396111 | 295 | 5  | 11 | 55.737<br>/5.21 | 42.490<br>6/5.89 |  | ATP binding, ATP hydrolysis coupled proton transport, ATP synthesis coupled proton transport                                                                                                                                                                   |

|          |                                                        |           |     |    |    |                |                  |  |                                                                                                                                                                                                                                                                |
|----------|--------------------------------------------------------|-----------|-----|----|----|----------------|------------------|--|----------------------------------------------------------------------------------------------------------------------------------------------------------------------------------------------------------------------------------------------------------------|
| CaM-396* | ATP synthase subunit alpha                             | 197294119 | 439 | 10 | 19 | 55.64/<br>5.44 | 52.90/<br>5.91   |  | membrane, intracellular, transport, biosynthetic process, generation of precursor metabolites and energy, nucleobase-containing compound metabolic process, transporter activity, nucleotide binding, hydrolase activity, plastid, thylakoid, cellular process |
| CaM-272! | ATP synthase CF1 alpha subunit                         | 13518443  | 572 | 21 | 23 | 55.80/<br>5.22 | 69.51/<br>5.51   |  | membrane, intracellular, transporter activity, transport, biosynthetic process, generation of precursor metabolites and energy, nucleobase-containing compound metabolic process, nucleotide binding, hydrolase activity, plastid, thylakoid, cellular process |
| CaM-218* | Glutamine synthetase                                   | 12963877  | 50  | 1  | 2  | 47.40/<br>5.73 | 50.72/<br>5.32   |  | catalytic activity, nucleotide binding, biosynthetic process,                                                                                                                                                                                                  |
| CaM-308* | Fructose-bisphosphate aldolase 1                       | 399024    | 182 | 5  | 14 | 38.63/<br>5.83 | 39.99/<br>5.62   |  | carbohydrate metabolic process, generation of precursor metabolites and energy, catabolic process, catalytic activity, plastid                                                                                                                                 |
| CaM-310¶ | Fructose-bisphosphate aldolase (EC 4.1.2.13) precursor | 399024    | 206 | 6  | 17 | 38.74/<br>5.83 | 39.89/<br>5.86   |  | carbohydrate metabolic process, generation of precursor metabolites and energy, catabolic process, catalytic activity, plastid                                                                                                                                 |
| CaM-461* | Glyceraldehyde-3-phosphate dehydrogenase               | 120666    | 167 | 4  |    | 36.68/<br>8.3  | 42.214<br>9/6.75 |  | cytoplasm, nucleotide binding, carbohydrate metabolic process, generation of precursor metabolites and energy, catabolic process, catalytic activity, metabolic process                                                                                        |
| CaM-141* | Phosphoglycerate kinase                                | 255544584 | 172 | 3  |    | 50.14/<br>8.47 | 40.16/<br>4.90   |  | phosphoglycerate kinase activity, glycolysis                                                                                                                                                                                                                   |
| CaM-322* | Phosphoglycerate kinase                                | 223975935 | 122 | 3  | 11 | 50.00/<br>8.74 | 46.94/<br>5.64   |  | phosphoglycerate kinase activity, glycolysis                                                                                                                                                                                                                   |

|          |                                                       |           |     |   |    |                |                |                                                                                       |                                                                                                                       |
|----------|-------------------------------------------------------|-----------|-----|---|----|----------------|----------------|---------------------------------------------------------------------------------------|-----------------------------------------------------------------------------------------------------------------------|
| CaM-257¶ | Plastidic aldolase                                    | 38096041  | 240 | 9 | 17 | 43.18/<br>6.86 | 35.52/<br>5.61 | 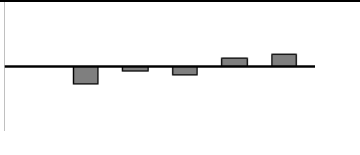   | carbohydrate metabolic process, generation of precursor metabolites and energy, catabolic process, catalytic activity |
| CaM-485* | Carbonic anhydrase                                    | 270342124 | 227 | 6 | 21 | 35.04/<br>8.09 | 27.45/<br>6.95 |    | binding, catalytic activity, metabolic process                                                                        |
| CaM-210* | Fructose-bisphosphate aldolase                        | 84468290  | 163 | 5 | 14 | 43.03/<br>6.86 | 40.35/<br>5.35 |    | carbohydrate metabolic process, generation of precursor metabolites and energy, catabolic process, catalytic activity |
| CaM-460! | Glyceraldehyde 3-phosphate dehydrogenase              | 3413165   | 70  | 4 | 15 | 20.88/<br>5.24 | 41.91/<br>6.66 |    | catalytic activity, metabolic process                                                                                 |
| CaM-216¶ | Glutamate-ammonia ligase (EC 6.3.1.2) delta precursor | 121344    | 39  | 1 | 2  | 47.65/<br>6.18 | 51.86/<br>5.13 |   | catalytic activity, metabolic process, nucleotide binding, plastid, biosynthetic process, 0                           |
| CaM-214¶ | Glutamate-ammonia ligase (EC 6.3.1.2) delta precursor | 121344    | 68  | 1 | 2  | 47.65/<br>6.18 | 51.14/<br>5.23 |  | catalytic activity, metabolic process, nucleotide binding, plastid, biosynthetic process, 0                           |
| CaM-206! | Phosphoribulokinase                                   | 1885326   | 71  | 6 | 7  | 39.23/<br>5.41 | 43.82/<br>5.18 |  | carbohydrate metabolic process, kinase activity, nucleotide binding, metabolic process, cellular process              |
| CaM-435* | Carbonic anhydrase                                    | 8954289   | 95  | 3 | 14 | 35.46/<br>7.59 | 29.73/<br>6.47 |  | binding, catalytic activity, metabolic process                                                                        |

|          |                                              |           |     |    |    |                 |                |                                                                                       |                                                                                                                                                                                                                   |
|----------|----------------------------------------------|-----------|-----|----|----|-----------------|----------------|---------------------------------------------------------------------------------------|-------------------------------------------------------------------------------------------------------------------------------------------------------------------------------------------------------------------|
|          |                                              |           |     |    |    |                 |                |                                                                                       |                                                                                                                                                                                                                   |
| CaM-462* | Glyceraldehyde-3-phosphate dehydrogenase A   | 120658    | 200 | 6  | 12 | 43.31/<br>8.80  | 44.49/<br>6.81 | 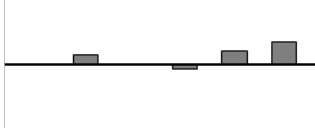   | biosynthetic process, carbohydrate metabolic process, photosynthesis, nucleotide binding, cellular process, plastid, metabolic process, catalytic activity                                                        |
| CaM-155! | Dynein-1-alpha heavy chain                   | 159490411 | 69  | 63 | 10 | 525.42<br>/5.32 | 61.98/<br>5.11 |    | motor activity, cytoskeleton, cellular component organization, cellular process, intracellular, nucleobase-containing compound metabolic process, catabolic process, nucleotide binding, cell, hydrolase activity |
| CaM-436* | Putative quinone oxidoreductase              | 21068664  | 158 | 4  | 25 | 21.70/<br>6.51  | 28.26/<br>6.62 |    | nucleotide binding, metabolic process, catalytic activity                                                                                                                                                         |
| CaM-54!  | Activator of spomin                          | 145357734 | 65  | 8  | 24 | 17.25/<br>9.63  | 12.38/<br>4.69 |    | sequence-specific DNA binding transcription factor activity, DNA binding,                                                                                                                                         |
| CaM-138* | Chromosome chr17 scaffold_16                 | 225456471 | 149 | 4  | 4  | 33.35/<br>5.67  | 37.90/<br>4.97 |   | ATP binding, protein binding, nucleoside-triphosphatase activity, protein metabolic process                                                                                                                       |
| CaM-43*  | Ribulose biphosphate carboxylase large chain | 197294096 | 295 | 8  | 16 | 52.65/<br>6.04  | 64.35/<br>4.29 |  | catalytic activity, plastid, photosynthesis, binding, metabolic process                                                                                                                                           |
| CaM-122* | Ribulose biphosphate carboxylase large chain | 197294096 | 148 | 7  |    | 52.65/<br>6.04  | 23.64/<br>5.05 |  | catalytic activity, plastid, photosynthesis, binding, metabolic process                                                                                                                                           |

|          |                                                          |           |     |    |    |                  |                  |                                                                                       |                                                                                                                                     |
|----------|----------------------------------------------------------|-----------|-----|----|----|------------------|------------------|---------------------------------------------------------------------------------------|-------------------------------------------------------------------------------------------------------------------------------------|
| CaM-290! | Intronic ORF;<br>similar to<br>LAGLIDADG<br>endonuclease | 2943730   | 80  | 11 | 21 | 29.46/<br>10.01  | 21.47/<br>6.00   | 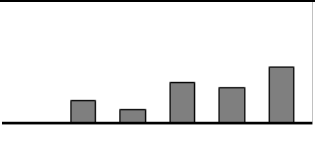   | DNA metabolic process, nuclease activity, DNA binding,<br>mitochondrion                                                             |
| CaM-443* | Predicted protein                                        | 224119706 | 53  | 1  | 3  | 27.44/<br>8.65   | 31.20/<br>6.64   |    | transferase activity                                                                                                                |
| CaM-416* | Unknown protein<br>18                                    | 226493856 | 84  | 3  |    | 68.61/<br>6.01   | 77.36/<br>6.44   |    | nucleotide binding, generation of precursor metabolites and<br>energy, catabolic process, catalytic activity,<br>molecular_function |
| CaM-263¶ | OSJNBb0085H11.<br>1 protein                              | 38346013  | 50  | 1  | 7  | 176.76<br>/9.26  | 53.68/<br>5.61   |    | RNA binding, RNA-directed DNA polymerase activity,<br>RNA-dependent DNA replication, DNA integration,<br>ribonuclease H activity    |
| CaM-9*   | Putative<br>uncharacterized<br>protein                   | 217075500 | 82  | 2  | 10 | 11.323<br>/ 4.31 | 14.4/4.<br>2     |    | ribosome, structural molecule activity, translation                                                                                 |
| CaM-346* | Putative<br>uncharacterized<br>protein                   | 118481093 | 108 | 2  | 2  | 80.69/<br>6.29   | 85.947<br>7/5.75 |   | transferase activity, metabolic process                                                                                             |
| CaM-24*  | Putative<br>uncharacterized<br>protein                   | 217071520 | 181 | 4  | 33 | 17.01/<br>9.00   | 26.54/<br>4.47   |  | ribosome, structural molecule activity, translation                                                                                 |
| CaM-323* | Putative<br>uncharacterized<br>protein                   | 224284512 | 94  | 2  | 7  | 40.97/<br>6.04   | 44.21/<br>5.66   |  | nucleotide binding                                                                                                                  |

|          |                                        |           |     |    |    |                 |                |                                                                                      |                                                               |
|----------|----------------------------------------|-----------|-----|----|----|-----------------|----------------|--------------------------------------------------------------------------------------|---------------------------------------------------------------|
| CaM-112* | Putative uncharacterized protein       | 8894548   | 154 | 5  | 10 | 54.58/<br>4.87  | 105/4.<br>72   | 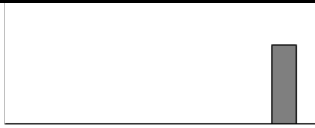  | transport, membrane                                           |
| CaM-445* | Putative uncharacterized               | 255646048 | 235 | 4  | 19 | 29.46/<br>5.79  | 32.89/<br>6.51 |   | transferase activity                                          |
| CaM-171! | Unknown protein                        | 15236812  | 67  | 16 | 8  | 90.90/<br>5.09  | 74.93/<br>5.11 |   | plastid                                                       |
| CaM-64!  | Hypothetical protein P0415D04.53       | 47496995  | 66  | 8  | 34 | 30.31/<br>11.81 | 24.12/<br>4.77 |   | N/F                                                           |
| CaM-267! | Hypothetical protein F26P21.180        | 3688187   | 67  | 10 | 22 | 57.25/<br>7.64  | 44.54/<br>5.58 |   | peptidyl-prolyl cis-trans isomerase activity, protein folding |
| CaM-56!  | Hypothetical protein OSJNBa0075N02.148 | 28972006  | 66  | 7  | 29 | 20.62/<br>12.24 | 22.37/<br>4.49 |  | N/F                                                           |

<sup>a</sup>Spot number as marked on 2-D gel images (**Fig. 1a**). The spot numbers were designated as CaM-X, where Ca indicates the organism (*Cicer arietinum*), M denotes the membrane fraction, and X denotes the spot number as given on 2-D gel image.

<sup>b</sup>Protein identification number as in GenBank.

<sup>c</sup>NP represent the number of peptide.

<sup>d</sup>Time kinetics represents the average change in spot density at various time points (Unstressed to 120 h). The data were taken in terms of fold expression with respect to the control value and were log transformed to the base two in order to level the scale of expression. The spot volume of each protein spot during the course of dehydration is given in Table S3.

Spots marked by ‘\*’ were identified by Q-TRAP, ‘¶’ identified by QStar, and ‘!’ identified by MALDI analysis.

**Supplementary Table S3.** Average normalized spot volume, standard deviation (SD) and coefficient of variance (CV) of identified protein spots and corresponding log transformed data are given below.

|         |                                                        | Untransformed data |       |       |             |       |       |             |       |       |             |       |       |             |       |       |             |       |       | Log transformed data |       |       |             |       |       |             |       |       |             |       |       |             |       |       |       |       |       |
|---------|--------------------------------------------------------|--------------------|-------|-------|-------------|-------|-------|-------------|-------|-------|-------------|-------|-------|-------------|-------|-------|-------------|-------|-------|----------------------|-------|-------|-------------|-------|-------|-------------|-------|-------|-------------|-------|-------|-------------|-------|-------|-------|-------|-------|
|         |                                                        | Dehydration (h)    |       |       |             |       |       |             |       |       |             |       |       |             |       |       |             |       |       | Dehydration (h)      |       |       |             |       |       |             |       |       |             |       |       |             |       |       |       |       |       |
| Spot ID | Identification                                         | Unstressed         |       |       | 24          |       |       | 48          |       |       | 72          |       |       | 96          |       |       | 120         |       |       | Unstressed           |       |       | 24          |       |       | 48          |       |       | 72          |       |       | 96          |       |       | 120   |       |       |
|         |                                                        | Av Norm Qty        | SD    | CV %  | Av Norm Qty | SD    | CV %  | Av Norm Qty | SD    | CV %  | Av Norm Qty | SD    | CV %  | Av Norm Qty | SD    | CV %  | Av Norm Qty | SD    | CV %  | Av Norm Qty          | SD    | CV %  | Av Norm Qty | SD    | CV %  | Av Norm Qty | SD    | CV %  | Av Norm Qty | SD    | CV %  | Av Norm Qty | SD    | CV %  |       |       |       |
| CaM-9   | Putative uncharacterized protein                       | 800.73             | 237.4 | 29.65 | 344.21      | 61.66 | 17.91 | 950.92      | 123.3 | 12.97 | 772.55      | 153.4 | 19.86 | 220.52      | 38.36 | 17.39 | 511.44      | 16.41 | 3.209 | 9.6032               | 0.425 | 4.428 | 8.412       | 0.252 | 2.996 | 9.885       | 0.186 | 1.888 | 9.573       | 0.293 | 3.067 | 7.769       | 0.258 | 3.328 | 8.997 | 0.046 | 0.517 |
| CaM-21  | Chlorophyll a/b-binding protein AB96                   | 991.14             | 198.8 | 20.06 | 618.93      | 124.9 | 20.18 | 1410.2      | 124.6 | 8.836 | 2222.8      | 346.7 | 15.59 | 2119.0      | 222.4 | 10.49 | 2751.9      | 253.5 | 9.213 | 9.9328               | 0.298 | 3.000 | 9.254       | 0.282 | 3.056 | 10.45       | 0.128 | 1.228 | 11.10       | 0.217 | 1.958 | 11.04       | 0.156 | 1.414 | 11.42 | 0.136 | 1.197 |
| CaM-22  | Chlorophyll a/b-binding protein 3 precursor            | 1029.1             | 184.6 | 17.94 | 719.28      | 174.6 | 24.27 | 2284.3      | 295.3 | 12.92 | 2321.5      | 149.9 | 6.458 | 1660.9      | 300.3 | 18.08 | 2949.0      | 678.3 | 23.00 | 9.9912               | 0.265 | 2.658 | 9.463       | 0.333 | 3.522 | 11.14       | 0.193 | 1.735 | 11.17       | 0.094 | 0.847 | 10.68       | 0.266 | 2.498 | 11.49 | 0.358 | 3.120 |
| CaM-24  | Putative uncharacterized protein                       | 0                  | 0     | 0     | 0           | 0     | 0     | 106.99      | 23.28 | 21.76 | 161.78      | 9.527 | 5.889 | 514.93      | 112.0 | 21.75 | 406.20      | 51.23 | 12.61 | 0                    | 0     | 0     | 0           | 0     | 0     | 6.719       | 0.307 | 4.581 | 7.336       | 0.085 | 1.170 | 8.986       | 0.304 | 3.389 | 8.658 | 0.187 | 2.169 |
| CaM-39  | Putative 60S ribosomal protein L1                      | 66.057             | 13.03 | 19.73 | 0           | 0     | 0     | 0           | 0     | 0     | 0           | 0     | 0     | 0           | 0     | 0     | 55.155      | 6.999 | 12.69 | 6.0264               | 0.290 | 4.816 | 0           | 0     | 0     | 0           | 0     | 0     | 0           | 0     | 0     | 0           | 0     | 5.777 | 0.185 | 3.212 |       |
| CaM-43  | Ribulose biphosphate carboxylase large chain           | 241.42             | 45.42 | 18.81 | 0           | 0     | 0     | 0           | 0     | 0     | 0           | 0     | 0     | 0           | 0     | 0     | 121.11      | 27.06 | 22.34 | 7.8976               | 0.280 | 3.554 | 0           | 0     | 0     | 0           | 0     | 0     | 0           | 0     | 0     | 0           | 6.896 | 0.321 | 4.657 |       |       |
| CaM-54  | Activator of spomin                                    | 0                  | 0     | 0     | 0           | 0     | 0     | 1406.8      | 257.0 | 18.27 | 39822       | 0     | 0     | 0           | 0     | 0     | 0           | 0     | 0     | 0                    | 0     | 0     | 0           | 0     | 0     | 10.44       | 0.256 | 2.459 | 0           | 0     | 0     | 0           | 0     | 0     | 0     | 0     |       |
| CaM-56  | Hypothetical protein OSINBa0075N02.148                 | 88.209             | 20.57 | 23.32 | 0           | 0     | 0     | 0           | 0     | 0     | 0           | 0     | 0     | 0           | 0     | 0     | 156.08      | 14.01 | 8.979 | 6.4351               | 0.351 | 5.465 | 0           | 0     | 0     | 0           | 0     | 0     | 0           | 0     | 0     | 0           | 7.282 | 0.129 | 1.775 |       |       |
| CaM-64  | Hypothetical protein P0415D04.53                       | 0                  | 0     | 0     | 333.17      | 111.0 | 33.32 | 372.04      | 70.28 | 18.89 | 324.29      | 79.89 | 24.63 | 0           | 0     | 0     | 0           | 0     | 0     | 0                    | 0     | 0     | 0           | 0     | 0     | 8.329       | 0.459 | 5.514 | 8.521       | 0.283 | 3.328 | 8.313       | 0.341 | 4.109 | 0     | 0     | 0     |
| CaM-69  | Chlorophyll A-B binding protein                        | 700.49             | 219.3 | 31.31 | 537.87      | 21.50 | 3.998 | 1205.9      | 208.4 | 17.28 | 1875.9      | 122.3 | 6.519 | 1127.0      | 216.6 | 19.22 | 954.55      | 88.10 | 9.229 | 9.4053               | 0.449 | 4.783 | 9.070       | 0.058 | 0.642 | 10.22       | 0.243 | 2.381 | 10.87       | 0.095 | 0.881 | 10.12       | 0.271 | 2.681 | 9.894 | 0.137 | 1.385 |
| CaM-71  | light-harvesting complex II protein Lhcb3              | 665.85             | 110.9 | 16.65 | 282.35      | 42.74 | 15.13 | 940.67      | 91.61 | 9.739 | 689.27      | 62.66 | 9.091 | 1643.1      | 259.2 | 15.77 | 723.52      | 216.7 | 29.95 | 9.3653               | 0.245 | 2.624 | 8.130       | 0.210 | 2.595 | 9.872       | 0.144 | 1.468 | 9.425       | 0.129 | 1.369 | 10.67       | 0.223 | 2.098 | 9.448 | 0.481 | 5.094 |
| CaM-73  | Actin (Fragment)                                       | 497.33             | 161.0 | 32.37 | 455.20      | 169.2 | 37.17 | 1263.4      | 78.02 | 6.175 | 955.90      | 60.37 | 6.315 | 1742.1      | 236.7 | 13.59 | 936.19      | 190.5 | 20.35 | 8.9114               | 0.439 | 4.933 | 8.767       | 0.512 | 5.841 | 10.30       | 0.090 | 0.875 | 9.898       | 0.092 | 0.938 | 10.75       | 0.203 | 1.887 | 9.850 | 0.294 | 2.990 |
| CaM-74  | Light-harvesting chlorophyll-a/b binding protein Lhcb1 | 1127.8             | 206.1 | 18.27 | 810.23      | 186.3 | 22.99 | 2144.5      | 420.2 | 19.59 | 2954.8      | 325.6 | 11.01 | 2667.4      | 181.7 | 6.814 | 6233.2      | 766.9 | 12.30 | 10.123               | 0.266 | 2.632 | 9.636       | 0.331 | 3.442 | 11.04       | 0.272 | 2.465 | 11.52       | 0.162 | 1.408 | 11.37       | 0.097 | 0.852 | 12.59 | 0.175 | 1.394 |
| CaM-75  | Chlorophyll a/b binding protein                        | 751.41             | 209.1 | 27.83 | 625.28      | 126.1 | 20.17 | 1574.7      | 202.6 | 12.86 | 3134.6      | 585.0 | 18.66 | 2591.6      | 752.0 | 29.01 | 3256.7      | 703.6 | 21.60 | 9.5165               | 0.399 | 4.193 | 9.268       | 0.298 | 3.221 | 10.61       | 0.192 | 1.812 | 11.59       | 0.286 | 2.469 | 11.30       | 0.398 | 3.526 | 11.64 | 0.328 | 2.819 |
| CaM-78  | Chlorophyll a/b binding protein                        | 769.93             | 182.2 | 23.66 | 344.35      | 80.63 | 23.41 | 368.60      | 81.66 | 22.15 | 639.42      | 179.9 | 28.13 | 367.80      | 91.69 | 24.93 | 127.60      | 18.18 | 14.25 | 9.5613               | 0.344 | 3.602 | 8.398       | 0.365 | 4.357 | 8.503       | 0.307 | 3.610 | 9.276       | 0.451 | 4.868 | 8.491       | 0.369 | 4.350 | 6.985 | 0.208 | 2.985 |
| CaM-80  | ATP synthase beta subunit (Fragment)                   | 270.70             | 14.50 | 5.357 | 0           | 0     | 0     | 784.49      | 182.9 | 23.32 | 119.86      | 26.06 | 21.74 | 315.40      | 8.463 | 2.683 | 0           | 0     | 0     | 8.0791               | 0.077 | 0.954 | 0           | 0     | 0     | 9.590       | 0.325 | 3.396 | 6.882       | 0.316 | 4.604 | 8.300       | 0.038 | 0.467 | 0     | 0     | 0     |
| CaM-85  | Calcineurin-like phosphoesterase family protein        | 0                  | 0     | 0     | 51.179      | 13.83 | 27.03 | 0           | 0     | 0     | 0           | 0     | 0     | 0           | 0     | 0     | 0           | 0     | 0     | 0                    | 0     | 0     | 5.642       | 0.385 | 6.832 | 0           | 0     | 0     | 0           | 0     | 0     | 0           | 0     | 0     | 0     | 0     |       |
| CaM-94  | Chaperonin 60 alpha subunit                            | 174.08             | 9.669 | 5.554 | 113.67      | 15.74 | 13.85 | 183.18      | 29.83 | 16.28 | 333.43      | 85.86 | 25.75 | 78.706      | 18.88 | 23.99 | 135.95      | 11.16 | 8.214 | 7.4421               | 0.081 | 1.094 | 6.819       | 0.202 | 2.967 | 7.505       | 0.225 | 3.009 | 8.347       | 0.386 | 4.626 | 6.268       | 0.369 | 5.898 | 7.083 | 0.118 | 1.674 |
| CaM-99  | Chaperone DnaK                                         | 99.572             | 30.27 | 30.40 | 228.70      | 64.92 | 28.38 | 86.117      | 17.49 | 20.30 | 60.274      | 16.11 | 26.73 | 47.123      | 4.891 | 10.37 | 0           | 0     | 0     | 6.5966               | 0.411 | 6.239 | 7.795       | 0.430 | 5.525 | 6.407       | 0.299 | 4.676 | 5.876       | 0.404 | 6.887 | 5.553       | 0.147 | 2.655 | 0     | 0     | 0     |
| CaM-112 | Putative uncharacterized protein                       | 0                  | 0     | 0     | 0           | 0     | 0     | 0           | 0     | 0     | 0           | 0     | 0     | 0           | 0     | 0     | 377.33      | 69.43 | 18.40 | 0                    | 0     | 0     | 0           | 0     | 0     | 0           | 0     | 0     | 0           | 0     | 0     | 0           | 8.544 | 0.254 | 2.973 |       |       |
| CaM-115 | Trypsin inhibitor, chain B (fragments)                 | 50.824             | 13.00 | 25.58 | 0           | 0     | 0     | 0           | 0     | 0     | 0           | 0     | 0     | 0           | 0     | 0     | 0           | 0     | 0     | 5.6368               | 0.361 | 6.410 | 0           | 0     | 0     | 0           | 0     | 0     | 0           | 0     | 0     | 0           | 0     | 0     | 0     | 0     |       |
| CaM-122 | Ribulose biphosphate carboxylase large chain           | 315.08             | 45.16 | 14.33 | 374.62      | 54.43 | 14.53 | 247.36      | 42.32 | 17.10 | 1013.5      | 300.0 | 29.60 | 900.45      | 211.3 | 23.47 | 0           | 0     | 0     | 8.2900               | 0.200 | 2.422 | 8.538       | 0.214 | 2.510 | 7.936       | 0.244 | 3.079 | 9.942       | 0.430 | 4.331 | 9.785       | 0.359 | 3.674 | 0     | 0     | 0     |
| CaM-125 | Oxygen-evolving enhancer protein 1                     | 153.88             | 45.29 | 29.43 | 61.545      | 14.24 | 23.14 | 347.94      | 68.17 | 19.59 | 155.45      | 36.51 | 23.48 | 29.377      | 5.242 | 17.84 | 53.017      | 14.90 | 28.11 | 7.2169               | 0.476 | 6.603 | 5.919       | 0.316 | 5.352 | 8.422       | 0.302 | 3.594 | 7.250       | 0.369 | 5.092 | 4.861       | 0.252 | 5.186 | 5.685 | 0.440 | 7.745 |
| CaM-127 | PSI type III chlorophyll                               | 1815.2             | 427.4 | 23.54 | 589.82      | 52.69 | 8.933 | 1473.5      | 488.7 | 33.17 | 1274.2      | 283.0 | 22.21 | 805.50      | 157.0 | 19.49 | 517.30      | 24.42 | 4.720 | 10.800               | 0.333 | 3.083 | 9.200       | 0.128 | 1.392 | 10.47       | 0.454 | 4.340 | 10.29       | 0.335 | 3.260 | 9.636       | 0.269 | 2.792 | 9.013 | 0.069 | 0.766 |





|         |                                                            |             |   |          |          |             |   |          |          |             |   |          |          |             |   |          |          |             |   |          |          |             |   |          |          |             |   |          |          |          |   |          |          |          |   |          |          |          |   |          |          |          |   |          |          |          |   |          |          |
|---------|------------------------------------------------------------|-------------|---|----------|----------|-------------|---|----------|----------|-------------|---|----------|----------|-------------|---|----------|----------|-------------|---|----------|----------|-------------|---|----------|----------|-------------|---|----------|----------|----------|---|----------|----------|----------|---|----------|----------|----------|---|----------|----------|----------|---|----------|----------|----------|---|----------|----------|
| CaM-240 | 40S ribosomal protein S12                                  | 987.7069767 | ± | 268.0752 | 27.14116 | 871.3950596 | ± | 295.4913 | 33.91014 | 418.7048616 | ± | 25.86992 | 6.178557 | 313.0595518 | ± | 74.36789 | 23.75519 | 312.2579013 | ± | 70.07268 | 22.44064 | 403.91059   | ± | 36.17875 | 8.957119 | 9.914123982 | ± | 0.377788 | 3.810609 | 9.709861 | ± | 0.502626 | 5.176447 | 8.707968 | ± | 0.088646 | 1.01799  | 8.264375 | ± | 0.330836 | 4.003158 | 8.259547 | ± | 0.351212 | 4.252197 | 8.653915 | ± | 0.132179 | 1.52739  |
| CaM-246 | Putative serine/threonine kinase                           | 1377.944007 | ± | 255.4748 | 18.54029 | 749.5542814 | ± | 107.1308 | 14.29261 | 1355.272892 | ± | 231.3435 | 17.06989 | 901.5542166 | ± | 119.0295 | 13.20269 | 1181.893661 | ± | 130.3601 | 11.02977 | 757.9014685 | ± | 146.2706 | 19.29942 | 10.41075801 | ± | 0.27957  | 2.685392 | 9.539445 | ± | 0.215782 | 2.262002 | 10.39016 | ± | 0.248877 | 2.395311 | 9.807683 | ± | 0.193952 | 1.977548 | 10.20124 | ± | 0.154851 | 1.517964 | 9.548567 | ± | 0.271153 | 2.839723 |
| CaM-247 | Membrane protein CH1-like                                  | 1300.527227 | ± | 280.8634 | 21.59612 | 561.9487394 | ± | 119.6997 | 21.30082 | 1744.187264 | ± | 170.9282 | 9.799878 | 602.5872602 | ± | 124.7725 | 20.70613 | 348.1276445 | ± | 102.6666 | 29.49108 | 219.5200137 | ± | 30.37146 | 13.83539 | 10.32369232 | ± | 0.298256 | 2.889042 | 9.1133   | ± | 0.298389 | 3.274218 | 10.76386 | ± | 0.138044 | 1.282474 | 9.215666 | ± | 0.284621 | 3.088444 | 8.401644 | ± | 0.425444 | 5.063822 | 7.769054 | ± | 0.198773 | 2.558522 |
| CaM-254 | ATP synthase gamma chain                                   | 0           | ± | 0        | 0        | 0           | ± | 0        | 0        | 199.0705819 | ± | 48.07169 | 24.14806 | 110.2776753 | ± | 15.96955 | 14.48122 | 125.2832096 | ± | 11.74345 | 9.373522 | 0           | ± | 0        | 0        | 0           | ± | 0        | 0        | 0        | ± | 0        | 0        | 7.608984 | ± | 0.349399 | 4.59193  | 6.774239 | ± | 0.219173 | 3.235397 | 6.964732 | ± | 0.13743  | 1.97323  | 0        | ± | 0        | 0        |
| CaM-257 | Plastidic aldolase                                         | 312.9857193 | ± | 82.07006 | 26.22166 | 218.5006362 | ± | 38.7164  | 17.71913 | 284.2018197 | ± | 66.78706 | 23.49987 | 261.2836329 | ± | 42.50557 | 16.26798 | 377.8176862 | ± | 53.68154 | 14.20832 | 411.8996177 | ± | 99.28867 | 24.10507 | 8.25542999  | ± | 0.390722 | 4.732914 | 7.75537  | ± | 0.268396 | 3.460772 | 8.120919 | ± | 0.369519 | 4.550207 | 8.017286 | ± | 0.227074 | 2.832308 | 8.552018 | ± | 0.202099 | 2.363179 | 8.654601 | ± | 0.380238 | 4.393475 |
| CaM-263 | OSJNBb008 SH11.1 protein                                   | 99.62429324 | ± | 15.12774 | 15.18479 | 905.1981151 | ± | 216.8239 | 23.9532  | 89.08459304 | ± | 6.091322 | 6.837683 | 0           | ± | 0        | 0        | 157.2286919 | ± | 14.59574 | 9.283126 | 148.9586991 | ± | 7.73715  | 5.194158 | 6.626568562 | ± | 0.230221 | 3.474208 | 9.792604 | ± | 0.363082 | 3.707716 | 6.474798 | ± | 0.100527 | 1.552592 | 0        | ± | 0        | 0        | 7.292593 | ± | 0.133525 | 1.830494 | 7.217494 | ± | 0.073942 | 1.02448  |
| CaM-267 | Hypothetical protein F26P21.180                            | 0           | ± | 0        | 0        | 0           | ± | 0        | 0        | 125.131373  | ± | 21.86138 | 17.47074 | 0           | ± | 0        | 0        | 93.95717154 | ± | 83.67643 | 89.05806 | 308.0762108 | ± | 278.8533 | 90.5144  | 0           | ± | 0        | 0        | 0        | ± | 0        | 0        | 6.951385 | ± | 0.267582 | 3.849328 | 0        | ± | 0        | 0        | 4.749954 | ± | 4.118491 | 86.70591 | 5.886363 | ± | 5.104154 | 86.71151 |
| CaM-269 | ATP synthase subunit alpha                                 | 71.38976393 | ± | 18.10711 | 25.36373 | 0           | ± | 0        | 0        | 44.59322585 | ± | 6.294728 | 14.11588 | 0           | ± | 0        | 0        | 0           | ± | 0        | 0        | 368.154981  | ± | 55.21958 | 14.999   | 6.125330751 | ± | 0.378052 | 6.17194  | 0        | ± | 0        | 0        | 5.469561 | ± | 0.197302 | 3.607281 | 0        | ± | 0        | 0        | 0        | ± | 0        | 0        | 8.513033 | ± | 0.221124 | 2.597476 |
| CaM-271 | H <sup>+</sup> -transporting two-sector ATPase-alpha chain | 405.4887197 | ± | 71.96985 | 17.74892 | 136.4659069 | ± | 37.9864  | 27.83581 | 303.9578347 | ± | 56.01678 | 18.42913 | 256.8052927 | ± | 59.61912 | 23.21569 | 565.4594473 | ± | 150.5812 | 26.62988 | 394.1985313 | ± | 10.97133 | 2.783199 | 8.648853023 | ± | 0.249809 | 2.888351 | 7.04957  | ± | 0.444854 | 6.310372 | 8.231372 | ± | 0.266143 | 3.233272 | 7.980329 | ± | 0.317699 | 3.98102  | 9.110552 | ± | 0.372221 | 4.085598 | 8.622403 | ± | 0.040375 | 0.468263 |
| CaM-272 | ATP synthase CF1 alpha subunit                             | 187.3827237 | ± | 39.30421 | 20.97536 | 80.35283871 | ± | 26.40226 | 32.8579  | 153.9713588 | ± | 24.86762 | 16.15081 | 132.7380417 | ± | 37.16264 | 27.99698 | 348.222826  | ± | 51.75817 | 14.86352 | 225.9500683 | ± | 34.65969 | 15.33953 | 7.52982039  | ± | 0.290092 | 3.852579 | 6.278463 | ± | 0.459052 | 7.311539 | 7.254178 | ± | 0.230127 | 3.172332 | 7.011789 | ± | 0.427273 | 6.09364  | 8.432578 | ± | 0.224308 | 2.660017 | 7.807725 | ± | 0.233063 | 2.985026 |
| CaM-283 | 40S ribosomal protein S12                                  | 734.9789598 | ± | 220.3164 | 29.97588 | 570.1481848 | ± | 92.48314 | 16.2209  | 313.0553352 | ± | 88.72583 | 28.3419  | 612.2235947 | ± | 129.5377 | 21.15857 | 388.6666018 | ± | 76.40449 | 19.65811 | 372.2003839 | ± | 106.2093 | 28.53552 | 9.480481609 | ± | 0.415844 | 4.386317 | 9.142624 | ± | 0.232834 | 2.54669  | 8.253951 | ± | 0.389867 | 4.723395 | 9.235079 | ± | 0.318945 | 3.453621 | 8.582005 | ± | 0.303645 | 3.538156 | 8.501158 | ± | 0.408582 | 4.806194 |
| CaM-290 | Intronic ORF; similar to LAGLIDADG endonuclease            | 159.6017599 | ± | 22.38162 | 14.02342 | 304.842141  | ± | 65.83113 | 21.59515 | 236.5289991 | ± | 63.83282 | 26.98731 | 516.3034927 | ± | 172.1485 | 33.3425  | 434.9218119 | ± | 82.93485 | 19.06891 | 778.0383992 | ± | 245.5914 | 31.56546 | 7.30919576  | ± | 0.197093 | 2.69651  | 8.228299 | ± | 0.32383  | 3.935562 | 7.848063 | ± | 0.412169 | 5.251852 | 8.954298 | ± | 0.509768 | 5.692993 | 8.747501 | ± | 0.270607 | 3.093535 | 9.553582 | ± | 0.471005 | 4.930138 |
| CaM-294 | Putative PSII-P protein                                    | 435.1426626 | ± | 97.57956 | 22.42473 | 1053.720162 | ± | 174.5428 | 16.56444 | 713.5019293 | ± | 102.5877 | 14.37805 | 544.1659433 | ± | 150.3704 | 27.6332  | 548.8710596 | ± | 166.5999 | 30.35319 | 300.2077469 | ± | 77.46817 | 25.80485 | 8.74270335  | ± | 0.307524 | 3.517488 | 10.0278  | ± | 0.242775 | 2.421024 | 9.468259 | ± | 0.216236 | 2.283804 | 9.052751 | ± | 0.385479 | 4.258142 | 9.05686  | ± | 0.431458 | 4.763882 | 8.194782 | ± | 0.397958 | 4.856234 |
| CaM-295 | ATP synthase subunit alpha                                 | 367.9713898 | ± | 43.63764 | 11.85898 | 348.1155756 | ± | 62.81237 | 18.04354 | 385.9581669 | ± | 86.19277 | 22.33215 | 308.5119194 | ± | 31.89768 | 10.33921 | 386.7804766 | ± | 73.66053 | 19.04453 | 204.888218  | ± | 36.63627 | 17.8811  | 8.516396257 | ± | 0.176525 | 2.072769 | 8.42756  | ± | 0.262882 | 3.11931  | 8.568124 | ± | 0.324128 | 3.782956 | 8.26415  | ± | 0.146782 | 1.77613  | 8.578538 | ± | 0.267413 | 3.117236 | 7.662104 | ± | 0.272885 | 3.561489 |
| CaM-299 | Histone acetyltransferase GCN5                             | 501.9241253 | ± | 160.7037 | 32.01752 | 553.463453  | ± | 47.14607 | 8.518371 | 722.6573684 | ± | 77.36342 | 10.70541 | 441.474906  | ± | 88.76334 | 20.10609 | 816.8477448 | ± | 38.58331 | 4.72344  | 1428.537595 | ± | 101.2357 | 7.086669 | 8.922279542 | ± | 0.460035 | 5.156024 | 9.10895  | ± | 0.120351 | 1.321243 | 9.491695 | ± | 0.153642 | 1.618701 | 8.767904 | ± | 0.276726 | 3.156124 | 9.67284  | ± | 0.068629 | 0.709498 | 10.47784 | ± | 0.104509 | 0.997426 |
| CaM-301 | Proteasome subunit alpha type                              | 112.4911513 | ± | 29.52056 | 26.24257 | 207.8970982 | ± | 64.62029 | 31.08282 | 46.07677624 | ± | 7.3008   | 15.84329 | 156.8899022 | ± | 26.69462 | 17.01487 | 177.8746172 | ± | 46.86093 | 26.34492 | 212.9129487 | ± | 55.94538 | 26.27617 | 6.775803664 | ± | 0.417758 | 6.165443 | 7.65532  | ± | 0.432989 | 5.65606  | 5.514497 | ± | 0.219842 | 3.986628 | 7.280419 | ± | 0.235537 | 3.235216 | 7.438792 | ± | 0.401478 | 5.397082 | 7.699846 | ± | 0.388281 | 5.041928 |
| CaM-308 | Fructose-bisphosphate aldolase 1                           | 117.393245  | ± | 14.37543 | 12.24553 | 172.3707238 | ± | 48.33987 | 28.04413 | 117.4644995 | ± | 26.70737 | 22.73655 | 325.8808322 | ± | 89.34578 | 27.4167  | 435.4156397 | ± | 42.32943 | 9.721615 | 317.0081794 | ± | 67.13946 | 21.17909 | 6.868197574 | ± | 0.172882 | 2.517134 | 7.387281 | ± | 0.437921 | 5.928037 | 6.852735 | ± | 0.31254  | 4.560808 | 8.310296 | ± | 0.409852 | 4.931854 | 8.761737 | ± | 0.139506 | 1.592224 | 8.28452  | ± | 0.329105 | 3.972527 |
| CaM-310 | Fructose-bisphosphate aldolase (EC 4.1.2.13) precursor     | 473.9764006 | ± | 125.9747 | 26.57827 | 550.7476696 | ± | 24.05862 | 4.368357 | 601.3152269 | ± | 41.7425  | 6.941867 | 919.75208   | ± | 73.36341 | 7.976433 | 494.9155719 | ± | 62.92319 | 12.71392 | 411.1523395 | ± | 74.0048  | 17.99936 | 8.849693978 | ± | 0.424194 | 4.793315 | 9.10432  | ± | 0.063535 | 0.697858 | 9.22963  | ± | 0.101136 | 1.095776 | 9.841937 | ± | 0.117984 | 1.198793 | 8.94322  | ± | 0.184219 | 2.059871 | 8.668773 | ± | 0.249105 | 2.873591 |
| CaM-311 | ATP synthase CF1 alpha subunit                             | 22.34961557 | ± | 2.695593 | 12.06103 | 0           | ± | 0        | 0        | 86.94705594 | ± | 14.42254 | 16.58773 | 109.0585742 | ± | 14.18655 | 13.00819 | 64.69036924 | ± | 12.42819 | 19.21181 | 0           | ± | 0        | 0        | 4.475460404 | ± | 0.168728 | 3.77007  | 0        | ± | 0        | 0        | 6.427797 | ± | 0.253044 | 3.93672  | 6.760693 | ± | 0.189896 | 2.808821 | 5.996753 | ± | 0.288436 | 4.809865 | 0        | ± | 0        | 0        |
| CaM-316 | ATP synthase subunit alpha                                 | 45.37315478 | ± | 4.455734 | 9.820199 | 0           | ± | 0        | 0        | 0           | ± | 0        | 0        | 0           | ± | 0        | 0        | 62.3685241  | ± | 15.77528 | 25.29366 | 0           | ± | 0        | 0        | 5.499235144 | ± | 0.139229 | 2.531789 | 0        | ± | 0        | 0        | 0        | ± | 0        | 0        | 0        | ± | 0        | 0        | 5.931756 | ± | 0.36689  | 6.185184 | 0        | ± | 0        | 0        |
| CaM-319 | Putative ferredoxin-NADP(H) oxidoreductase                 | 0           | ± | 0        | 0        | 0           | ± | 0        | 0        | 0           | ± | 0        | 0        | 0           | ± | 0        | 0        | 0           | ± | 0        | 0        | 2345.34985  | ± | 144.0948 | 6.143849 | 0           | ± | 0        | 0        | 0        | ± | 0        | 0        | 0        | ± | 0        | 0        | 0        | ± | 0        | 0        | 0        | ± | 0        | 0        | 11.19377 | ± | 0.088763 | 0.792966 |
| CaM-322 | Phosphoglycerate kinase                                    | 92.03106903 | ± | 18.42314 | 20.01839 | 0           | ± | 0        | 0        | 65.72510369 | ± | 7.602466 | 11.56707 | 0           | ± | 0        | 0        | 0           | ± | 0        | 0        | 0           | ± | 0        | 0        | 6.505646081 | ± | 0.278802 | 4.28554  | 0        | ± | 0        | 0        | 6.031743 | ± | 0.170642 | 2.829066 | 0        | ± | 0        | 0        | 0        | ± | 0        | 0        | 0        | ± | 0        | 0        |
| CaM-323 | Putative uncharacterized protein                           | 106.3268523 | ± | 23.50151 | 22.10308 | 91.71003081 | ± | 24.20438 | 26.39229 | 103.5572225 | ± | 25.80918 | 24.92262 | 63.33160573 | ± | 9.299003 | 14.68304 | 68.88616851 | ± | 15.30137 | 22.21254 | 0           | ± | 0        | 0        | 6.7099829   | ± | 0.307219 | 4.578531 | 6.485344 | ± | 0.382167 | 5.892778 | 6.661573 | ± | 0.384602 | 5.773445 | 5.973914 | ± | 0.220448 | 3.690179 | 6.079723 | ± | 0.346877 | 5.705482 | 0        | ± | 0        |          |

|         |                                                      |                 |   |              |              |                 |   |              |              |                 |   |              |              |                 |   |              |              |                 |   |              |              |                 |   |              |              |   |       |                 |     |              |              |              |             |              |              |              |     |              |              |              |     |              |              |              |     |              |              |              |              |              |              |   |   |
|---------|------------------------------------------------------|-----------------|---|--------------|--------------|-----------------|---|--------------|--------------|-----------------|---|--------------|--------------|-----------------|---|--------------|--------------|-----------------|---|--------------|--------------|-----------------|---|--------------|--------------|---|-------|-----------------|-----|--------------|--------------|--------------|-------------|--------------|--------------|--------------|-----|--------------|--------------|--------------|-----|--------------|--------------|--------------|-----|--------------|--------------|--------------|--------------|--------------|--------------|---|---|
| -407    | al processing peptidase beta subunit                 | 16705           |   | 002          | 436          | 5768            |   | 175          | 986          | 1973            |   | 75           | 224          | 59111           |   | 013          | 636          | 40188           |   | 244          | 498          | 26817           |   | 592          | 514          |   | 33731 |                 | 174 | 564          | 661          |              | 62          | 344          | 047          |              | 501 | 293          | 694          |              | 914 | 145          | 098          |              | 153 | 536          | 741          |              | 623          | 612          |              |   |   |
| CaM-416 | Unknown protein 18                                   | 0               | ± | 0            | 0            | 70.561<br>6316  | ± | 17.73<br>442 | 25.13<br>323 | 0               | ± | 0            | 0            | 0               | ± | 0            | 0            | 84.023<br>96527 | ± | 0.896<br>625 | 1.067<br>107 | 0               | ± | 0            | 0            | 0 | ±     | 0               | 0   | 6.111<br>929 | ±            | 0.348<br>803 | 5.706<br>93 | 0            | ±            | 0            | 0   | 0            | ±            | 0            | 0   | 0            | ±            | 0            | 0   | 0            | ±            | 0.015<br>38  | 0.240<br>581 | 0            | ±            | 0 | 0 |
| CaM-428 | Beta-1,3-glucanase                                   | 438.14<br>77228 | ± | 106.4<br>719 | 24.30<br>046 | 0               | ± | 0            | 0            | 205.20<br>3578  | ± | 28.43<br>722 | 13.85<br>805 | 0               | ± | 0            | 0            | 0               | ± | 0            | 0            | 0               | ± | 0            | 0            | 0 | ±     | 8.7484<br>41914 | ±   | 0.335<br>608 | 3.836<br>207 | 0            | ±           | 0            | 0            | 7.672<br>071 | ±   | 0.193<br>402 | 2.520<br>857 | 0            | ±   | 0            | 0            | 0            | ±   | 0            | 0            | 0            | ±            | 0            | 0            |   |   |
| CaM-435 | Carbonic anhydrase                                   | 356.18<br>22473 | ± | 38.94<br>97  | 10.93<br>533 | 381.66<br>60875 | ± | 50.26<br>738 | 13.17<br>051 | 518.26<br>17545 | ± | 53.85<br>831 | 10.39<br>211 | 382.60<br>89248 | ± | 54.72<br>737 | 14.30<br>374 | 670.41<br>68691 | ± | 195.4<br>948 | 29.16<br>018 | 718.51<br>39003 | ± | 72.64<br>008 | 10.10<br>977 | 0 | ±     | 8.4706<br>74708 | ±   | 0.158<br>718 | 1.873<br>732 | 8.567<br>342 | ±           | 0.198<br>123 | 2.312<br>537 | 9.012<br>403 | ±   | 0.148<br>623 | 1.649<br>099 | 8.570<br>005 | ±   | 0.204<br>495 | 2.386<br>168 | 9.351<br>076 | ±   | 0.396<br>061 | 4.235<br>455 | 9.484<br>123 | ±            | 0.142<br>098 | 1.498<br>267 |   |   |
| CaM-436 | Putative quinone oxidoreductase                      | 229.42<br>77878 | ± | 52.19<br>81  | 22.75<br>143 | 327.37<br>67682 | ± | 28.63<br>517 | 8.746<br>855 | 278.49<br>30276 | ± | 89.63<br>21  | 32.18<br>468 | 221.38<br>34424 | ± | 21.36<br>541 | 9.650<br>861 | 492.75<br>07759 | ± | 65.13<br>781 | 13.21<br>922 | 380.54<br>07977 | ± | 34.38<br>215 | 9.035<br>077 | 0 | ±     | 7.8182<br>29976 | ±   | 0.315<br>756 | 4.038<br>72  | 8.351<br>238 | ±           | 0.123<br>345 | 1.476<br>964 | 8.075<br>468 | ±   | 0.436<br>537 | 5.405<br>717 | 7.786<br>041 | ±   | 0.136<br>483 | 1.752<br>925 | 8.936<br>665 | ±   | 0.184<br>574 | 2.065<br>362 | 8.567<br>885 | ±            | 0.132<br>741 | 1.549<br>289 |   |   |
| CaM-443 | Predicted protein                                    | 77.886<br>69809 | ± | 12.20<br>375 | 15.66<br>86  | 71.159<br>22172 | ± | 21.50<br>573 | 30.22<br>198 | 546.96<br>58951 | ± | 149.0<br>201 | 27.24<br>486 | 113.49<br>00892 | ± | 12.96<br>973 | 11.42<br>807 | 186.23<br>65346 | ± | 53.35<br>953 | 28.65<br>148 | 694.27<br>42047 | ± | 85.94<br>12  | 12.37<br>857 | 0 | ±     | 6.2715<br>62012 | ±   | 0.225<br>134 | 3.589<br>762 | 6.111<br>29  | ±           | 0.418<br>731 | 6.851<br>753 | 9.057<br>238 | ±   | 0.412<br>406 | 4.553<br>327 | 6.819<br>821 | ±   | 0.171<br>089 | 2.508<br>701 | 7.496<br>267 | ±   | 0.453<br>223 | 6.045<br>987 | 9.432<br>009 | ±            | 0.178<br>289 | 1.890<br>259 |   |   |
| CaM-445 | Putative uncharacterized                             | 353.66<br>38519 | ± | 69.98<br>482 | 19.78<br>851 | 215.80<br>62444 | ± | 47.20<br>144 | 21.87<br>214 | 254.69<br>46578 | ± | 43.13<br>467 | 16.93<br>584 | 212.75<br>94343 | ± | 43.22<br>274 | 20.31<br>531 | 549.78<br>33119 | ± | 175.2<br>759 | 31.88<br>09  | 191.76<br>08993 | ± | 38.90<br>176 | 20.28<br>66  | 0 | ±     | 8.4476<br>62202 | ±   | 0.282<br>507 | 3.344<br>207 | 7.731<br>952 | ±           | 0.301<br>054 | 3.893<br>634 | 7.978<br>61  | ±   | 0.247<br>267 | 3.099<br>123 | 7.714<br>299 | ±   | 0.280<br>931 | 3.641<br>686 | 9.052<br>752 | ±   | 0.467<br>627 | 5.165<br>575 | 7.563<br>933 | ±            | 0.286<br>357 | 3.785<br>828 |   |   |
| CaM-452 | Ferredoxin: nadp+ reductase                          | 1079.0<br>47002 | ± | 118.2<br>202 | 10.95<br>598 | 431.62<br>49508 | ± | 37.61<br>836 | 8.715<br>519 | 783.99<br>73452 | ± | 208.9<br>642 | 26.65<br>369 | 325.88<br>60667 | ± | 36.80<br>407 | 11.29<br>354 | 478.45<br>28715 | ± | 66.34<br>647 | 13.86<br>688 | 468.47<br>0566  | ± | 113.9<br>368 | 24.32<br>103 | 0 | ±     | 10.069<br>49346 | ±   | 0.163<br>645 | 1.625<br>159 | 8.750<br>09  | ±           | 0.122<br>895 | 1.404<br>505 | 9.582<br>907 | ±   | 0.363<br>751 | 3.795<br>834 | 8.341<br>922 | ±   | 0.166<br>25  | 1.992<br>952 | 8.892<br>865 | ±   | 0.202<br>015 | 2.271<br>648 | 8.840<br>525 | ±            | 0.376<br>513 | 4.258<br>949 |   |   |
| CaM-460 | Glyceraldehyde-3-phosphate dehydrogenase             | 194.90<br>3262  | ± | 6.192<br>452 | 3.177<br>193 | 269.42<br>74053 | ± | 14.76<br>676 | 5.480<br>793 | 129.66<br>65063 | ± | 20.97<br>483 | 16.17<br>599 | 118.81<br>49542 | ± | 4.474<br>572 | 3.766<br>001 | 466.11<br>44788 | ± | 44.00<br>241 | 9.440<br>259 | 441.85<br>91759 | ± | 88.16<br>325 | 19.95<br>279 | 0 | ±     | 7.6061<br>34678 | ±   | 0.045<br>432 | 0.597<br>306 | 8.072<br>276 | ±           | 0.080<br>367 | 0.995<br>595 | 7.005<br>97  | ±   | 0.234<br>882 | 3.352<br>602 | 6.891<br>899 | ±   | 0.053<br>804 | 0.780<br>69  | 8.860<br>328 | ±   | 0.134<br>427 | 1.517<br>18  | 8.766<br>417 | ±            | 0.308<br>471 | 3.518<br>783 |   |   |
| CaM-461 | Glyceraldehyde-3-phosphate dehydrogenase             | 100.65<br>72065 | ± | 27.41<br>809 | 27.23<br>907 | 137.05<br>10183 | ± | 23.08<br>058 | 16.84<br>087 | 59.393<br>95913 | ± | 16.39<br>252 | 27.59<br>965 | 43.093<br>98034 | ± | 4.654<br>117 | 10.79<br>992 | 64.392<br>87447 | ± | 8.401<br>992 | 13.04<br>802 | 79.674<br>63953 | ± | 11.97<br>58  | 15.03<br>088 | 0 | ±     | 6.6201<br>27046 | ±   | 0.371<br>454 | 5.610<br>978 | 7.083<br>841 | ±           | 0.257<br>173 | 3.630<br>418 | 5.851<br>719 | ±   | 0.429<br>12  | 7.333<br>223 | 5.423<br>917 | ±   | 0.153<br>469 | 2.829<br>48  | 6.000<br>315 | ±   | 0.193<br>805 | 3.229<br>911 | 6.305<br>323 | ±            | 0.214<br>748 | 3.405<br>82  |   |   |
| CaM-462 | Glyceraldehyde-3-phosphate dehydrogenase A           | 50.922<br>75153 | ± | 12.79<br>008 | 25.11<br>662 | 89.672<br>36908 | ± | 8.008<br>621 | 8.930<br>98  | 0               | ± | 0            | 0            | 40.920<br>19969 | ± | 6.542<br>041 | 15.98<br>731 | 105.91<br>85184 | ± | 30.22<br>68  | 28.53<br>778 | 173.75<br>23207 | ± | 27.46<br>277 | 15.80<br>57  | 0 | ±     | 5.6369<br>23859 | ±   | 0.388<br>375 | 6.889<br>846 | 6.482<br>829 | ±           | 0.126<br>975 | 1.958<br>64  | 0            | ±   | 0            | 0            | 5.342<br>834 | ±   | 0.225<br>147 | 4.214<br>001 | 6.690<br>188 | ±   | 0.390<br>849 | 5.842<br>118 | 7.429<br>35  | ±            | 0.221<br>121 | 2.976<br>32  |   |   |
| CaM-483 | Luminal binding protein, BiP                         | 90.116<br>09163 | ± | 17.81<br>766 | 19.77<br>189 | 88.025<br>26041 | ± | 8.930<br>682 | 10.14<br>559 | 0               | ± | 0            | 0            | 0               | ± | 0            | 0            | 0               | ± | 0            | 0            | 0               | ± | 0            | 0            | 0 | ±     | 6.4754<br>23223 | ±   | 0.279<br>339 | 4.313<br>84  | 6.454<br>972 | ±           | 0.144<br>666 | 2.241<br>15  | 0            | ±   | 0            | 0            | 0            | ±   | 0            | 0            | 0            | ±   | 0            | 0            | 0            | ±            | 0            | 0            |   |   |
| CaM-485 | Carbonic anhydrase                                   | 0               | ± | 0            | 0            | 163.95<br>64766 | ± | 32.95<br>833 | 20.10<br>188 | 0               | ± | 0            | 0            | 0               | ± | 0            | 0            | 0               | ± | 0            | 0            | 0               | ± | 0            | 0            | 0 | ±     | 0               | ±   | 0            | 0            | 7.338<br>014 | ±           | 0.286<br>865 | 3.909<br>298 | 0            | ±   | 0            | 0            | 0            | ±   | 0            | 0            | 0            | ±   | 0            | 0            | 0            | ±            | 0            | 0            |   |   |
| CaM-487 | Guanine nucleotide-binding protein subunit beta-like | 211.22<br>90344 | ± | 28.98<br>217 | 13.72<br>073 | 135.51<br>03711 | ± | 20.32<br>426 | 14.99<br>831 | 0               | ± | 0            | 0            | 84.263<br>12311 | ± | 19.79<br>571 | 23.49<br>273 | 0               | ± | 0            | 0            | 0               | ± | 0            | 0            | 0 | ±     | 7.7130<br>5846  | ±   | 0.206<br>839 | 2.681<br>67  | 7.071<br>513 | ±           | 0.215<br>302 | 3.044<br>636 | 0            | ±   | 0            | 0            | 6.367<br>279 | ±   | 0.366<br>871 | 5.761<br>811 | 0            | ±   | 0            | 0            | 0            | ±            | 0            | 0            |   |   |

**Supplementary Table S4.** One-way ANOVA of the data was done using MeV (Multi Experiment Viewer) software to determine the statistically significant ( $p < 0.05$ ) differentially regulated protein spots.

| Spot ID | Unstressed |            | 24 h      |            | 48 h      |            | 72 h       |            | 96 h       |            | 120 h     |            | F ratio   | SS Group | SS Error | df(Groups) | df (error) | p value     | Are means signif. different? (P < 0.05) | Identification                                         |
|---------|------------|------------|-----------|------------|-----------|------------|------------|------------|------------|------------|-----------|------------|-----------|----------|----------|------------|------------|-------------|-----------------------------------------|--------------------------------------------------------|
|         | Mean       | SD         | Mean      | SD         | Mean      | SD         | Mean       | SD         | Mean       | SD         | Mean      | SD         |           |          |          |            |            |             |                                         |                                                        |
| CaM-9   | 9.603208   | ± 0.425321 | 8.412229  | ± 0.2521   | 9.885127  | ± 0.186657 | 9.57389    | ± 0.293719 | 7.769659   | ± 0.258619 | 8.997939  | ± 0.046608 | 27.550543 | 9.978338 | 0.869239 | 5          | 12         | 3.48922E-06 | Yes                                     | Putative uncharacterized protein                       |
| CaM-21  | 9.932819   | ± 0.298015 | 9.25478   | ± 0.282887 | 10.457976 | ± 0.128468 | 11.1069765 | ± 0.217513 | 11.0436735 | ± 0.156175 | 11.422005 | ± 0.136738 | 44.130737 | 10.14057 | 0.551483 | 5          | 12         | 2.57991E-07 | Yes                                     | Chlorophyll a/b-binding protein AB96                   |
| CaM-22  | 9.99126    | ± 0.265601 | 9.46384   | ± 0.333331 | 11.149154 | ± 0.193462 | 11.178841  | ± 0.094737 | 10.681541  | ± 0.266912 | 11.497771 | ± 0.358806 | 25.978151 | 9.266411 | 0.85608  | 5          | 12         | 4.79277E-06 | Yes                                     | Chlorophyll a/b-binding protein 3 precursor            |
| CaM-24  | 0          | ± 0        | 0         | ± 0        | 6.719216  | ± 0.307808 | 7.336218   | ± 0.085858 | 8.986362   | ± 0.304598 | 8.658089  | ± 0.187876 | 1363.786  | 261.6141 | 0.46039  | 5          | 12         | 4.44089E-16 | Yes                                     | Putative uncharacterized protein                       |
| CaM-39  | 6.026426   | ± 0.290237 | 0         | ± 0        | 0         | ± 0        | 0          | ± 0        | 0          | ± 0        | 5.777553  | ± 0.185619 | 1409.6346 | 139.4268 | 0.237384 | 5          | 12         | 3.33067E-16 | Yes                                     | Putative 60S ribosomal protein L1                      |
| CaM-43  | 7.897615   | ± 0.280701 | 0         | ± 0        | 0         | ± 0        | 0          | ± 0        | 0          | ± 0        | 6.896318  | ± 0.321173 | 1453.3905 | 220.3644 | 0.36389  | 5          | 12         | 3.33067E-16 | Yes                                     | Ribulose biphosphate carboxylase large chain           |
| CaM-54  | 0          | ± 0        | 0         | ± 0        | 10.442727 | ± 0.256813 | 0          | ± 0        | 0          | ± 0        | 0         | ± 0        | 4960.3667 | 272.6264 | 0.131906 | 5          | 12         | 0           | Yes                                     | Activator of spomin                                    |
| CaM-56  | 6.435103   | ± 0.351706 | 0         | ± 0        | 0         | ± 0        | 0          | ± 0        | 0          | ± 0        | 7.2823462 | ± 0.129311 | 1617.2704 | 189.2452 | 0.280836 | 5          | 12         | 1.11022E-16 | Yes                                     | Hypothetical protein OSJNBa0075N02.148                 |
| CaM-64  | 0          | ± 0        | 8.329746  | ± 0.459339 | 8.521224  | ± 0.283649 | 8.313427   | ± 0.341677 | 0          | ± 0        | 0         | ± 0        | 931.0425  | 316.7035 | 0.816384 | 5          | 12         | 4.21885E-15 | Yes                                     | Hypothetical protein P0415D04.53                       |
| CaM-69  | 9.405328   | ± 0.449908 | 9.070352  | ± 0.058313 | 10.222072 | ± 0.243425 | 10.871314  | ± 0.095856 | 10.121033  | ± 0.271435 | 9.894431  | ± 0.137094 | 19.862555 | 6.070227 | 0.733468 | 5          | 12         | 1.99029E-05 | Yes                                     | Chlorophyll A-B binding protein                        |
| CaM-71  | 9.365312   | ± 0.245839 | 8.130847  | ± 0.210996 | 9.872794  | ± 0.144933 | 9.425038   | ± 0.129063 | 10.6705065 | ± 0.223949 | 9.448925  | ± 0.481366 | 28.909212 | 10.22629 | 0.848972 | 5          | 12         | 2.6866E-06  | Yes                                     | light-harvesting complex II protein Lhcb3              |
| CaM-73  | 8.911433   | ± 0.43961  | 8.767699  | ± 0.512194 | 10.301246 | ± 0.090214 | 9.898762   | ± 0.092868 | 10.757319  | ± 0.203063 | 9.850651  | ± 0.294584 | 18.102072 | 9.056721 | 1.200754 | 5          | 12         | 3.22008E-05 | Yes                                     | Actin (Fragment)                                       |
| CaM-74  | 10.123119  | ± 0.266514 | 9.636769  | ± 0.33176  | 11.048905 | ± 0.272367 | 11.522855  | ± 0.162317 | 11.379059  | ± 0.097039 | 12.598586 | ± 0.175705 | 62.472404 | 16.75892 | 0.643827 | 5          | 12         | 3.58215E-08 | Yes                                     | Light-harvesting chlorophyll-a/b binding protein Lhcb1 |
| CaM-75  | 9.516501   | ± 0.399097 | 9.268111  | ± 0.298572 | 10.612512 | ± 0.192383 | 11.595878  | ± 0.286348 | 11.301647  | ± 0.398572 | 11.645138 | ± 0.328284 | 31.256876 | 16.51561 | 1.26812  | 5          | 12         | 1.75379E-06 | Yes                                     | Chlorophyll a/b binding protein                        |
| CaM-78  | 9.561337   | ± 0.344411 | 8.398349  | ± 0.365994 | 8.503531  | ± 0.307033 | 9.276596   | ± 0.451636 | 8.4918165  | ± 0.369396 | 6.9855304 | ± 0.208565 | 19.831955 | 12.07713 | 1.461536 | 5          | 12         | 2.00636E-05 | Yes                                     | Chlorophyll a/b binding protein                        |
| CaM-80  | 8.079182   | ± 0.07713  | 0         | ± 0        | 9.590534  | ± 0.325762 | 6.8822     | ± 0.316902 | 8.3006935  | ± 0.038788 | 0         | ± 0        | 1575.1632 | 280.9062 | 0.428003 | 5          | 12         | 2.22045E-16 | Yes                                     | ATP synthase beta subunit (Fragment)                   |
| CaM-85  | 0          | ± 0        | 5.6428695 | ± 0.385567 | 0         | ± 0        | 0          | ± 0        | 0          | ± 0        | 0         | ± 0        | 642.5728  | 79.60492 | 0.297323 | 5          | 12         | 3.87468E-14 | Yes                                     | Calcineurin-like phosphoesterase family protein        |
| CaM-94  | 7.4421234  | ± 0.081479 | 6.819447  | ± 0.202359 | 7.505081  | ± 0.225871 | 8.347675   | ± 0.386183 | 6.268145   | ± 0.369728 | 7.083761  | ± 0.11861  | 22.437126 | 7.451185 | 0.79702  | 5          | 12         | 1.04855E-05 | Yes                                     | Chaperonin 60 alpha subunit                            |
| CaM-99  | 6.5966988  | ± 0.411618 | 7.7958817 | ± 0.43074  | 6.4077945 | ± 0.299652 | 5.8768144  | ± 0.404746 | 5.5532966  | ± 0.14748  | 0         | ± 0        | 214.71172 | 112.7822 | 1.260654 | 5          | 12         | 2.63749E-11 | Yes                                     | Chaperone DnaK                                         |
| CaM-112 | 0          | ± 0        | 0         | ± 0        | 0         | ± 0        | 0          | ± 0        | 0          | ± 0        | 8.5443125 | ± 0.254103 | 3392      | 182.5132 | 0.129137 | 5          | 12         | 0           | Yes                                     | Putative uncharacterized protein                       |
| CaM-115 | 5.636827   | ± 0.361348 | 0         | ± 0        | 0         | ± 0        | 0          | ± 0        | 0          | ± 0        | 0         | ± 0        | 730.02783 | 79.43455 | 0.261145 | 5          | 12         | 1.80966E-14 | Yes                                     | Trypsin inhibitor, chain B (fragments)                 |
| CaM-122 | 8.290085   | ± 0.200794 | 8.5388365 | ± 0.214333 | 7.9365754 | ± 0.244431 | 9.942555   | ± 0.43069  | 9.785783   | ± 0.359586 | 0         | ± 0        | 541.3469  | 207.8766 | 0.921597 | 5          | 12         | 1.07803E-13 | Yes                                     | Ribulose biphosphate carboxylase large chain           |

|         |           |   |          |           |   |          |           |   |          |           |   |          |           |   |          |           |   |          |           |          |          |   |    |             |     |                                                         |
|---------|-----------|---|----------|-----------|---|----------|-----------|---|----------|-----------|---|----------|-----------|---|----------|-----------|---|----------|-----------|----------|----------|---|----|-------------|-----|---------------------------------------------------------|
| CaM-125 | 7.216932  | ± | 0.476605 | 5.9195113 | ± | 0.316839 | 8.422452  | ± | 0.302747 | 7.250547  | ± | 0.369267 | 4.8617253 | ± | 0.252168 | 5.6859016 | ± | 0.440419 | 37.347885 | 25.30664 | 1.626222 | 5 | 12 | 6.56145E-07 | Yes | Oxygen-evolving enhancer protein 1                      |
| CaM-127 | 10.800008 | ± | 0.33304  | 9.200338  | ± | 0.128142 | 10.475501 | ± | 0.454651 | 10.290149 | ± | 0.335508 | 9.636501  | ± | 0.269075 | 9.013782  | ± | 0.069052 | 18.129438 | 7.913189 | 1.047559 | 5 | 12 | 3.19513E-05 | Yes | PSI type III chlorophyll a/b-binding protein (imported) |
| CaM-138 | 5.170191  | ± | 0.266804 | 0         | ± | 0        | 0         | ± | 0        | 0         | ± | 0        | 0         | ± | 0        | 0         | ± | 0        | 1126.5496 | 66.82718 | 0.142369 | 5 | 12 | 1.33227E-15 | Yes | Chromosome chr17 scaffold_16                            |
| CaM-141 | 5.2336073 | ± | 0.194937 | 0         | ± | 0        | 5.6624513 | ± | 0.238545 | 0         | ± | 0        | 0         | ± | 0        | 0         | ± | 0        | 1504.6766 | 119      | 0.189808 | 5 | 12 | 2.22045E-16 | Yes | Phosphoglycerate kinase                                 |
| CaM-147 | 6.812485  | ± | 0.340437 | 7.084189  | ± | 0.46597  | 8.009057  | ± | 0.109427 | 7.299478  | ± | 0.457843 | 6.8642173 | ± | 0.321782 | 5.846233  | ± | 0.377199 | 11.237316 | 7.49569  | 1.600886 | 5 | 12 | 0.000340961 | Yes | ATP synthase subunit beta, chloroplastic                |
| CaM-150 | 5.562042  | ± | 0.401376 | 0         | ± | 0        | 0         | ± | 0        | 6.807993  | ± | 0.390625 | 0         | ± | 0        | 0         | ± | 0        | 594.266   | 155.3464 | 0.627381 | 5 | 12 | 6.17284E-14 | Yes | Chaperonin 60 alpha subunit                             |
| CaM-155 | 5.772982  | ± | 0.09133  | 0         | ± | 0        | 0         | ± | 0        | 0         | ± | 0        | 5.5956216 | ± | 0.091356 | 0         | ± | 0        | 9297.633  | 129.2923 | 0.033374 | 5 | 12 | 0           | Yes | Dynein-1-alpha heavy chain                              |
| CaM-157 | 6.4686546 | ± | 0.342049 | 5.580719  | ± | 0.324423 | 5.7498984 | ± | 0.234885 | 0         | ± | 0        | 0         | ± | 0        | 0         | ± | 0        | 690.9743  | 159.7407 | 0.554836 | 5 | 12 | 2.5091E-14  | Yes | Putative GroEL protein chaperonin 60kDa                 |
| CaM-161 | 8.93267   | ± | 0.312771 | 7.9911923 | ± | 0.404543 | 9.76657   | ± | 0.200155 | 9.763427  | ± | 0.299553 | 9.522557  | ± | 0.478401 | 8.704226  | ± | 0.28617  | 12.696846 | 7.428036 | 1.404072 | 5 | 12 | 0.000190034 | Yes | ATP synthase beta subunit (Fragment)                    |
| CaM-162 | 7.813685  | ± | 0.189524 | 7.6816077 | ± | 0.40144  | 7.8042636 | ± | 0.221216 | 6.423578  | ± | 0.360876 | 8.6219    | ± | 0.392819 | 9.423976  | ± | 0.210416 | 31.72158  | 15.19524 | 1.149645 | 5 | 12 | 1.61742E-06 | Yes | ATP synthase beta subunit (Fragment)                    |
| CaM-171 | 6.38756   | ± | 0.388093 | 4.7402024 | ± | 0.267125 | 6.4326167 | ± | 0.300305 | 5.1022644 | ± | 0.163776 | 6.808237  | ± | 0.240923 | 0         | ± | 0        | 292.688   | 96.83617 | 0.794043 | 5 | 12 | 4.19975E-12 | Yes | Unknown protein                                         |
| CaM-182 | 7.5754046 | ± | 0.245034 | 7.7550035 | ± | 0.215775 | 7.9807205 | ± | 0.374034 | 8.371748  | ± | 0.386514 | 9.706346  | ± | 0.216997 | 9.242935  | ± | 0.407578 | 21.75396  | 11.04201 | 1.218207 | 5 | 12 | 1.23482E-05 | Yes | Ferritin                                                |
| CaM-183 | 7.950537  | ± | 0.354491 | 0         | ± | 0        | 6.729875  | ± | 0.342634 | 0         | ± | 0        | 0         | ± | 0        | 0         | ± | 0        | 1075.032  | 217.7495 | 0.486124 | 5 | 12 | 1.77636E-15 | Yes | Oxygen-evolving enhancer protein 2                      |
| CaM-187 | 9.391894  | ± | 0.432391 | 9.603595  | ± | 0.249946 | 9.223733  | ± | 0.214144 | 10.827149 | ± | 0.131417 | 11.160247 | ± | 0.371089 | 11.695248 | ± | 0.14282  | 41.53925  | 16.29266 | 0.941336 | 5 | 12 | 3.62367E-07 | Yes | Chlorophyll a/b binding protein                         |
| CaM-189 | 5.6312637 | ± | 0.370319 | 0         | ± | 0        | 7.5610924 | ± | 0.335778 | 0         | ± | 0        | 0         | ± | 0        | 0         | ± | 0        | 862.6038  | 179.6246 | 0.499765 | 5 | 12 | 6.66134E-15 | Yes | ATP synthase subunit alpha                              |
| CaM-191 | 9.477189  | ± | 0.42013  | 8.772186  | ± | 0.298595 | 10.241011 | ± | 0.348818 | 9.035951  | ± | 0.354627 | 10.268399 | ± | 0.067502 | 9.811376  | ± | 0.345716 | 10.852541 | 5.762506 | 1.274357 | 5 | 12 | 0.000401719 | Yes | Ferritin                                                |
| CaM-196 | 9.545783  | ± | 0.365355 | 9.617412  | ± | 0.261794 | 9.77369   | ± | 0.355727 | 10.240451 | ± | 0.237589 | 9.381851  | ± | 0.410075 | 8.683509  | ± | 0.02291  | 8.516351  | 3.929566 | 1.107395 | 5 | 12 | 0.001211116 | Yes | Oxygen-evolving enhancer protein 1                      |
| CaM-205 | 5.118655  | ± | 0.434434 | 5.656958  | ± | 0.500305 | 5.9652495 | ± | 0.190721 | 0         | ± | 0        | 0         | ± | 0        | 0         | ± | 0        | 356.48157 | 141.2298 | 0.950825 | 5 | 12 | 1.30029E-12 | Yes | ATP synthase subunit beta                               |
| CaM-206 | 7.8565593 | ± | 0.082276 | 7.7123375 | ± | 0.22321  | 8.132972  | ± | 0.294354 | 8.071847  | ± | 0.339951 | 8.575703  | ± | 0.217328 | 8.068541  | ± | 0.248874 | 4.237996  | 1.299556 | 0.735945 | 5 | 12 | 0.018806586 | Yes | Phosphoribulokinase                                     |
| CaM-207 | 5.99663   | ± | 0.333324 | 7.073139  | ± | 0.394419 | 6.4465218 | ± | 0.256908 | 6.1208706 | ± | 0.248614 | 7.2649827 | ± | 0.262336 | 6.410048  | ± | 0.22546  | 9.141288  | 3.916544 | 1.028269 | 5 | 12 | 0.000883571 | Yes | ATP synthase subunit alpha                              |
| CaM-208 | 6.0402856 | ± | 0.367113 | 6.8729725 | ± | 0.382983 | 6.618665  | ± | 0.413027 | 6.459953  | ± | 0.232042 | 7.2553315 | ± | 0.332101 | 0         | ± | 0        | 220.0921  | 113.0127 | 1.232349 | 5 | 12 | 2.278E-11   | Yes | Putative 60S acidic ribosomal protein P0                |
| CaM-209 | 6.1603374 | ± | 0.327532 | 7.5777245 | ± | 0.421147 | 8.169686  | ± | 0.425697 | 6.9411416 | ± | 0.2192   | 6.9400253 | ± | 0.336861 | 7.695522  | ± | 0.396954 | 11.605565 | 7.591554 | 1.569913 | 5 | 12 | 0.00029262  | Yes | Putative 60S acidic ribosomal protein P0                |
| CaM-210 | 7.06131   | ± | 0.070939 | 7.431667  | ± | 0.441126 | 8.008937  | ± | 0.104328 | 7.4029765 | ± | 0.410119 | 7.893064  | ± | 0.040185 | 7.730984  | ± | 0.345837 | 4.513447  | 1.880319 | 0.999849 | 5 | 12 | 0.015130141 | Yes | Fructose-bisphosphate aldolase                          |
| CaM-214 | 6.8118367 | ± | 0.26817  | 7.7781506 | ± | 0.12848  | 0         | ± | 0        | 7.4880986 | ± | 0.356823 | 7.3509727 | ± | 0.313653 | 0         | ± | 0        | 832.7678  | 217.9928 | 0.628246 | 5 | 12 | 8.21565E-15 | Yes | Glutamate-ammonia ligase (EC 6.3.1.2) delta precursor   |
| CaM-216 | 6.910494  | ± | 0.149641 | 7.6971774 | ± | 0.121985 | 7.3845506 | ± | 0.264422 | 7.9002166 | ± | 0.376091 | 7.608177  | ± | 0.219701 | 7.132965  | ± | 0.233802 | 7.00341   | 2.051814 | 0.703137 | 5 | 12 | 0.002800377 | Yes | Glutamate-ammonia ligase (EC 6.3.1.2) delta precursor   |
| CaM-218 | 6.605952  | ± | 0.270509 | 7.916162  | ± | 0.27273  | 0         | ± | 0        | 7.8205514 | ± | 0.33356  | 7.380938  | ± | 0.378987 | 8.052318  | ± | 0.219993 | 390.83725 | 146.8398 | 0.901694 | 5 | 12 | 7.51843E-13 | Yes | Glutamine synthetase                                    |
| CaM-221 | 9.564595  | ± | 0.21136  | 8.412441  | ± | 0.199437 | 9.623633  | ± | 0.319532 | 8.297797  | ± | 0.058116 | 10.038039 | ± | 0.25536  | 10.505553 | ± | 0.144203 | 50.834    | 11.68882 | 0.551858 | 5 | 12 | 1.16062E-07 | Yes | ATP synthase beta subunit (Fragment)                    |
| CaM-222 | 6.8386035 | ± | 0.313385 | 6.8815665 | ± | 0.177394 | 6.0190606 | ± | 0.254207 | 6.539026  | ± | 0.12531  | 7.833365  | ± | 0.045034 | 5.923191  | ± | 0.231213 | 32.884907 | 7.275508 | 0.53098  | 5 | 12 | 1.32691E-06 | Yes | ATP synthase subunit beta                               |
| CaM-223 | 7.729629  | ± | 0.325763 | 7.113209  | ± | 0.204455 | 7.0239677 | ± | 0.231628 | 6.9305363 | ± | 0.429745 | 7.6212564 | ± | 0.275345 | 7.5357413 | ± | 0.342114 | 3.648903  | 1.760937 | 1.158225 | 5 | 12 | 0.030729257 | Yes | Putative glutamate-tRNA ligase                          |
| CaM-226 | 7.0229416 | ± | 0.097117 | 7.445812  | ± | 0.536287 | 7.7352605 | ± | 0.065156 | 9.725231  | ± | 0.323848 | 8.093498  | ± | 0.247183 | 9.4482155 | ± | 0.315324 | 38.457607 | 18.16118 | 1.133373 | 5 | 12 | 5.57456E-07 | Yes | ATPase beta subunit (Fragment)                          |

|         |           |   |          |           |   |          |           |   |          |           |   |          |           |   |          |            |   |          |           |          |          |   |    |             |     |                                                            |
|---------|-----------|---|----------|-----------|---|----------|-----------|---|----------|-----------|---|----------|-----------|---|----------|------------|---|----------|-----------|----------|----------|---|----|-------------|-----|------------------------------------------------------------|
| CaM-240 | 9.914124  | ± | 0.377788 | 9.709861  | ± | 0.502626 | 8.707967  | ± | 0.088646 | 8.264376  | ± | 0.330836 | 8.259547  | ± | 0.351212 | 8.653915   | ± | 0.132179 | 14.289778 | 7.781838 | 1.306977 | 5 | 12 | 0.000106455 | Yes | 40S ribosomal protein S12                                  |
| CaM-246 | 10.410758 | ± | 0.27957  | 9.539444  | ± | 0.215782 | 10.390157 | ± | 0.248877 | 9.807682  | ± | 0.193951 | 10.201241 | ± | 0.154851 | 9.548566   | ± | 0.271153 | 9.091077  | 2.437778 | 0.643561 | 5 | 12 | 0.000905705 | Yes | Putative serine/threonine kinase                           |
| CaM-247 | 10.323692 | ± | 0.298256 | 9.1133    | ± | 0.298389 | 10.763865 | ± | 0.138044 | 9.215666  | ± | 0.284621 | 8.401645  | ± | 0.425444 | 7.769054   | ± | 0.198773 | 46.039505 | 19.12832 | 0.997143 | 5 | 12 | 2.0325E-07  | Yes | Membrane protein CH1-like                                  |
| CaM-254 | 0         | ± | 0        | 0         | ± | 0        | 7.6089835 | ± | 0.349399 | 6.7742386 | ± | 0.219173 | 6.9647317 | ± | 0.13743  | 0          | ± | 0        | 1454.0387 | 229.0157 | 0.378008 | 5 | 12 | 3.33067E-16 | Yes | ATP synthase gamma chain                                   |
| CaM-257 | 8.25543   | ± | 0.390722 | 7.7553706 | ± | 0.268396 | 8.120919  | ± | 0.369518 | 8.017285  | ± | 0.227075 | 8.552018  | ± | 0.2021   | 8.654601   | ± | 0.380238 | 3.4117472 | 1.700847 | 1.196464 | 5 | 12 | 0.03784779  | Yes | Plastidic aldolase                                         |
| CaM-263 | 6.6265683 | ± | 0.230221 | 9.7926035 | ± | 0.363082 | 6.474798  | ± | 0.100527 | 0         | ± | 0        | 7.292593  | ± | 0.133525 | 7.2174935  | ± | 0.073942 | 887.9324  | 161.4792 | 0.436463 | 5 | 12 | 5.55112E-15 | Yes | OSJNBb0085H11.1 protein                                    |
| CaM-267 | 0         | ± | 0        | 0         | ± | 0        | 6.951384  | ± | 0.267582 | 0         | ± | 0        | 4.749954  | ± | 4.118491 | 5.8863626  | ± | 5.104154 | 4.5101175 | 161.9356 | 86.17191 | 5 | 12 | 0.015169316 | Yes | Hypothetical protein F26P21.180                            |
| CaM-269 | 6.1253304 | ± | 0.378052 | 0         | ± | 0        | 5.469561  | ± | 0.197302 | 0         | ± | 0        | 0         | ± | 0        | 8.513032   | ± | 0.221124 | 1131.4114 | 217.5582 | 0.461494 | 5 | 12 | 1.33227E-15 | Yes | ATP synthase subunit alpha                                 |
| CaM-271 | 8.648853  | ± | 0.249809 | 7.0495706 | ± | 0.444854 | 8.231373  | ± | 0.266143 | 7.980329  | ± | 0.317699 | 9.110553  | ± | 0.372221 | 8.622403   | ± | 0.040375 | 16.035912 | 7.647022 | 1.144484 | 5 | 12 | 5.977E-05   | Yes | H <sup>+</sup> -transporting two-sector ATPase-alpha chain |
| CaM-272 | 7.529821  | ± | 0.290092 | 6.278463  | ± | 0.459052 | 7.2541785 | ± | 0.230127 | 7.011789  | ± | 0.427273 | 8.432578  | ± | 0.224308 | 7.8077245  | ± | 0.233063 | 15.181009 | 8.033733 | 1.270071 | 5 | 12 | 7.87451E-05 | Yes | ATP synthase CF1 alpha subunit                             |
| CaM-283 | 9.480482  | ± | 0.415844 | 9.142625  | ± | 0.232834 | 8.253951  | ± | 0.389867 | 9.235078  | ± | 0.318945 | 8.582005  | ± | 0.303645 | 8.501159   | ± | 0.408582 | 5.734197  | 3.536083 | 1.479998 | 5 | 12 | 0.006252549 | Yes | 40S ribosomal protein S12                                  |
| CaM-290 | 7.309196  | ± | 0.197093 | 8.228299  | ± | 0.32383  | 7.848063  | ± | 0.412169 | 8.954298  | ± | 0.509768 | 8.7475    | ± | 0.270607 | 9.553581   | ± | 0.471005 | 13.566553 | 9.819145 | 1.737063 | 5 | 12 | 0.000137545 | Yes | Intronic ORF; similar to LAGLIDADG endonuclease            |
| CaM-294 | 8.742703  | ± | 0.307524 | 10.027801 | ± | 0.242775 | 9.468259  | ± | 0.216236 | 9.052751  | ± | 0.385479 | 9.056861  | ± | 0.431458 | 8.194781   | ± | 0.397958 | 10.108934 | 5.841191 | 1.386779 | 5 | 12 | 0.000558801 | Yes | Putative PSII-P protein                                    |
| CaM-295 | 8.5163965 | ± | 0.176525 | 8.42756   | ± | 0.262882 | 8.568124  | ± | 0.324128 | 8.26415   | ± | 0.146782 | 8.578538  | ± | 0.267413 | 7.662104   | ± | 0.272885 | 5.91809   | 1.83879  | 0.745696 | 5 | 12 | 0.005528897 | Yes | ATP synthase subunit alpha                                 |
| CaM-299 | 8.922279  | ± | 0.460035 | 9.108951  | ± | 0.120351 | 9.491695  | ± | 0.153642 | 8.767903  | ± | 0.276726 | 9.67284   | ± | 0.068629 | 10.477836  | ± | 0.104509 | 20.60166  | 5.870297 | 0.683863 | 5 | 12 | 1.64413E-05 | Yes | Histone acetyltransferase GCN5                             |
| CaM-301 | 6.775804  | ± | 0.417758 | 7.6553197 | ± | 0.432989 | 5.5144973 | ± | 0.219843 | 7.280419  | ± | 0.235537 | 7.4387913 | ± | 0.401478 | 7.6998463  | ± | 0.388221 | 15.855255 | 10.27566 | 1.55542  | 5 | 12 | 6.32899E-05 | Yes | Proteasome subunit alpha type                              |
| CaM-308 | 6.868197  | ± | 0.172882 | 7.387281  | ± | 0.437921 | 6.852735  | ± | 0.31254  | 8.310295  | ± | 0.409852 | 8.761737  | ± | 0.139507 | 8.28452    | ± | 0.329105 | 19.532253 | 10.01182 | 1.230189 | 5 | 12 | 2.17205E-05 | Yes | Fructose-bisphosphate aldolase 1                           |
| CaM-310 | 8.849694  | ± | 0.424194 | 9.10432   | ± | 0.063535 | 9.22963   | ± | 0.101136 | 9.841937  | ± | 0.117984 | 8.94322   | ± | 0.184219 | 8.668774   | ± | 0.249105 | 9.946508  | 2.520743 | 0.608232 | 5 | 12 | 0.000602046 | Yes | Fructose-bisphosphate aldolase (EC 4.1.2.13) precursor     |
| CaM-311 | 4.4754605 | ± | 0.168728 | 0         | ± | 0        | 6.427797  | ± | 0.253044 | 6.7606926 | ± | 0.189896 | 5.9967537 | ± | 0.288436 | 0          | ± | 0        | 845.0956  | 149.1286 | 0.423513 | 5 | 12 | 7.54952E-15 | Yes | ATP synthase CF1 alpha subunit                             |
| CaM-316 | 5.499235  | ± | 0.139229 | 0         | ± | 0        | 0         | ± | 0        | 0         | ± | 0        | 5.9317565 | ± | 0.36689  | 0          | ± | 0        | 1020.4222 | 130.9482 | 0.307986 | 5 | 12 | 2.44249E-15 | Yes | ATP synthase subunit alpha                                 |
| CaM-319 | 0         | ± | 0        | 0         | ± | 0        | 0         | ± | 0        | 0         | ± | 0        | 0         | ± | 0        | 11.1937685 | ± | 0.088763 | 47710.168 | 313.2512 | 0.015758 | 5 | 12 | 0           | Yes | Putative ferredoxin-NADP(H) oxidoreductase                 |
| CaM-322 | 6.5056458 | ± | 0.278802 | 0         | ± | 0        | 6.0317435 | ± | 0.170642 | 0         | ± | 0        | 0         | ± | 0        | 0          | ± | 0        | 1769.1051 | 157.523  | 0.213699 | 5 | 12 | 1.11022E-16 | Yes | Phosphoglycerate kinase                                    |
| CaM-323 | 6.7099833 | ± | 0.307219 | 6.485344  | ± | 0.382167 | 6.661573  | ± | 0.384602 | 5.9739137 | ± | 0.220448 | 6.079723  | ± | 0.346877 | 0          | ± | 0        | 222.20522 | 103.1912 | 1.11455  | 5 | 12 | 2.15268E-11 | Yes | Putative uncharacterized protein                           |
| CaM-335 | 6.2520657 | ± | 0.404054 | 0         | ± | 0        | 5.151427  | ± | 0.28412  | 5.9518604 | ± | 0.206552 | 6.485399  | ± | 0.309258 | 0          | ± | 0        | 455.5965  | 145.141  | 0.764576 | 5 | 12 | 3.01537E-13 | Yes | ATP synthase subunit alpha                                 |
| CaM-346 | 6.655455  | ± | 0.244607 | 5.5995574 | ± | 0.377833 | 5.815538  | ± | 0.368728 | 5.400726  | ± | 0.21004  | 6.4921074 | ± | 0.497582 | 6.5138936  | ± | 0.441368 | 6.333008  | 4.354267 | 1.650123 | 5 | 12 | 0.004225173 | Yes | Putative uncharacterized protein                           |
| CaM-376 | 8.65673   | ± | 0.369059 | 7.4390163 | ± | 0.374387 | 7.4177594 | ± | 0.3616   | 6.7082653 | ± | 0.277557 | 8.121991  | ± | 0.407021 | 8.026268   | ± | 0.302074 | 11.300929 | 6.979055 | 1.482155 | 5 | 12 | 0.000331982 | Yes | Ferredoxin-NADP reductase                                  |
| CaM-382 | 6.444095  | ± | 0.377617 | 6.63969   | ± | 0.380661 | 6.4086113 | ± | 0.260184 | 0         | ± | 0        | 7.340215  | ± | 0.361646 | 6.86865    | ± | 0.273926 | 246.68831 | 115.3302 | 1.122034 | 5 | 12 | 1.1587E-11  | Yes | ATP synthase subunit alpha                                 |
| CaM-    | 6.2872863 | ± | 0.210432 | 6.928101  | ± | 0.101229 | 7.1803207 | ± | 0.216018 | 7.1872077 | ± | 0.185258 | 7.087711  | ± | 0.38715  | 0          | ± | 0        | 512.56946 | 121.9053 | 0.570796 | 5 | 12 | 1.49325E-13 | Yes | ATP synthase subunit                                       |



**Supplementary Table S5.** List of identified proteins with their eMPAI (exponentially Modified Protein Abundance Index) values.

| Spot No  | Identification                                | No of identifications (peptide with ion score $p < 0.05$ )                                               | eMPAI | Summation of emPAI | mol fraction | % mol fraction |
|----------|-----------------------------------------------|----------------------------------------------------------------------------------------------------------|-------|--------------------|--------------|----------------|
| CaM-112* | Putative uncharacterized protein              | Putative uncharacterized protein (Fragment) Tax_Id=3827 [Cicer arietinum]                                | 0.22  | 0.35               | 0.628571429  | 62.85714286    |
|          |                                               | Chlorophyll A/B binding protein Tax_Id=114476 [Gardenia jasminoides]                                     | 0.13  |                    | 0.371428571  | 37.14285714    |
| CaM-121* | Ribulose bisphosphate carboxylase large chain | Ribulose bisphosphate carboxylase large chain (Fragment) Tax_Id=28975 [Hypseocharis sp. Beck s.n]        | 0.07  | 0.54               | 0.12962963   | 12.96296296    |
|          |                                               | Ribulose bisphosphate carboxylase large chain (Fragment) Tax_Id=203790 [Anarthria prolifera]             | 0.08  |                    | 0.148148148  | 14.81481481    |
|          |                                               | Ribulose bisphosphate carboxylase large chain (Fragment) Tax_Id=160682 [Asterella lindenberiana]         | 0.16  |                    | 0.296296296  | 29.62962963    |
|          |                                               | Ribulose bisphosphate carboxylase large chain (Fragment) Tax_Id=124814 [Salacia undulata]                | 0.07  |                    | 0.12962963   | 12.96296296    |
|          |                                               | Ribulose bisphosphate carboxylase large chain (Fragment) Tax_Id=472498 [Aspalathus shawii subsp. shawii] | 0.16  |                    | 0.296296296  | 29.62962963    |
|          |                                               |                                                                                                          |       |                    |              |                |
| CaM-122* | Ribulose bisphosphate carboxylase large chain | Ribulose bisphosphate carboxylase large chain Tax_Id=3827 [Cicer arietinum]                              | 0.15  | 0.8                | 0.1875       | 18.75          |
|          |                                               | Ribulose bisphosphate carboxylase large chain (Fragment) Tax_Id=160682 [Asterella lindenberiana]         | 0.34  |                    | 0.425        | 42.5           |
|          |                                               | Ribulose bisphosphate carboxylase large chain (Fragment) Tax_Id=126692 [Osmyxylon novoguineense]         | 0.08  |                    | 0.1          | 10             |
|          |                                               | Ribulose bisphosphate carboxylase large chain (Fragment) Tax_Id=221308 [Trichomanes ankersii]            | 0.08  |                    | 0.1          | 10             |
|          |                                               | Ribulose bisphosphate carboxylase large chain (Fragment) Tax_Id=52857 [Stephanostema stenocarpum]        | 0.07  |                    | 0.0875       | 8.75           |
|          |                                               | Ribulose bisphosphate carboxylase large chain (Fragment) Tax_Id=120586 [Dacrydium araucarioides]         | 0.08  |                    | 0.1          | 10             |
| CaM-138* | Chromosome chr17 scaffold_16                  | Chromosome chr17 scaffold_16, whole genome shotgun sequence Tax_Id=29760 [Vitis vinifera]                | 0.11  | 0.21               | 0.523809524  | 52.38095238    |
|          |                                               | Putative uncharacterized protein Tax_Id=39946 [Oryza sativa subsp. indica]                               | 0.04  |                    | 0.19047619   | 19.04761905    |
|          |                                               | ATP synthase subunit beta Tax_Id=37502 [Polytomella sp. Pringsheim 198.80]                               | 0.06  |                    | 0.285714286  | 28.57142857    |
| CaM-141* | Phosphoglycerate kinase                       | Phosphoglycerate kinase Tax_Id=3988 [Ricinus communis]                                                   | 0.15  | 0.77               | 0.194805195  | 19.48051948    |



|          |                                          |                                                                                                               |      |      |             |             |
|----------|------------------------------------------|---------------------------------------------------------------------------------------------------------------|------|------|-------------|-------------|
|          |                                          | Phosphoglycerate kinase Tax_Id=3695 [Populus trichocarpa x Populus deltoides]                                 | 0.07 |      | 0.090909091 | 9.090909091 |
|          |                                          | Phosphoglycerate kinase (Fragment) Tax_Id=29760 [Vitis vinifera]                                              | 0.18 |      | 0.233766234 | 23.37662338 |
|          |                                          | Phosphoglycerate kinase Tax_Id=3880 [Medicago truncatula]                                                     | 0.3  |      | 0.38961039  | 38.96103896 |
|          |                                          | ATP synthase subunit beta (Fragment) Tax_Id=85203 [Eucryphia milliganii]                                      | 0.07 |      | 0.090909091 | 9.090909091 |
| CaM-147* | ATP synthase subunit beta, chloroplastic | sp Q9MUT5 ATP synthase subunit beta, chloroplastic Tax_Id=41882 [Mesostigma viride]                           | 0.07 | 0.21 | 0.333333333 | 33.33333333 |
|          |                                          | ATP synthase subunit beta (Fragment) Tax_Id=227220 [Arctagrostis latifolia]                                   | 0.07 |      | 0.333333333 | 33.33333333 |
|          |                                          | ATP synthase subunit beta (Fragment) Tax_Id=519303 [Triodanis coloradoensis]                                  | 0.07 |      | 0.333333333 | 33.33333333 |
| CaM-157* | Putative GroEL protein chaperonin 60kDa  | RuBisCO large subunit-binding protein subunit beta, chloroplastic Tax_Id=3888 [Pisum sativum]                 | 0.33 | 1.01 | 0.326732673 | 32.67326733 |
|          |                                          | Beta chaperonin 60 Tax_Id=4109 [Solanum commersonii]                                                          | 0.19 |      | 0.188118812 | 18.81188119 |
|          |                                          | Putative GroEL protein:chaperonin, 60kDa (Fragment) Tax_Id=3755 [Prunus dulcis]                               | 0.49 |      | 0.485148515 | 48.51485149 |
| CaM-182* | Ferritin                                 | Ferritin Tax_Id=3694 [Populus trichocarpa]                                                                    | 0.23 | 0.23 | 1           | 100         |
| CaM-187* | Chlorophyll a/b binding protein          | Chlorophyll a/b binding protein Tax_Id=3827 [Cicer arietinum]                                                 | 1.41 | 5.01 | 0.281437126 | 28.14371257 |
|          |                                          | Putative uncharacterized protein Tax_Id=3847 [Glycine max]                                                    | 0.88 |      | 0.175648703 | 17.56487026 |
|          |                                          | Putative uncharacterized protein Tax_Id=29760 [Vitis vinifera]                                                | 0.86 |      | 0.171656687 | 17.16566866 |
|          |                                          | Light-harvesting complex II protein Lhcb1 Tax_Id=3694 [Populus trichocarpa]                                   | 0.66 |      | 0.131736527 | 13.17365269 |
|          |                                          | Chlorophyll a-b binding protein, chloroplast, putative, expressed Tax_Id=39947 [Oryza sativa subsp. japonica] | 1.2  |      | 0.239520958 | 23.95209581 |
| CaM-189* | ATP synthase subunit alpha               | ATP synthase subunit alpha Tax_Id=3827 [Cicer arietinum]                                                      | 1.32 | 8.63 | 0.152954809 | 15.29548088 |
|          |                                          | ATP synthase subunit alpha Tax_Id=3900 [Trifolium subterraneum]                                               | 0.91 |      | 0.105446118 | 10.54461182 |
|          |                                          | ATP synthase subunit alpha, chloroplastic Tax_Id=3885 [Phaseolus vulgaris]                                    | 0.79 |      | 0.091541136 | 9.154113557 |
|          |                                          | ATP synthase subunit alpha, chloroplastic Tax_Id=34305 [Lotus japonicus]                                      | 0.57 |      | 0.066048667 | 6.604866744 |

|          |                                    |                                                                                                                          |      |      |             |             |
|----------|------------------------------------|--------------------------------------------------------------------------------------------------------------------------|------|------|-------------|-------------|
|          |                                    | AtpA Tax_Id=180498 [ <i>Jatropha curcas</i> ]                                                                            | 0.68 |      | 0.078794902 | 7.879490151 |
|          |                                    | ATP synthase subunit alpha, chloroplastic Tax_Id=3847 [ <i>Glycine max</i> ]                                             | 0.57 |      | 0.066048667 | 6.604866744 |
|          |                                    | ATP synthase subunit alpha, chloroplastic Tax_Id=4081 [ <i>Solanum lycopersicum</i> ]                                    | 0.48 |      | 0.05561993  | 5.561993048 |
|          |                                    | ATP synthase subunit alpha (Fragment) Tax_Id=4733 [ <i>Typha latifolia</i> ]                                             | 0.48 |      | 0.05561993  | 5.561993048 |
|          |                                    | ATP synthase subunit alpha, chloroplastic Tax_Id=37657 [ <i>Silene latifolia</i> ]                                       | 0.38 |      | 0.044032445 | 4.403244496 |
|          |                                    | ATP synthase subunit alpha, chloroplastic Tax_Id=3942 [ <i>Oenothera biennis</i> ]                                       | 0.69 |      | 0.07995365  | 7.995365006 |
|          |                                    | ATP synthase subunit alpha, chloroplastic Tax_Id=2711 [ <i>Citrus sinensis</i> ]                                         | 0.38 |      | 0.044032445 | 4.403244496 |
|          |                                    | ATP synthase subunit alpha (Fragment) Tax_Id=32095 [ <i>Lonchitis hirsuta</i> ]                                          | 0.3  |      | 0.034762457 | 3.476245655 |
|          |                                    | ATP synthase subunit alpha, chloroplastic Tax_Id=48387 [ <i>Anthoceros formosae</i> ]                                    | 0.38 |      | 0.044032445 | 4.403244496 |
|          |                                    | ATP synthase subunit alpha, chloroplastic Tax_Id=3197 [ <i>Marchantia polymorpha</i> ]                                   | 0.39 |      | 0.045191194 | 4.519119351 |
|          |                                    | ATP synthase subunit alpha (Fragment) Tax_Id=3311 [ <i>Ginkgo biloba</i> ]                                               | 0.14 |      | 0.01622248  | 1.622247972 |
|          |                                    | ATP synthase subunit alpha (Fragment) Tax_Id=28472 [ <i>Epipactis helleborine</i> ]                                      | 0.08 |      | 0.009269988 | 0.926998841 |
|          |                                    | ATP synthase subunit alpha (Fragment) Tax_Id=396647 [ <i>Afrothismia hydra</i> ]                                         | 0.09 |      | 0.010428737 | 1.042873696 |
| CaM-191* | Ferritin                           | Ferritin Tax_Id=3847 [ <i>Glycine max</i> ]                                                                              | 0.28 |      | 0.571428571 | 57.14285714 |
|          |                                    | Whole genome shotgun sequence of line PN40024, scaffold_49.assembly12x (Fragment) Tax_Id=29760 [ <i>Vitis vinifera</i> ] | 0.12 | 0.49 | 0.244897959 | 24.48979592 |
|          |                                    | Putative uncharacterized protein Tax_Id=39946 [ <i>Oryza sativa</i> subsp. <i>indica</i> ]                               | 0.09 |      | 0.183673469 | 18.36734694 |
| CaM-196* | Oxygen-evolving enhancer protein 1 | Putative uncharacterized protein Tax_Id=3847 [ <i>Glycine max</i> ]                                                      | 0.36 |      | 0.330275229 | 33.02752294 |
|          |                                    | Chloroplast manganese stabilizing protein-II (Fragment) Tax_Id=4113 [ <i>Solanum tuberosum</i> ]                         | 0.25 | 1.09 | 0.229357798 | 22.93577982 |
|          |                                    | Putative uncharacterized protein Tax_Id=3847 [ <i>Glycine max</i> ]                                                      | 0.23 |      | 0.211009174 | 21.10091743 |
|          |                                    | Oxygen-evolving enhancer protein 1, chloroplastic Tax_Id=3888 [ <i>Pisum sativum</i> ]                                   | 0.11 |      | 0.100917431 | 10.09174312 |

|          |                                          |                                                                               |      |      |             |             |
|----------|------------------------------------------|-------------------------------------------------------------------------------|------|------|-------------|-------------|
|          |                                          | ATP synthase subunit alpha Tax_Id=3827 [Cicer arietinum]                      | 0.14 |      | 0.128440367 | 12.8440367  |
| CaM-205* | ATP synthase subunit beta                | ATP synthase subunit beta Tax_Id=128017 [Dimocarpus longan]                   | 0.13 | 0.13 | 1           | 100         |
| CaM-207* | ATP synthase subunit alpha               | ATP synthase subunit alpha Tax_Id=3827 [Cicer arietinum]                      | 0.38 | 0.95 | 0.4         | 40          |
|          |                                          | ATP synthase subunit alpha, chloroplastic Tax_Id=48387 [Anthoceros formosae]  | 0.14 |      | 0.147368421 | 14.73684211 |
|          |                                          | ATP synthase subunit alpha, chloroplastic Tax_Id=3197 [Marchantia polymorpha] | 0.14 |      | 0.147368421 | 14.73684211 |
|          |                                          | ATP synthase subunit alpha (Fragment) Tax_Id=4733 [Typha latifolia]           | 0.22 |      | 0.231578947 | 23.15789474 |
|          |                                          | ATP synthase subunit alpha (Fragment) Tax_Id=32095 [Lonchitis hirsuta]        | 0.07 |      | 0.073684211 | 7.368421053 |
| CaM-208* | Putative 60S acidic ribosomal protein P0 | Putative 60S acidic ribosomal protein P0 Tax_Id=57577 [Trifolium pratense]    | 0.11 | 0.11 | 1           | 100         |
| CaM-209* | Putative 60S acidic ribosomal protein P0 | Putative 60S acidic ribosomal protein P0 Tax_Id=57577 [Trifolium pratense]    | 0.11 | 0.11 | 1           | 100         |
| CaM-210* | Fructose-bisphosphate aldolase           | Fructose-bisphosphate aldolase Tax_Id=57577 [Trifolium pratense]              | 0.18 | 0.27 | 0.666666667 | 66.66666667 |
|          |                                          | Fructose bisphosphate aldolase Tax_Id=3879 [Medicago sativa]                  | 0.09 |      | 0.333333333 | 33.33333333 |
| CaM-218* | Glutamine synthetase                     | Glutamine synthetase Tax_Id=161934 [Beta vulgaris]                            | 0.08 | 0.08 | 1           | 100         |
| CaM-222* | ATP synthase subunit beta                | ATP synthase subunit beta Tax_Id=3827 [Cicer arietinum]                       | 0.15 | 0.15 | 1           | 100         |
| CaM-24*  | Putative uncharacterized protein         | Putative uncharacterized protein Tax_Id=3880 [Medicago truncatula]            | 0.8  | 1.01 | 0.792079208 | 79.20792079 |
|          |                                          | Putative uncharacterized protein Tax_Id=3880 [Medicago truncatula]            | 0.21 |      | 0.207920792 | 20.79207921 |
| CaM-240* | 40S ribosomal protein S12                | 40S ribosomal protein S12 Tax_Id=3847 [Glycine max]                           | 0.57 | 0.57 | 1           | 100         |
| CaM-254* | ATP synthase gamma chain                 | ATP synthase gamma chain Tax_Id=3880 [Medicago truncatula]                    | 0.3  | 1.33 | 0.22556391  | 22.55639098 |
|          |                                          | ATP synthase gamma chain Tax_Id=3847 [Glycine max]                            | 0.19 |      | 0.142857143 | 14.28571429 |
|          |                                          | ATP synthase gamma chain Tax_Id=3988 [Ricinus communis]                       | 0.19 |      | 0.142857143 | 14.28571429 |
|          |                                          | Putative uncharacterized protein Tax_Id=4577 [Zea mays]                       | 0.27 |      | 0.203007519 | 20.30075188 |
|          |                                          | Putative uncharacterized protein Tax_Id=3880 [Medicago truncatula]            | 0.38 |      | 0.285714286 | 28.57142857 |

|          |                                |                                                                              |      |      |             |             |
|----------|--------------------------------|------------------------------------------------------------------------------|------|------|-------------|-------------|
| CaM-269* | ATP synthase subunit alpha     | ATP synthase subunit alpha, chloroplastic Tax_Id=34305 [Lotus japonicus]     | 0.38 | 1.6  | 0.2375      | 23.75       |
|          |                                | ATP synthase subunit alpha Tax_Id=3827 [Cicer arietinum]                     | 0.38 |      | 0.2375      | 23.75       |
|          |                                | ATP synthase subunit beta Tax_Id=3827 [Cicer arietinum]                      | 0.23 |      | 0.14375     | 14.375      |
|          |                                | ATP synthase CF1 alpha subunit Tax_Id=157791 [Vigna radiata]                 | 0.38 |      | 0.2375      | 23.75       |
|          |                                | ATP synthase subunit beta (Fragment) Tax_Id=210340 [Bischofia javanica]      | 0.23 |      | 0.14375     | 14.375      |
| CaM-283* | 40S ribosomal protein S12      | 40S ribosomal protein S12 Tax_Id=3847 [Glycine max]                          | 0.97 | 0.97 | 1           | 100         |
| CaM-294* | Putative PSII-P protein        | Putative PSII-P protein (Fragment) Tax_Id=57577 [Trifolium pratense]         | 0.13 | 0.13 | 1           | 100         |
| CaM-295* | ATP synthase subunit alpha     | ATP synthase subunit alpha Tax_Id=3827 [Cicer arietinum]                     | 0.14 | 0.14 | 1           | 100         |
| CaM-301* | Proteasome subunit alpha type  | Proteasome subunit alpha type Tax_Id=3694 [Populus trichocarpa]              | 0.68 | 2.09 | 0.325358852 | 32.53588517 |
|          |                                | Proteasome subunit alpha type Tax_Id=3988 [Ricinus communis]                 | 0.47 |      | 0.224880383 | 22.48803828 |
|          |                                | Proteasome subunit alpha type (Fragment) Tax_Id=3750 [Malus domestica]       | 0.65 |      | 0.311004785 | 31.10047847 |
|          |                                | Proteasome subunit alpha type-6 Tax_Id=3847 [Glycine max]                    | 0.29 |      | 0.138755981 | 13.87559809 |
| CaM-308* | Fructose-bisphosphate aldolase | Fructose-bisphosphate aldolase 1, chloroplastic Tax_Id=3888 [Pisum sativum]  | 0.2  | 0.2  | 1           | 100         |
| CaM-311* | ATP synthase CF1 alpha subunit | ATP synthase CF1 alpha subunit Tax_Id=157791 [Vigna radiata]                 | 0.38 | 0.96 | 0.395833333 | 39.58333333 |
|          |                                | ATP synthase subunit alpha Tax_Id=3827 [Cicer arietinum]                     | 0.3  |      | 0.3125      | 31.25       |
|          |                                | ATP synthase subunit alpha Tax_Id=326026 [Geranium palmatum]                 | 0.14 |      | 0.145833333 | 14.58333333 |
|          |                                | ATP synthase subunit alpha, chloroplastic Tax_Id=55564 [Chara vulgaris]      | 0.14 |      | 0.145833333 | 14.58333333 |
| CaM-316* | ATP synthase subunit alpha     | ATP synthase subunit alpha Tax_Id=3827 [Cicer arietinum]                     | 0.38 | 0.96 | 0.395833333 | 39.58333333 |
|          |                                | ATP synthase subunit alpha, chloroplastic Tax_Id=2711 [Citrus sinensis]      | 0.22 |      | 0.229166667 | 22.91666667 |
|          |                                | ATP synthase subunit alpha, chloroplastic Tax_Id=48387 [Anthoceros formosae] | 0.22 |      | 0.229166667 | 22.91666667 |

|          |                                         |                                                                                   |      |      |             |             |
|----------|-----------------------------------------|-----------------------------------------------------------------------------------|------|------|-------------|-------------|
|          |                                         | ATP synthase subunit alpha Tax_Id=3369 [Cryptomeria japonica]                     | 0.14 |      | 0.145833333 | 14.58333333 |
| CaM-322* | Phosphoglycerate kinase precursors like | Phosphoglycerate kinase Tax_Id=4113 [Solanum tuberosum]                           | 0.15 | 0.7  | 0.214285714 | 21.42857143 |
|          |                                         | Phosphoglycerate kinase Tax_Id=3988 [Ricinus communis]                            | 0.16 |      | 0.228571429 | 22.85714286 |
|          |                                         | Putative uncharacterized protein Tax_Id=4577 [Zea mays]                           | 0.18 |      | 0.257142857 | 25.71428571 |
|          |                                         | Phosphoglycerate kinase Tax_Id=3880 [Medicago truncatula]                         | 0.14 |      | 0.2         | 20          |
|          |                                         | Phosphoglycerate kinase Tax_Id=29760 [Vitis vinifera]                             | 0.07 |      | 0.1         | 10          |
| CaM-323* | Putative uncharacterized protein        | Putative uncharacterized protein Tax_Id=3332 [Picea sitchensis]                   | 0.19 | 0.36 | 0.527777778 | 52.77777778 |
|          |                                         | Putative uncharacterized protein Tax_Id=3694 [Populus trichocarpa]                | 0.09 |      | 0.25        | 25          |
|          |                                         | Ribulose bisphosphate carboxylase activase B Tax_Id=4565 [Triticum aestivum]      | 0.08 |      | 0.222222222 | 22.22222222 |
| CaM-335* | ATP synthase subunit alpha              | ATP synthase subunit alpha Tax_Id=3827 [Cicer arietinum]                          | 0.07 | 0.07 | 1           | 100         |
| CaM-346* | Putative uncharacterized protein        | Putative uncharacterized protein Tax_Id=3694 [Populus trichocarpa]                | 0.09 | 0.64 | 0.140625    | 14.0625     |
|          |                                         | Transketolase (Fragment) Tax_Id=3827 [Cicer arietinum]                            | 0.5  |      | 0.78125     | 78.125      |
|          |                                         | Putative uncharacterized protein Sb06g004280 Tax_Id=4558 [Sorghum bicolor]        | 0.05 |      | 0.078125    | 7.8125      |
| CaM-376* | Ferredoxin-NADP reductase               | Ferredoxin--NADP reductase Tax_Id=39946 [Oryza sativa subsp. indica]              | 0.09 | 0.16 | 0.5625      | 56.25       |
|          |                                         | ATP synthase subunit alpha, chloroplastic Tax_Id=13443 [Coffea arabica]           | 0.07 |      | 0.4375      | 43.75       |
| CaM-382* | ATP synthase subunit alpha              | ATP synthase subunit alpha Tax_Id=3827 [Cicer arietinum]                          | 0.57 | 1.98 | 0.287878788 | 28.78787879 |
|          |                                         | ATP synthase subunit alpha (Fragment) Tax_Id=4733 [Typha latifolia]               | 0.39 |      | 0.196969697 | 19.6969697  |
|          |                                         | Fructose-bisphosphate aldolase, cytoplasmic isozyme 1 Tax_Id=3888 [Pisum sativum] | 0.45 |      | 0.227272727 | 22.72727273 |
|          |                                         | ATP synthase subunit alpha Tax_Id=3369 [Cryptomeria japonica]                     | 0.22 |      | 0.111111111 | 11.11111111 |
|          |                                         | Fructose-bisphosphate aldolase Tax_Id=3847 [Glycine max]                          | 0.21 |      | 0.106060606 | 10.60606061 |
|          |                                         | ATP synthase subunit alpha (Fragment) Tax_Id=32095                                | 0.14 |      | 0.070707071 | 7.070707071 |

|          |                                   |                                                                                                           |      |      |             |             |
|----------|-----------------------------------|-----------------------------------------------------------------------------------------------------------|------|------|-------------|-------------|
|          |                                   | [Lonchitis hirsuta]                                                                                       |      |      |             |             |
| CaM-386* | ATP synthase subunit alpha        | ATP synthase subunit alpha Tax_Id=3827 [Cicer arietinum]                                                  | 0.68 | 2.17 | 0.313364055 | 31.33640553 |
|          |                                   | ATP synthase subunit alpha (Fragment) Tax_Id=4733 [Typha latifolia]                                       | 0.39 |      | 0.179723502 | 17.97235023 |
|          |                                   | ATP synthase subunit alpha Tax_Id=3369 [Cryptomeria japonica]                                             | 0.3  |      | 0.138248848 | 13.82488479 |
|          |                                   | ATP synthase subunit alpha, chloroplastic Tax_Id=48387 [Anthoceros formosae]                              | 0.22 |      | 0.101382488 | 10.13824885 |
|          |                                   | ATP synthase subunit alpha, chloroplastic Tax_Id=3197 [Marchantia polymorpha]                             | 0.22 |      | 0.101382488 | 10.13824885 |
|          |                                   | ATP synthase subunit alpha (Fragment) Tax_Id=32095 [Lonchitis hirsuta]                                    | 0.14 |      | 0.064516129 | 6.451612903 |
|          |                                   | ATP synthase subunit alpha, chloroplastic Tax_Id=2711 [Citrus sinensis]                                   | 0.22 |      | 0.101382488 | 10.13824885 |
| CaM-39*  | Putative 60S ribosomal protein L1 | Putative uncharacterized protein Tax_Id=3880 [Medicago truncatula]                                        | 0.08 | 0.08 | 1           | 100         |
| CaM-394* | ATP synthase subunit alpha        | Ribulose-1,5-bisphosphate carboxylase/oxygenase activase (Fragment) Tax_Id=74825 [Pachysandra terminalis] | 0.23 | 0.93 | 0.247311828 | 24.7311828  |
|          |                                   | ATP synthase subunit alpha Tax_Id=3827 [Cicer arietinum]                                                  | 0.14 |      | 0.150537634 | 15.05376344 |
|          |                                   | ATP synthase subunit alpha (Fragment) Tax_Id=4733 [Typha latifolia]                                       | 0.14 |      | 0.150537634 | 15.05376344 |
|          |                                   | Ribulose-1,5-bisphosphate carboxylase activase (Fragment) Tax_Id=4565 [Triticum aestivum]                 | 0.17 |      | 0.182795699 | 18.27956989 |
|          |                                   | Putative uncharacterized protein Tax_Id=3694 [Populus trichocarpa]                                        | 0.09 |      | 0.096774194 | 9.677419355 |
|          |                                   | Putative uncharacterized protein Tax_Id=3332 [Picea sitchensis]                                           | 0.09 |      | 0.096774194 | 9.677419355 |
|          |                                   | ATP synthase subunit alpha (Fragment) Tax_Id=32095 [Lonchitis hirsuta]                                    | 0.07 |      | 0.075268817 | 7.52688172  |
| CaM-396* | ATP synthase subunit alpha        | ATP synthase subunit alpha Tax_Id=3827 [Cicer arietinum]                                                  | 0.57 | 2.07 | 0.275362319 | 27.53623188 |
|          |                                   | ATP synthase subunit alpha (Fragment) Tax_Id=4733 [Typha latifolia]                                       | 0.48 |      | 0.231884058 | 23.1884058  |
|          |                                   | ATP synthase subunit alpha, chloroplastic Tax_Id=48387 [Anthoceros formosae]                              | 0.22 |      | 0.106280193 | 10.62801932 |
|          |                                   | ATP synthase subunit alpha, chloroplastic Tax_Id=3197                                                     | 0.22 |      | 0.106280193 | 10.62801932 |

|          |                                                             |                                                                                                             |      |      |             |             |
|----------|-------------------------------------------------------------|-------------------------------------------------------------------------------------------------------------|------|------|-------------|-------------|
|          |                                                             | [Marchantia polymorpha                                                                                      |      |      |             |             |
|          |                                                             | ATP synthase subunit alpha Tax_Id=3369 [Cryptomeria japonica]                                               | 0.22 |      | 0.106280193 | 10.62801932 |
|          |                                                             | ATP synthase subunit alpha (Fragment) Tax_Id=49509 [Pilularia globulifera]                                  | 0.22 |      | 0.106280193 | 10.62801932 |
|          |                                                             | ATP synthase subunit alpha, chloroplastic Tax_Id=3144 [Chlorokybus atmophyticus]                            | 0.14 |      | 0.06763285  | 6.763285024 |
| CaM-416* | Succinate dehydrogenase flavoprotein subunit, mitochondrial | Unknown protein 18 (Fragment) Tax_Id=3357 [Pseudotsuga menziesii]                                           | 4.22 | 4.32 | 0.976851852 | 97.68518519 |
|          |                                                             | Putative uncharacterized protein Tax_Id=4577 [Zea mays]                                                     | 0.05 |      | 0.011574074 | 1.157407407 |
|          |                                                             | Predicted protein Tax_Id=564608 [Micromonas pusilla CCMP1545]                                               | 0.05 |      | 0.011574074 | 1.157407407 |
| CaM-428* | Beta-1,3-glucanase                                          | Beta-1,3-glucanase Tax_Id=89151 [Musa paradisiaca]                                                          | 0.1  | 0.1  | 1           | 100         |
| CaM-43*  | Ribulose biphosphate carboxylase large chain                | Ribulose biphosphate carboxylase large chain Tax_Id=3827 [Cicer arietinum]                                  | 0.23 | 3.4  | 0.067647059 | 6.764705882 |
|          |                                                             | Ribulose biphosphate carboxylase large chain (Fragment) Tax_Id=284232 [Triodanis perfoliata]                | 0.24 |      | 0.070588235 | 7.058823529 |
|          |                                                             | Ribulose biphosphate carboxylase large chain (Fragment) Tax_Id=321576 [Delonix brachycarpa]                 | 0.23 |      | 0.067647059 | 6.764705882 |
|          |                                                             | Ribulose biphosphate carboxylase large chain (Fragment) Tax_Id=93819 [Orthilia secunda]                     | 0.23 |      | 0.067647059 | 6.764705882 |
|          |                                                             | Ribulose biphosphate carboxylase large chain (Fragment) Tax_Id=28475 [Lasia spinosa]                        | 0.25 |      | 0.073529412 | 7.352941176 |
|          |                                                             | Ribulose biphosphate carboxylase large chain (Fragment) Tax_Id=74618 [Levenhookia leptantha]                | 0.23 |      | 0.067647059 | 6.764705882 |
|          |                                                             | Ribulose biphosphate carboxylase large chain (Fragment) Tax_Id=37395 [Reboulia hemisphaerica]               | 0.26 |      | 0.076470588 | 7.647058824 |
|          |                                                             | Ribulose biphosphate carboxylase large chain (Fragment) Tax_Id=280253 [Plagiochila arbuscula]               | 0.25 |      | 0.073529412 | 7.352941176 |
|          |                                                             | Ribulose biphosphate carboxylase large chain (Fragment) Tax_Id=162704 [Caesalpinia calycina]                | 0.25 |      | 0.073529412 | 7.352941176 |
|          |                                                             | Ribulose biphosphate carboxylase large chain Tax_Id=84014 [Comarostaphylis arbutoides]                      | 0.15 |      | 0.044117647 | 4.411764706 |
|          |                                                             | Ribulose-1,5-biphosphate carboxylase/oxygenase large subunit (Fragment) Tax_Id=426038 [Desmidium aptogonum] | 0.24 |      | 0.070588235 | 7.058823529 |
|          |                                                             | Ribulose biphosphate carboxylase large chain (Fragment)                                                     | 0.15 |      | 0.044117647 | 4.411764706 |

|          |                                            |                                                                                                                   |      |      |             |             |
|----------|--------------------------------------------|-------------------------------------------------------------------------------------------------------------------|------|------|-------------|-------------|
|          |                                            | Tax_Id=43553 [Pinckneya pubens]                                                                                   |      |      |             |             |
|          |                                            | Ribulose biphosphate carboxylase large chain (Fragment)<br>Tax_Id=124814 [Salacia undulata]                       | 0.23 |      | 0.067647059 | 6.764705882 |
|          |                                            | Ribulose-1,5-biphosphate carboxylase/oxygenase large subunit (Fragment) Tax_Id=239430 [Campanulastrum americanum] | 0.16 |      | 0.047058824 | 4.705882353 |
|          |                                            | Ribulose biphosphate carboxylase large chain (Fragment)<br>Tax_Id=125047 [Pentaptylax euryoides]                  | 0.15 |      | 0.044117647 | 4.411764706 |
|          |                                            | Ribulose biphosphate carboxylase large chain (Fragment)<br>Tax_Id=312916 [Ammannia latifolia]                     | 0.15 |      | 0.044117647 | 4.411764706 |
| CaM-435* | Carbonic anhydrase                         | Carbonic anhydrase Tax_Id=3916 [Phaseolus aureus]                                                                 | 0.11 | 0.22 | 0.5         | 50          |
|          |                                            | Carbonic anhydrase Tax_Id=3635 [Gossypium hirsutum]                                                               | 0.11 |      | 0.5         | 50          |
| CaM-436* | Putative quinone oxidoreductase            | Putative quinone oxidoreductase Tax_Id=3827 [Cicer arietinum]                                                     | 0.63 | 0.63 | 1           | 100         |
| CaM-443* | Predicted protein                          | Predicted protein Tax_Id=3694 [Populus trichocarpa]                                                               | 0.14 | 0.14 | 1           | 100         |
| CaM-445* | Putative uncharacterized                   | Putative uncharacterized protein Tax_Id=3847 [Glycine max]                                                        | 0.62 | 1.17 | 0.52991453  | 52.99145299 |
|          |                                            | Putative uncharacterized protein (Fragment) Tax_Id=3880 [Medicago truncatula]                                     | 0.55 |      | 0.47008547  | 47.00854701 |
| CaM-453* | Fructose-bisphosphate aldolase             | ATP synthase subunit alpha Tax_Id=3827 [Cicer arietinum]                                                          | 0.3  | 0.81 | 0.37037037  | 37.03703704 |
|          |                                            | ATP synthase subunit alpha (Fragment) Tax_Id=4733 [Typha latifolia]                                               | 0.22 |      | 0.271604938 | 27.16049383 |
|          |                                            | Fructose-bisphosphate aldolase, cytoplasmic isozyme<br>Tax_Id=3827 [Cicer arietinum]                              | 0.1  |      | 0.12345679  | 12.34567901 |
|          |                                            | ATP synthase subunit alpha (Fragment) Tax_Id=32095 [Lonchitis hirsuta]                                            | 0.07 |      | 0.086419753 | 8.641975309 |
|          |                                            | Fructose-bisphosphate aldolase Tax_Id=3371 [Metasequoia glyptostroboides]                                         | 0.12 |      | 0.148148148 | 14.81481481 |
| CaM-461* | Glyceraldehyde-3-phosphate dehydrogenase   | Putative uncharacterized protein Tax_Id=3880 [Medicago truncatula]                                                | 0.61 | 1.29 | 0.472868217 | 47.28682171 |
|          |                                            | Glyceraldehyde 3-phosphate dehydrogenase (Fragment)<br>Tax_Id=386278 [Scopellaria marginata]                      | 0.29 |      | 0.224806202 | 22.48062016 |
|          |                                            | Putative uncharacterized protein Tax_Id=4577 [Zea mays]                                                           | 0.09 |      | 0.069767442 | 6.976744186 |
|          |                                            | Glyceraldehyde 3-phosphate dehydrogenase (Fragment)<br>Tax_Id=386199 [Mukia maderaspatana]                        | 0.3  |      | 0.23255814  | 23.25581395 |
| CaM-462* | Glyceraldehyde-3-phosphate dehydrogenase A | Glyceraldehyde-3-phosphate dehydrogenase A, chloroplastic<br>Tax_Id=3888 [Pisum sativum]                          | 0.28 | 0.28 | 1           | 100         |



|          |                                                      |                                                                                                                 |      |      |             |             |
|----------|------------------------------------------------------|-----------------------------------------------------------------------------------------------------------------|------|------|-------------|-------------|
| CaM-483* | Mitochondrial outer membrane protein porin of 34 kDa | Whole genome shotgun sequence of line PN40024, scaffold_25.assembly12x (Fragment) Tax_Id=29760 [Vitis vinifera] | 0.38 | 0.96 | 0.395833333 | 39.58333333 |
|          |                                                      | Luminal-binding protein Tax_Id=3562 [Spinacia oleracea]                                                         | 0.22 |      | 0.229166667 | 22.91666667 |
|          |                                                      | Outer plastidial membrane protein porin Tax_Id=3888 [Pisum sativum]                                             | 0.13 |      | 0.135416667 | 13.54166667 |
|          |                                                      | Porin Tax_Id=3544 [Mesembryanthemum crystallinum]                                                               | 0.13 |      | 0.135416667 | 13.54166667 |
|          |                                                      | Luminal binding protein, BiP Tax_Id=3190 [Scherffelia dubia]                                                    | 0.1  |      | 0.104166667 | 10.41666667 |
| CaM-485* | Carbonic anhydrase                                   | Carbonic anhydrase Tax_Id=3885 [Phaseolus vulgaris]                                                             | 0.65 | 0.98 | 0.663265306 | 66.32653061 |
|          |                                                      | Carbonic anhydrase Tax_Id=3635 [Gossypium hirsutum]                                                             | 0.22 |      | 0.224489796 | 22.44897959 |
|          |                                                      | Carbonic anhydrase Tax_Id=74825 [Pachysandra terminalis]                                                        | 0.11 |      | 0.112244898 | 11.2244898  |
| CaM-487* | Guanine nucleotide-binding protein subunit beta-like | Putative uncharacterized protein Tax_Id=3880 [Medicago truncatula]                                              | 1.19 | 2.9  | 0.410344828 | 41.03448276 |
|          |                                                      | Putative uncharacterized protein Tax_Id=3847 [Glycine max]                                                      | 0.81 |      | 0.279310345 | 27.93103448 |
|          |                                                      | Guanine nucleotide-binding protein subunit beta-like protein Tax_Id=3879 [Medicago sativa]                      | 0.64 |      | 0.220689655 | 22.06896552 |
|          |                                                      | Putative uncharacterized protein Tax_Id=3332 [Picea sitchensis]                                                 | 0.19 |      | 0.065517241 | 6.551724138 |
|          |                                                      | Whole genome shotgun sequence of line PN40024, scaffold_4.assembly12x (Fragment) Tax_Id=29760 [Vitis vinifera]  | 0.07 |      | 0.024137931 | 2.413793103 |
| CaM-71*  | light-harvesting complex II protein Lhcb3            | Putative uncharacterized protein Tax_Id=3695 [Populus trichocarpa x Populus deltoides]                          | 0.16 | 0.41 | 0.390243902 | 39.02439024 |
|          |                                                      | Putative uncharacterized protein Tax_Id=3847 [Glycine max]                                                      | 0.13 |      | 0.317073171 | 31.70731707 |
|          |                                                      | tr Q0PWS5 Chloroplast pigment-binding protein CP26 Tax_Id=4097 [Nicotiana tabacum]                              | 0.12 |      | 0.292682927 | 29.26829268 |
| CaM-73*  | Actin (Fragment)                                     | Actin (Fragment) Tax_Id=69334 [Chara contraria]                                                                 | 0.16 | 0.26 | 0.615384615 | 61.53846154 |
|          |                                                      | Actin (Fragment) Tax_Id=38836 [Pterosperma cristatum]                                                           | 0.1  |      | 0.384615385 | 38.46153846 |
| CaM-75*  | Chlorophyll a/b binding protein                      | Chlorophyll a/b binding protein Tax_Id=3827 [Cicer arietinum]                                                   | 1.13 | 3.78 | 0.298941799 | 29.89417989 |
|          |                                                      | Chlorophyll a-b binding protein AB80, chloroplastic Tax_Id=3888 [Pisum sativum]                                 | 0.86 |      | 0.227513228 | 22.75132275 |
|          |                                                      | Light-harvesting chlorophyll a/b-binding protein                                                                | 0.46 |      | 0.121693122 | 12.16931217 |

|         |                                              |                                                                                                                               |      |      |                         |
|---------|----------------------------------------------|-------------------------------------------------------------------------------------------------------------------------------|------|------|-------------------------|
|         |                                              | Tax_Id=3760 [ <i>Prunus persica</i> ]                                                                                         |      |      |                         |
|         |                                              | Putative uncharacterized protein Tax_Id=29760 [ <i>Vitis vinifera</i> ]                                                       | 0.64 |      | 0.169312169 16.93121693 |
|         |                                              | Chlorophyll a-b binding protein, chloroplast, putative, expressed Tax_Id=39947 [ <i>Oryza sativa</i> subsp. <i>japonica</i> ] | 0.69 |      | 0.182539683 18.25396825 |
| CaM-78* | Chlorophyll a/b binding protein              | Chlorophyll a/b binding protein Tax_Id=3827 [ <i>Cicer arietinum</i> ]                                                        | 1.41 | 2.92 | 0.482876712 48.28767123 |
|         |                                              | Putative uncharacterized protein Tax_Id=29760 [ <i>Vitis vinifera</i> ]                                                       | 0.86 |      | 0.294520548 29.45205479 |
|         |                                              | Putative chloroplast chlorophyll a/b-binding protein Tax_Id=139927 [ <i>Carya cathayensis</i> ]                               | 0.65 |      | 0.22260274 22.26027397  |
| CaM-9*  | Ribulose biphosphate carboxylase large chain | Ribulose biphosphate carboxylase large chain (Fragment) Tax_Id=223100 [ <i>Orobanche coerulescens</i> ]                       | 0.16 | 0.51 | 0.31372549 31.37254902  |
|         |                                              | Putative uncharacterized protein Tax_Id=3880 [ <i>Medicago truncatula</i> ]                                                   | 0.35 |      | 0.68627451 68.62745098  |
| CaM-94* | Chaperonin 60 alpha subunit                  | Putative uncharacterized protein Tax_Id=3880 [ <i>Medicago truncatula</i> ]                                                   | 0.9  | 6.84 | 0.131578947 13.15789474 |
|         |                                              | tr Q2PEP1 Putative rubisco subunit binding-protein alpha subunit Tax_Id=57577 [ <i>Trifolium pratense</i> ]                   | 0.79 |      | 0.115497076 11.5497076  |
|         |                                              | RuBisCO large subunit-binding protein subunit alpha, chloroplastic Tax_Id=3888 [ <i>Pisum sativum</i> ]                       | 0.59 |      | 0.08625731 8.625730994  |
|         |                                              | Chaperonin 60 alpha subunit Tax_Id=28957 [ <i>Canavalia lineata</i> ]                                                         | 0.7  |      | 0.102339181 10.23391813 |
|         |                                              | Predicted protein Tax_Id=3694 [ <i>Populus trichocarpa</i> ]                                                                  | 0.59 |      | 0.08625731 8.625730994  |
|         |                                              | Predicted protein Tax_Id=3694 [ <i>Populus trichocarpa</i> ]                                                                  | 0.5  |      | 0.073099415 7.30994152  |
|         |                                              | Putative rubisco subunit binding-protein alpha subunit Tax_Id=3702 [ <i>Arabidopsis thaliana</i> ]                            | 0.42 |      | 0.061403509 6.140350877 |
|         |                                              | RuBisCO large subunit-binding protein subunit alpha, chloroplastic Tax_Id=3708 [ <i>Brassica napus</i> ]                      | 0.55 |      | 0.080409357 8.040935673 |
|         |                                              | Putative uncharacterized protein Tax_Id=39946 [ <i>Oryza sativa</i> subsp. <i>indica</i> ]                                    | 0.51 |      | 0.074561404 7.456140351 |
|         |                                              | RuBisCO large subunit-binding protein subunit alpha, chloroplastic Tax_Id=4565 [ <i>Triticum aestivum</i> ]                   | 0.29 |      | 0.042397661 4.239766082 |
|         |                                              | Putative uncharacterized protein Tax_Id=39946 [ <i>Oryza sativa</i> subsp. <i>indica</i> ]                                    | 0.19 |      | 0.027777778 2.777777778 |
|         |                                              | Chaperonin-60 alpha subunit Tax_Id=82927 [ <i>Avicennia marina</i> ]                                                          | 0.5  |      | 0.073099415 7.30994152  |
|         |                                              | Predicted protein Tax_Id=564608 [ <i>Micromonas pusilla</i> ]                                                                 | 0.12 |      | 0.01754386 1.754385965  |

|         |                |                                                                                            |      |      |                         |
|---------|----------------|--------------------------------------------------------------------------------------------|------|------|-------------------------|
|         |                | CCMP1545]                                                                                  |      |      |                         |
|         |                | Plastid 60 kDa chaperonin alpha subunit (Fragment)<br>Tax_Id=3111 [Prototheca wickerhamii] | 0.19 |      | 0.027777778 2.777777778 |
| CaM-99* | Chaperone DnaK | Chaperone DnaK Tax_Id=3880 [Medicago truncatula]                                           | 0.33 | 0.76 | 0.434210526 43.42105263 |
|         |                | Chloroplast heat shock protein 70-2 Tax_Id=35883<br>[Ipomoea nil]                          | 0.16 |      | 0.210526316 21.05263158 |
|         |                | Chloroplast heat shock protein 70-1 Tax_Id=35883<br>[Ipomoea nil]                          | 0.16 |      | 0.210526316 21.05263158 |
|         |                | Os03g0859600 protein (Fragment) Tax_Id=39947 [Oryza<br>sativa subsp. japonica]             | 0.11 |      | 0.144736842 14.47368421 |

**Supplementary Table S6.** *In silico* analyses of SUN domain proteins from different organisms.

| Gene/ Accession No.                     | Organism             | Sequence length (aa) | Position of SUN domain | No. of TMD                                        | No. of CC domain and position                      | Position of signal peptide |
|-----------------------------------------|----------------------|----------------------|------------------------|---------------------------------------------------|----------------------------------------------------|----------------------------|
| CaSUN1                                  | <i>C. arietinum</i>  | 602                  | 215 -337               | N-terminus outside 3 strong transmembrane helices | 1<br>(474 L-487 Q)                                 | 52 - 53                    |
| SLP1 (YOR154W)                          | <i>S. cerevisiae</i> | 587                  | 204 -330               | N-terminus inside 2 strong transmembrane helices  | 1<br>(362 N-375 E)                                 | 21 - 22                    |
| MPS3 (YJL019W)                          | <i>S. cerevisiae</i> | 682                  | 474 -613               | N-terminus inside 1 strong transmembrane helices  | 3<br>(245 N-260 I) (366 I-380 I )<br>(386 N-401Q)  | Non-secretory protein      |
| SAD1 ( SPBC12D12)                       | <i>S. pombe</i>      | 514                  | 358 -486               | N-terminus outside 2 strong transmembrane helices | 2<br>(82 R-95 N) (263 L- 282 K)                    | Non-secretory protein      |
| Sad1-UNC-like protein (SPBC3E7.09)      | <i>S. pombe</i>      | 659                  | 208 -333               | N-terminus outside 2 strong transmembrane helices | 3<br>(336 I-349 Q ) (458 Y-473 K)<br>(525 A-538 E) | 25 - 26                    |
| AtSUN3 (AT1G22882 )                     | <i>A. thaliana</i>   | 660                  | 278 -400               | N-terminus inside 3 strong transmembrane helices  | 2<br>(100 N-113 E) (574 R-598 V)                   | 47 - 48                    |
| AtSUN1 (AT5G04990)                      | <i>A. thaliana</i>   | 471                  | 315 -450               | N-terminus inside 1 strong transmembrane helices  | 2<br>(181 K-197 K) (203 S-217 K)                   | Non-secretory protein      |
| Hypothetical protein (Pp1s191_3V6 )     | <i>P. patens</i>     | 844                  | 472 -595               | N-terminus outside 3 strong transmembrane helices | 2<br>(35 Q-48 K ) (713 L-726 N)                    | Non-secretory protein      |
| Hypothetical protein (Pp1s31_189V6 )    | <i>P. patens</i>     | 489                  | 348 -483               | N-terminus outside 2 strong transmembrane helices | 0                                                  | Non-secretory protein      |
| Hypothetical protein (gi115435856)      | <i>O. sativa</i>     | 455                  | 306 -443               | N-terminus outside 3 strong transmembrane helices | 1<br>(182 L-206 D)                                 | Non-secretory protein      |
| Mmembrane protein CH1-like (gi20804770) | <i>O. sativa</i>     | 624                  | 245 -367               | N-terminus inside 3 strong transmembrane helices  | 2<br>(501 A-516 S) (550 S-565 R)                   | Non-secretory protein      |
| gi 226509595                            | <i>Z. mays</i>       | 462                  | 315 -453               | N-terminus inside 1 strong transmembrane helices  | 2<br>(172 L-196 K) (206 E-219 L)                   | Non-secretory protein      |

|                   |                        |      |          |                                                   |                                                                  |                       |
|-------------------|------------------------|------|----------|---------------------------------------------------|------------------------------------------------------------------|-----------------------|
| gi226504550       | <i>Z. mays</i>         | 589  | 197 -320 | N-terminus outside 4 strong transmembrane helices | 1<br>(511 E-524 E)                                               | Non-secretory protein |
| Glyma15g35240     | <i>G. max</i>          | 446  | 301 -434 | N-terminus outside 1 strong transmembrane helices | 2<br>(161 K-177 K) (185 L-209 E)                                 | Non-secretory protein |
| Gm09g00440        | <i>G. max</i>          | 541  | 155 -277 | N-terminus outside 4 strong transmembrane helices | 3<br>(413 I-426 Q) (461 E-474 N)                                 | 38 - 39               |
| UNC-84            | <i>C. elegans</i>      | 1111 | 973-1107 | N-terminus inside 9 strong transmembrane helices  | 0                                                                | Non-secretory protein |
| gi:17508615       | <i>C. elegans</i>      | 802  | 147-271  | N-terminus inside 2 strong transmembrane helices  | 1<br>(546 K-559 Q)                                               | 20 - 21               |
| gi221510664<br>   | <i>D. melanogaster</i> | 1252 | 244 -367 | N-terminus outside 4 strong transmembrane helices | 3<br>(189 E-207 K) (755 I-770 L)<br>(775 L-797 T)                | 38 - 39               |
| DrossoFBpp0292403 | <i>D. melanogaster</i> | 563  | 426 -559 | N-terminus outside 1 strong transmembrane helices | 3<br>(183 S-200 I) (246 L-260 S)<br>(310 L-323 N )               | Non-secretory protein |
| gi29337242        | <i>H. sapiens</i>      | 717  | 582 -714 | N-terminus inside 3 strong transmembrane helices  | 2<br>(279 R-293 E) (349 R-368 Q)                                 | Non-secretory protein |
| gi170784831       | <i>H. sapiens</i>      | 1210 | 286 -408 | N-terminus inside 4 strong transmembrane helices  | 3<br>(235 D-248 K) (872 M-888 S)<br>( 892 L-910 F) (949 V-964 S) | 29 - 30               |

**Supplementary Table S7.** Genomic organization of SUN protein gene family.

| Gene ID/Accession number | Organism                 | No of introns | Size and position of introns                                                                                                            |
|--------------------------|--------------------------|---------------|-----------------------------------------------------------------------------------------------------------------------------------------|
| CaSUN1                   | <i>C. arietinum</i>      | 4             | 1. 143 (81-222)<br>2. 1857(424-2279)<br>3. 107(3602-3707)<br>4. 3346(3794-7138)                                                         |
| SLP1                     | <i>S. cerevisiae</i>     | 0             | -                                                                                                                                       |
| MPS3                     | <i>S. cerevisiae</i>     | 0             | -                                                                                                                                       |
| SAD1                     | <i>S. pombe</i>          | 0             | -                                                                                                                                       |
| SUNLIKE                  | <i>S. pombe</i>          | 0             | -                                                                                                                                       |
| AT1G22882                | <i>A. thaliana</i>       | 2             | 1. 181(170-349)<br>2. 89(536-627)                                                                                                       |
| AtSUN1                   | <i>A. thaliana</i>       | 1             | 1. 658(1284-1940)                                                                                                                       |
| Pp1s191_3V6              | <i>P. patens</i>         | 0             | -                                                                                                                                       |
| Pp1s31_189V6             | <i>P. patens</i>         | 0             | -                                                                                                                                       |
| Selaginella_441228       | <i>S. moellendorffii</i> | 3             | 1. 70(314-382)<br>2. 70(1397-1465)<br>3. 68(1513-1579)                                                                                  |
| Selaginella_89851        | <i>S. moellendorffii</i> | 1             | 1. 124(598-720)                                                                                                                         |
| Osgil15435856            | <i>O. sativa</i>         | 1             | 1. 1081(1167-2246)                                                                                                                      |
| Osgi20804770             | <i>O. sativa</i>         | 3             | 1. 338(633-969)<br>2. 86(2316-2400)<br>3. 259(2487-2744)                                                                                |
| Zmgi226509595            | <i>Z. maize</i>          | 2             | 1. 537(285-820)<br>2. 3409(1953-5360)                                                                                                   |
| Zmgi226504550            | <i>Z. maize</i>          | 3             | 1. 101(230-329)<br>2. 76(1535-1609)<br>3. 95(1696-1789)                                                                                 |
| Glyma15g35240            | <i>G. max</i>            | 2             | 1. 49(237-284)<br>2. 2641(1084-3723)                                                                                                    |
| Gm09g00440               | <i>G. max</i>            | 3             | 1. 87(256-341)<br>2. 111(1499-1608)<br>3. 1141(1695-2834)                                                                               |
| DmFBpp0288499            | <i>D. melanogaster</i>   | 4             | 1. 82(135-215)<br>2. 69(428-495)<br>3. 842(2436-3276)<br>4. 64(3977-4039)                                                               |
| DmFBpp0292403            | <i>D. melanogaster</i>   | 2             | 1. 58(1367-1423)<br>64(1537-1599)                                                                                                       |
| UNC-84                   | <i>C. elegans</i>        | 9             | 1. 495(178-691)<br>2. 53(973-1024)<br>3. 60(1854-1912)<br>4. 59(2356-2413)<br>5. 481(2678-3157)<br>6. 52(3314-3364)<br>7. 76(3823-3897) |

|               |                   |    |                                                                                                                                                                                                                                                                                                                                                                           |
|---------------|-------------------|----|---------------------------------------------------------------------------------------------------------------------------------------------------------------------------------------------------------------------------------------------------------------------------------------------------------------------------------------------------------------------------|
|               |                   |    | 8. 53(4219-4270)<br>9. 61(4544-4603)                                                                                                                                                                                                                                                                                                                                      |
| CeR12E2       | <i>C. elegans</i> | 8  | 1. 114(30-142)<br>2. 53(236-287)<br>3. 46(368-412)<br>4. 53(499-550)<br>5. 53(1255-1306)<br>6. 58(1853-1909)<br>7. 47(2161-2206)<br>8. 53(2344-2395)                                                                                                                                                                                                                      |
| Hsgi29337242  | <i>H. sapiens</i> | 16 | 1. 1134(123-1255)<br>2. 175(1420-1593)<br>3. 578(1732-2308)<br>4. 366(2405-2769)<br>5. 983(2864-3845)<br>6. 2902(3917-6817)<br>7. 3129(6946-10073)<br>8. 730(10329-11057)<br>9. 444(11136-11578)<br>10. 575(11623-12196)<br>11. 324(12363-12685)<br>12. 296(12908-13202)<br>13. 354(13288-13640)<br>14. 119(13757-13874)<br>15. 322(14043-14363)<br>16. 1793(14457-16248) |
| Hsgi224514980 | <i>H. sapiens</i> | 21 | 1. 18015(63-18076)<br>2. 4243(18192-22433)<br>3. 1257(22589-23844)<br>4. 227(23983-24208)<br>5. 11225(24360-35583)<br>6. 905(35708-36611)<br>7. 492(36737-37227)<br>8. 3161(37296-40455)<br>9. 1520(40564-                                                                                                                                                                |

|  |  |  |                       |
|--|--|--|-----------------------|
|  |  |  | 42082)                |
|  |  |  | 10. 2141(42189-44328) |
|  |  |  | 11. 479(44386-44863)  |
|  |  |  | 12. 813(44955-45766)  |
|  |  |  | 13. 5751(45833-51582) |
|  |  |  | 14. 772(51652-52422)  |
|  |  |  | 15. 2812(52514-55324) |
|  |  |  | 16. 1058(56492-57548) |
|  |  |  | 17. 8993(57637-66628) |
|  |  |  | 18. 1896(66734-68628) |
|  |  |  | 19. 478(68784-69260)  |
|  |  |  | 20. 596(69353-75311)  |
|  |  |  | 21. 1014(75368-76380) |



**Supplementary Table S8.** Detail of the mass spectra of membrane proteins identified with single peptide.

| Spot No. | Identification                                        | Observed | Mr(expt)  | Mr(calc)  | Delta    | Miss | Score | Expect   | Rank | Peptide              | Instrument | Taxonomy      | Database  | Peptide mass tolerance | Fragment mass tolerance |
|----------|-------------------------------------------------------|----------|-----------|-----------|----------|------|-------|----------|------|----------------------|------------|---------------|-----------|------------------------|-------------------------|
| CaM-73   | Actin (Fragment)                                      | 895.983  | 1789.95   | 1789.88   | 0.0666   | 0    | 63    | 0.0017   | 1    | K.SYELPDGQVITIGNER.F | iTRAP      | Viridiplantae | Ludwig NR | 1.2 Da                 | 0.6 Da                  |
| CaM-182  | Ferritin                                              | 546.5969 | 1091.1792 | 1091.5975 | -0.4183  | 0    | 50    | 0.027    | 1    | K.IAEYVTQLR.M        | iTRAP      | Viridiplantae | Ludwig NR | 1.2 Da                 | 0.6 Da                  |
| CaM-214  | Glutamate-ammonia ligase (EC 6.3.1.2) delta precursor | 488.75   | 975.49    | 975.50    | -0.01    | 0    | 68    | 7.4E-05  | 1    | R.AAEIFSNPK.V        | Qstar      | Viridiplantae | MSDB      | 100 ppm                | 0.4 Da                  |
| CaM-216  | Glutamate-ammonia ligase (EC 6.3.1.2) delta precursor | 488.76   | 975.50    | 975.50    | -0.00    | 0    | 39    | 0.05     | 1    | R.AAEIFSNPK.V        | Qstar      | Viridiplantae | MSDB      | 100 ppm                | 0.4 Da                  |
| CaM-218  | Glutamine synthetase                                  | 488.5679 | 975.1212  | 975.5025  | 975.5025 | 0    | 50    | 0.026    | 1    | K.AAEIFSNPK.V        | iTRAP      | Viridiplantae | Ludwig NR | 1.2 Da                 | 0.6 Da                  |
| CaM-263  | OSJNBb0085H1.1 protein                                | 421.76   | 841.5     | 841.43    | 0.07     | 0    | 50    | 0.0076   | 1    | K.GATVEAPR.E         | Qstar      | Viridiplantae | MSDB      | 100 ppm                | 0.4 Da                  |
| CaM-428  | Beta-1,3-glucanase                                    | 684.39   | 1366.77   | 1366.76   | 0.0086   | 0    | 80    | 3.40E-05 | 1    | R.NSNIQVLLDVPR.S     | iTRAP      | Viridiplantae | Ludwig NR | 1.2 Da                 | 0.6 Da                  |
| CaM-443  | Predicted protein                                     | 522.112  | 1042.21   | 1042.6    | -0.3938  | 0    | 53    | 0.012    | 1    | K.LAVAINDSLK.T       | iTRAP      | Viridiplantae | Ludwig NR | 1.2 Da                 | 0.6 Da                  |

# CaM-73

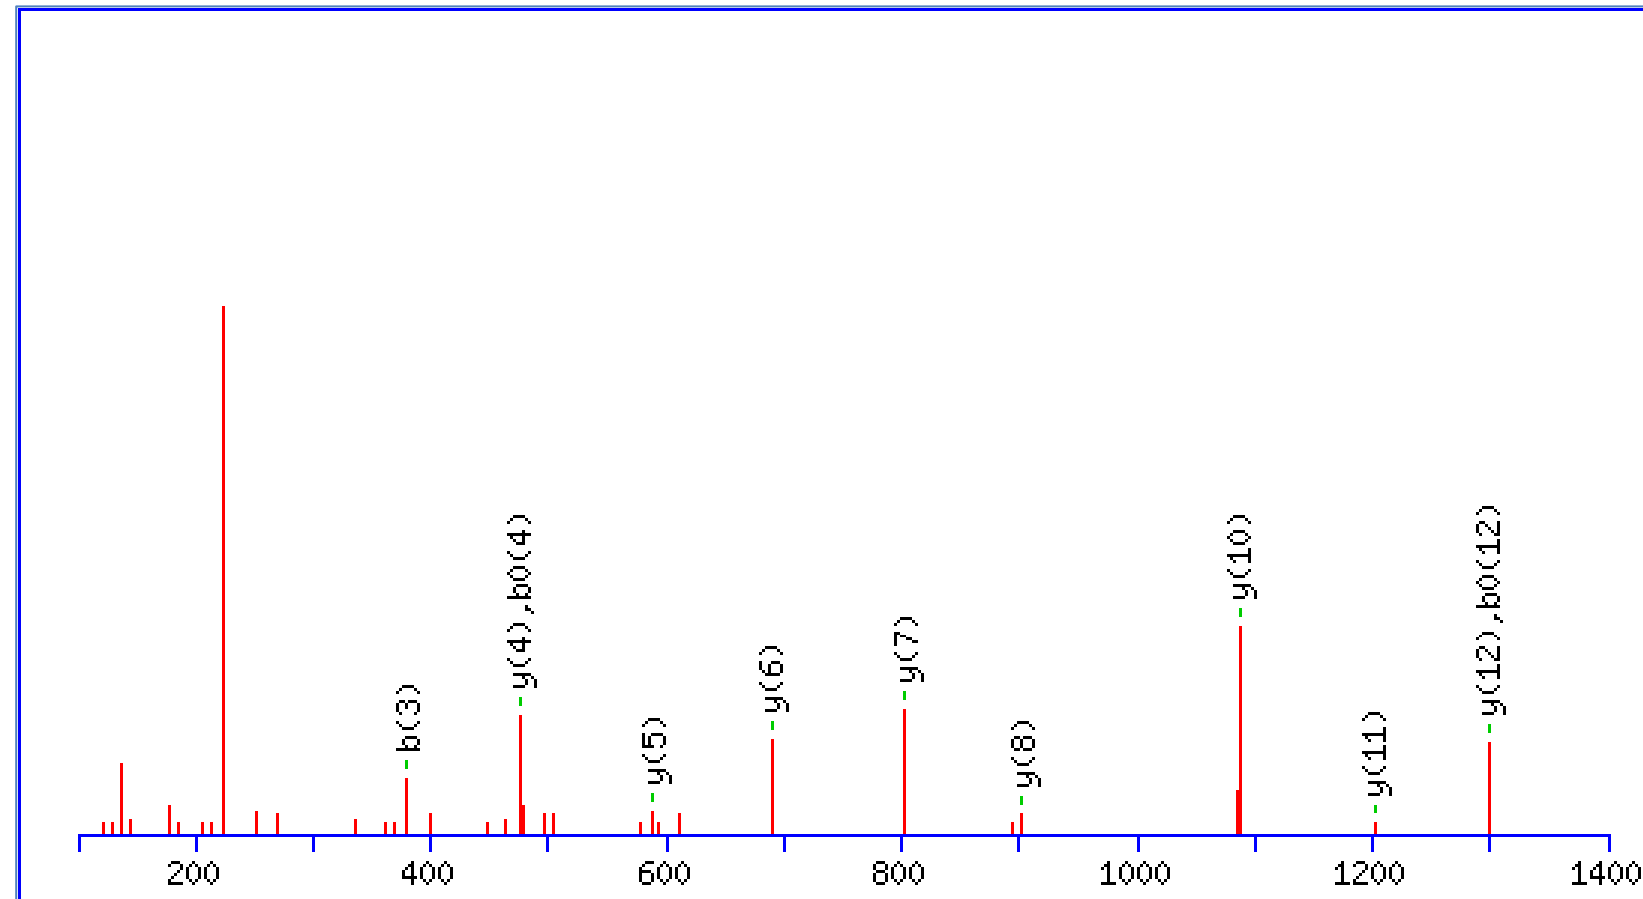

| #  | b               | b <sup>++</sup> | b <sup>*</sup> | b <sup>+++</sup> | b <sup>0</sup>   | b <sup>0++</sup> | Seq. | y                | y <sup>++</sup> | y <sup>*</sup> | y <sup>+++</sup> | y <sup>0</sup> | y <sup>0++</sup> | #  |
|----|-----------------|-----------------|----------------|------------------|------------------|------------------|------|------------------|-----------------|----------------|------------------|----------------|------------------|----|
| 1  | 88.0393         | 44.5233         |                |                  | 70.0287          | 35.518           | S    |                  |                 |                |                  |                |                  | 16 |
| 2  | 251.1026        | 126.055         |                |                  | 233.0921         | 117.0497         | Y    | 1703.8599        | 852.4336        | 1686.8333      | 843.9203         | 1685.849       | 843.4283         | 15 |
| 3  | <b>380.1452</b> | 190.5763        |                |                  | 362.1347         | 181.571          | E    | 1540.7966        | 770.9019        | 1523.77        | 762.3886         | 1522.786       | 761.8966         | 14 |
| 4  | 493.2293        | 247.1183        |                |                  | <b>475.2187</b>  | 238.113          | L    | 1411.754         | 706.3806        | 1394.7274      | 697.8673         | 1393.743       | 697.3753         | 13 |
| 5  | 590.2821        | 295.6447        |                |                  | 572.2715         | 286.6394         | P    | <b>1298.6699</b> | 649.8386        | 1281.6434      | 641.3253         | 1280.659       | 640.8333         | 12 |
| 6  | 705.309         | 353.1581        |                |                  | 687.2984         | 344.1529         | D    | <b>1201.6171</b> | 601.3122        | 1184.5906      | 592.7989         | 1183.607       | 592.3069         | 11 |
| 7  | 762.3305        | 381.6689        |                |                  | 744.3199         | 372.6636         | G    | <b>1086.5902</b> | 543.7987        | 1069.5636      | 535.2855         | 1068.58        | 534.7935         | 10 |
| 8  | 890.389         | 445.6982        | 873.3625       | 437.1849         | 872.3785         | 436.6929         | Q    | 1029.5687        | 515.288         | 1012.5422      | 506.7747         | 1011.558       | 506.2827         | 9  |
| 9  | 989.4575        | 495.2324        | 972.4309       | 486.7191         | 971.4469         | 486.2271         | V    | <b>901.5102</b>  | 451.2587        | 884.4836       | 442.7454         | 883.4996       | 442.2534         | 8  |
| 10 | 1102.542        | 551.7744        | 1085.515       | 543.2611         | 1084.531         | 542.7691         | I    | <b>802.4417</b>  | 401.7245        | 785.4152       | 393.2112         | 784.4312       | 392.7192         | 7  |
| 11 | 1203.589        | 602.2982        | 1186.563       | 593.785          | 1185.5786        | 593.293          | T    | <b>689.3577</b>  | 345.1825        | 672.3311       | 336.6692         | 671.3471       | 336.1772         | 6  |
| 12 | 1316.673        | 658.8403        | 1299.647       | 650.327          | <b>1298.6627</b> | 649.835          | I    | <b>588.31</b>    | 294.6586        | 571.2835       | 286.1454         | 570.2994       | 285.6534         | 5  |
| 13 | 1373.695        | 687.351         | 1356.668       | 678.8377         | 1355.6842        | 678.3457         | G    | <b>475.2259</b>  | 238.1166        | 458.1994       | 229.6033         | 457.2154       | 229.1113         | 4  |
| 14 | 1487.738        | 744.3725        | 1470.711       | 735.8592         | 1469.7271        | 735.3672         | N    | 418.2045         | 209.6059        | 401.1779       | 201.0926         | 400.1939       | 200.6006         | 3  |
| 15 | 1616.78         | 808.8938        | 1599.754       | 800.3805         | 1598.7697        | 799.8885         | E    | 304.1615         | 152.5844        | 287.135        | 144.0711         | 286.151        | 143.5791         | 2  |
| 16 |                 |                 |                |                  |                  |                  | R    | 175.119          | 88.0631         | 158.0924       | 79.5498          |                |                  | 1  |

# CaM-182

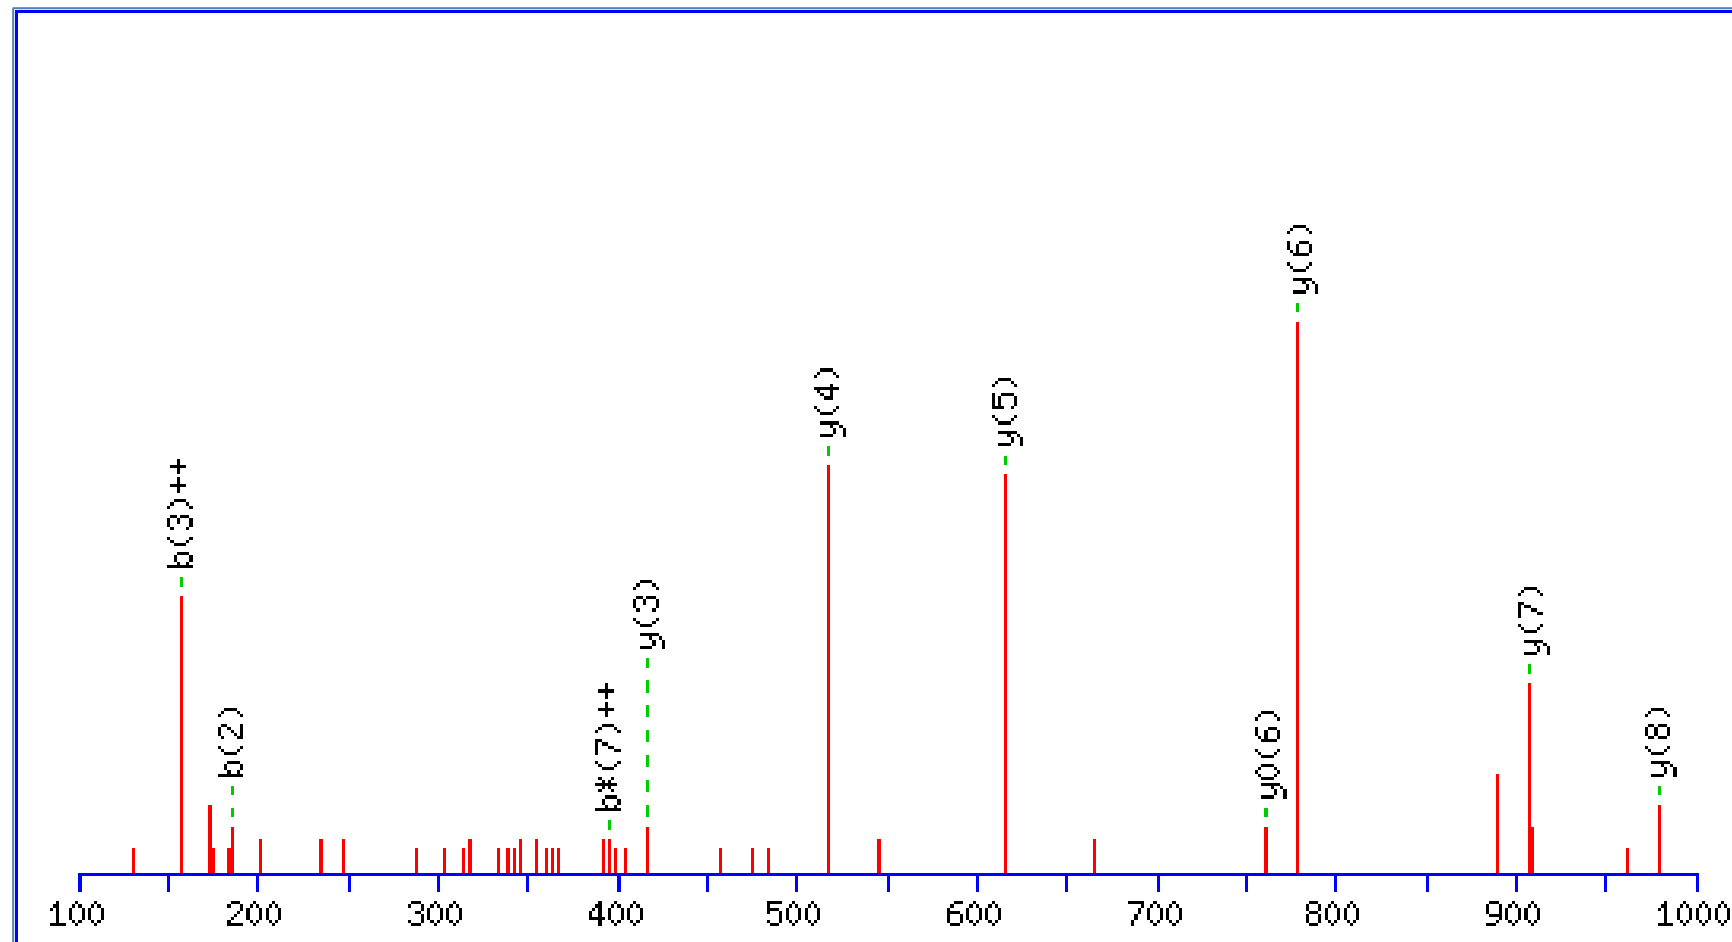

| # | b        | b <sup>++</sup> | b <sup>*</sup> | b <sup>+++</sup> | b <sup>0</sup> | b <sup>0++</sup> | Seq. | y        | y <sup>++</sup> | y <sup>*</sup> | y <sup>+++</sup> | y <sup>0</sup> | y <sup>0++</sup> | # |
|---|----------|-----------------|----------------|------------------|----------------|------------------|------|----------|-----------------|----------------|------------------|----------------|------------------|---|
| 1 | 114.0913 | 57.5493         |                |                  |                |                  | I    |          |                 |                |                  |                |                  | 9 |
| 2 | 185.1285 | 93.0679         |                |                  |                |                  | A    | 979.5207 | 490.264         | 962.4942       | 481.7507         | 961.5102       | 481.2587         | 8 |
| 3 | 314.171  | 157.5892        |                |                  | 296.1605       | 148.5839         | E    | 908.4836 | 454.7454        | 891.4571       | 446.2322         | 890.473        | 445.7402         | 7 |
| 4 | 477.2344 | 239.1208        |                |                  | 459.2238       | 230.1155         | Y    | 779.441  | 390.2241        | 762.4145       | 381.7109         | 761.4305       | 381.2189         | 6 |
| 5 | 576.3028 | 288.655         |                |                  | 558.2922       | 279.6498         | V    | 616.3777 | 308.6925        | 599.3511       | 300.1792         | 598.3671       | 299.6872         | 5 |
| 6 | 677.3505 | 339.1789        |                |                  | 659.3399       | 330.1736         | T    | 517.3093 | 259.1583        | 500.2827       | 250.645          | 499.2987       | 250.153          | 4 |
| 7 | 805.409  | 403.2082        | 788.3825       | 394.6949         | 787.3985       | 394.2029         | Q    | 416.2616 | 208.6344        | 399.235        | 200.1212         |                |                  | 3 |
| 8 | 918.4931 | 459.7502        | 901.4666       | 451.2369         | 900.4825       | 450.7449         | L    | 288.203  | 144.6051        | 271.1765       | 136.0919         |                |                  | 2 |
| 9 |          |                 |                |                  |                |                  | R    | 175.119  | 88.0631         | 158.0924       | 79.5498          |                |                  | 1 |

# CaM-214

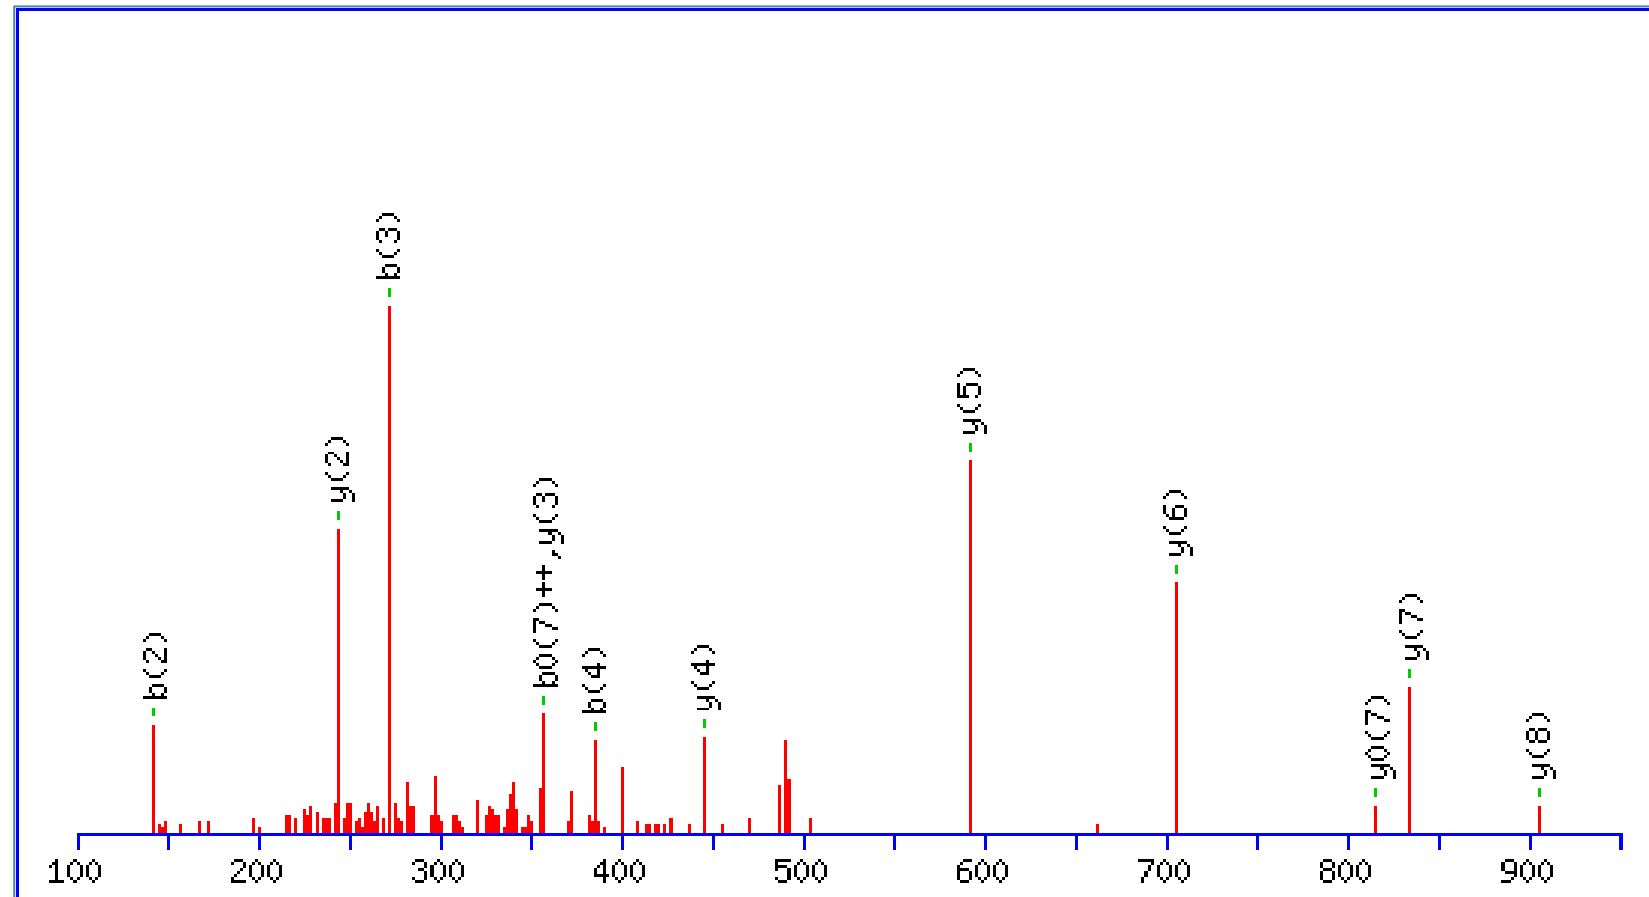

| # | b      | b <sup>++</sup> | b <sup>+</sup> | b <sup>+++</sup> | b <sup>0</sup> | b <sup>0++</sup> | Seq. | y      | y <sup>++</sup> | y <sup>*</sup> | y <sup>+++</sup> | y <sup>0</sup> | y <sup>0++</sup> | # |
|---|--------|-----------------|----------------|------------------|----------------|------------------|------|--------|-----------------|----------------|------------------|----------------|------------------|---|
| 1 | 72.04  | 36.53           |                |                  |                |                  | A    |        |                 |                |                  |                |                  | 9 |
| 2 | 143.08 | 72.04           |                |                  |                |                  | A    | 905.47 | 453.24          | 888.45         | 444.73           | 887.46         | 444.23           | 8 |
| 3 | 272.12 | 136.57          |                |                  | 254.11         | 127.56           | E    | 834.44 | 417.72          | 817.41         | 409.21           | 816.43         | 408.72           | 7 |
| 4 | 385.21 | 193.11          |                |                  | 367.2          | 184.1            | I    | 705.39 | 353.2           | 688.37         | 344.69           | 687.38         | 344.19           | 6 |
| 5 | 532.28 | 266.64          |                |                  | 514.27         | 257.64           | F    | 592.31 | 296.66          | 575.28         | 288.14           | 574.3          | 287.65           | 5 |
| 6 | 619.31 | 310.16          |                |                  | 601.3          | 301.15           | S    | 445.24 | 223.12          | 428.21         | 214.61           | 427.23         | 214.12           | 4 |
| 7 | 733.35 | 367.18          | 716.32         | 358.67           | 715.34         | 358.17           | N    | 358.21 | 179.61          | 341.18         | 171.09           |                |                  | 3 |
| 8 | 830.4  | 415.71          | 813.38         | 407.19           | 812.39         | 406.7            | P    | 244.17 | 122.59          | 227.14         | 114.07           |                |                  | 2 |
| 9 |        |                 |                |                  |                |                  | K    | 147.11 | 74.06           | 130.09         | 65.55            |                |                  | 1 |

# CaM-216

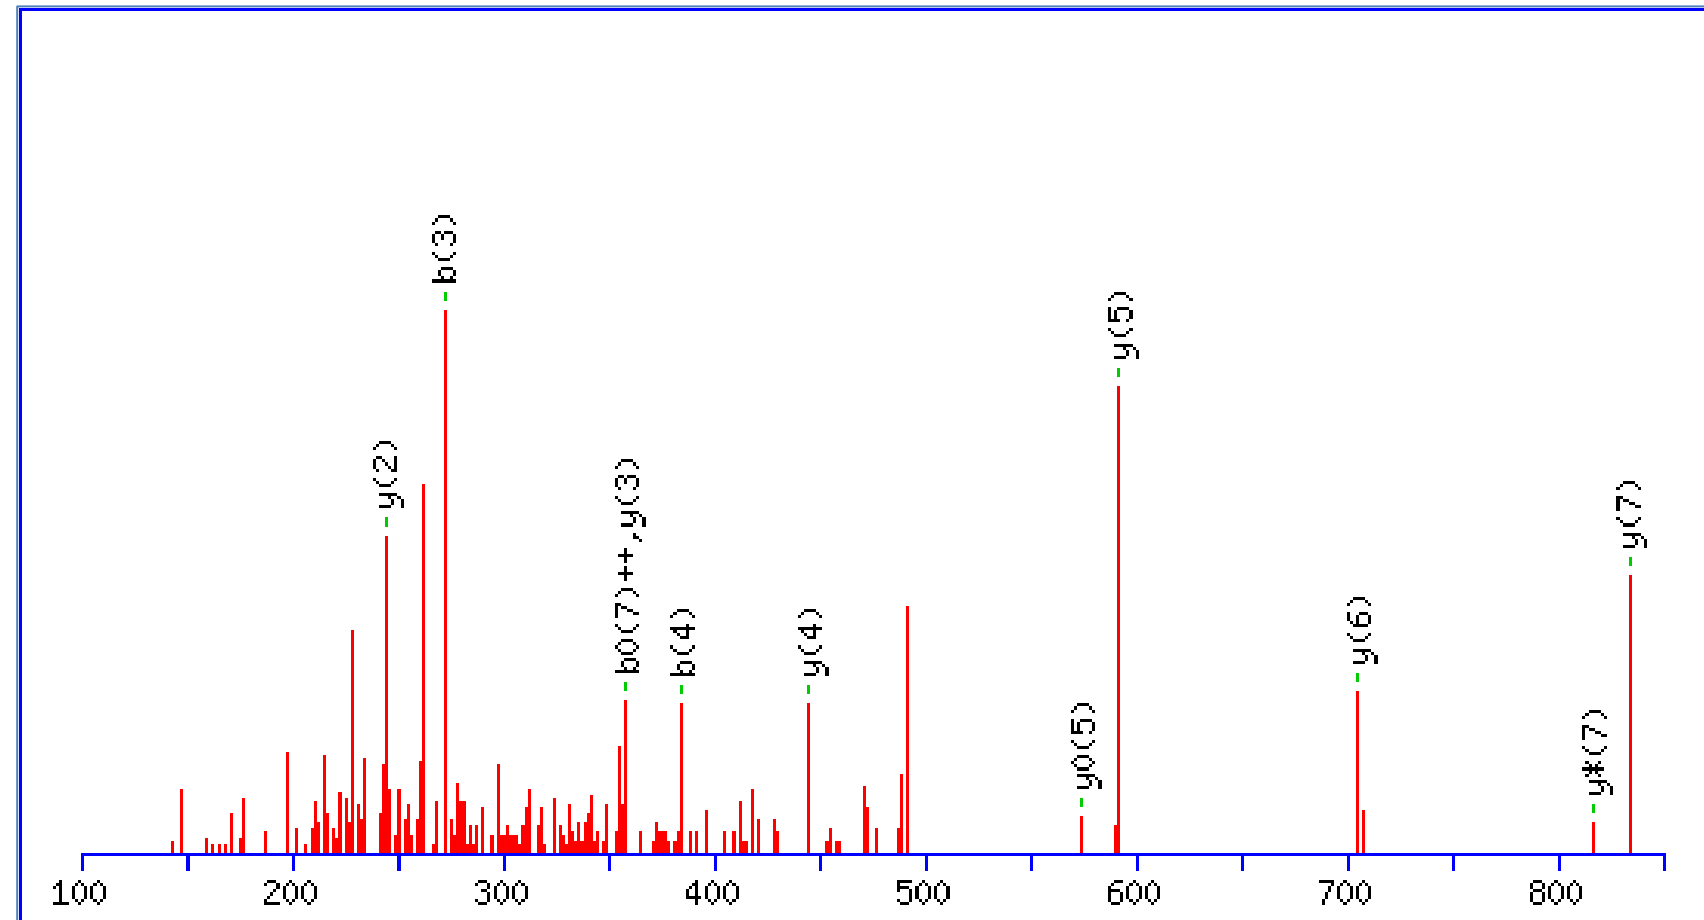

| # | b      | b <sup>++</sup> | b <sup>*</sup> | b <sup>+++</sup> | b <sup>0</sup> | b <sup>0++</sup> | Seq. | y      | y <sup>++</sup> | y <sup>*</sup> | y <sup>+++</sup> | y <sup>0</sup> | y <sup>0++</sup> | # |
|---|--------|-----------------|----------------|------------------|----------------|------------------|------|--------|-----------------|----------------|------------------|----------------|------------------|---|
| 1 | 72.04  | 36.53           |                |                  |                |                  | A    |        |                 |                |                  |                |                  | 9 |
| 2 | 143.08 | 72.04           |                |                  |                |                  | A    | 905.47 | 453.24          | 888.45         | 444.73           | 887.46         | 444.23           | 8 |
| 3 | 272.12 | 136.57          |                |                  | 254.11         | 127.56           | E    | 834.44 | 417.72          | 817.41         | 409.21           | 816.43         | 408.72           | 7 |
| 4 | 385.21 | 193.11          |                |                  | 367.2          | 184.1            | I    | 705.39 | 353.2           | 688.37         | 344.69           | 687.38         | 344.19           | 6 |
| 5 | 532.28 | 266.64          |                |                  | 514.27         | 257.64           | F    | 592.31 | 296.66          | 575.28         | 288.14           | 574.3          | 287.65           | 5 |
| 6 | 619.31 | 310.16          |                |                  | 601.3          | 301.15           | S    | 445.24 | 223.12          | 428.21         | 214.61           | 427.23         | 214.12           | 4 |
| 7 | 733.35 | 367.18          | 716.32         | 358.67           | 715.34         | 358.17           | N    | 358.21 | 179.61          | 341.18         | 171.09           |                |                  | 3 |
| 8 | 830.4  | 415.71          | 813.38         | 407.19           | 812.39         | 406.7            | P    | 244.17 | 122.59          | 227.14         | 114.07           |                |                  | 2 |
| 9 |        |                 |                |                  |                |                  | K    | 147.11 | 74.06           | 130.09         | 65.55            |                |                  | 1 |

# CaM-218

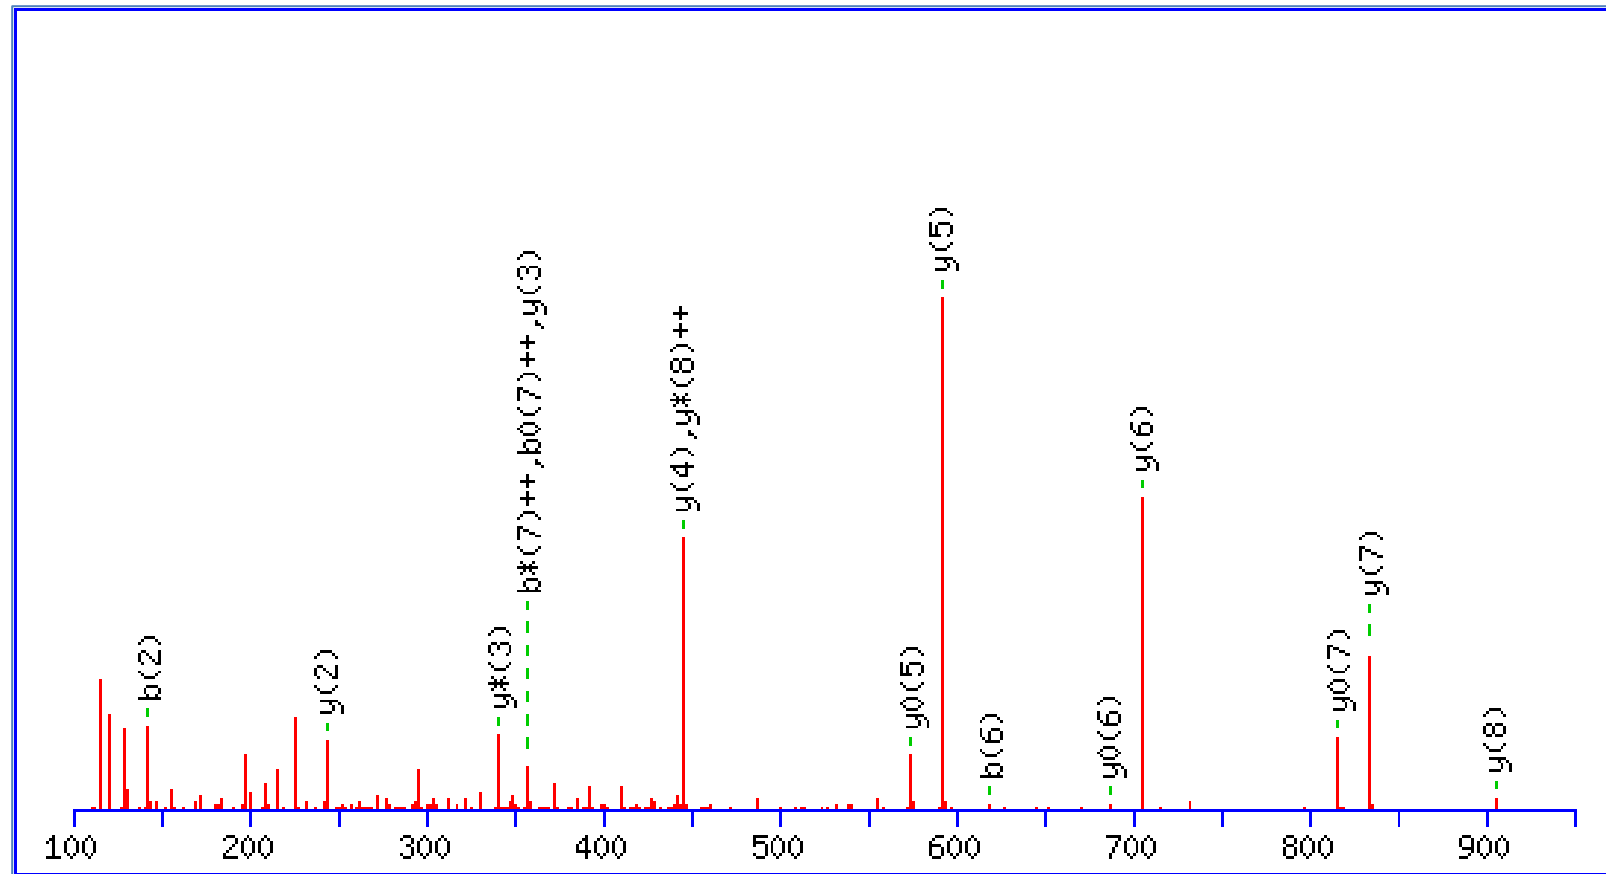

| # | b        | b <sup>++</sup> | b <sup>*</sup> | b <sup>+++</sup> | b <sup>0</sup> | b <sup>0++</sup> | Seq. | y        | y <sup>++</sup> | y <sup>*</sup> | y <sup>+++</sup> | y <sup>0</sup> | y <sup>0++</sup> | # |
|---|----------|-----------------|----------------|------------------|----------------|------------------|------|----------|-----------------|----------------|------------------|----------------|------------------|---|
| 1 | 72.0444  | 36.5258         |                |                  |                |                  | A    |          |                 |                |                  |                |                  | 9 |
| 2 | 143.0815 | 72.0444         |                |                  |                |                  | A    | 905.4727 | 453.24          | 888.4462       | 444.7267         | 887.4621       | 444.2347         | 8 |
| 3 | 272.1241 | 136.5657        |                |                  | 254.1135       | 127.5604         | E    | 834.4356 | 417.7214        | 817.409        | 409.2082         | 816.425        | 408.7162         | 7 |
| 4 | 385.2082 | 193.1077        |                |                  | 367.1976       | 184.1024         | I    | 705.393  | 353.2001        | 688.3665       | 344.6869         | 687.3824       | 344.1949         | 6 |
| 5 | 532.2766 | 266.6419        |                |                  | 514.266        | 257.6366         | F    | 592.3089 | 296.6581        | 575.2824       | 288.1448         | 574.2984       | 287.6528         | 5 |
| 6 | 619.3086 | 310.1579        |                |                  | 601.298        | 301.1527         | S    | 445.2405 | 223.1239        | 428.214        | 214.6106         | 427.23         | 214.1186         | 4 |
| 7 | 733.3515 | 367.1794        | 716.325        | 358.6661         | 715.341        | 358.1741         | N    | 358.2085 | 179.6079        | 341.1819       | 171.0946         |                |                  | 3 |
| 8 | 830.4043 | 415.7058        | 813.3777       | 407.1925         | 812.3937       | 406.7005         | P    | 244.1656 | 122.5864        | 227.139        | 114.0731         |                |                  | 2 |
| 9 |          |                 |                |                  |                |                  | K    | 147.1128 | 74.06           | 130.0863       | 65.5468          |                |                  | 1 |

# CaM-263

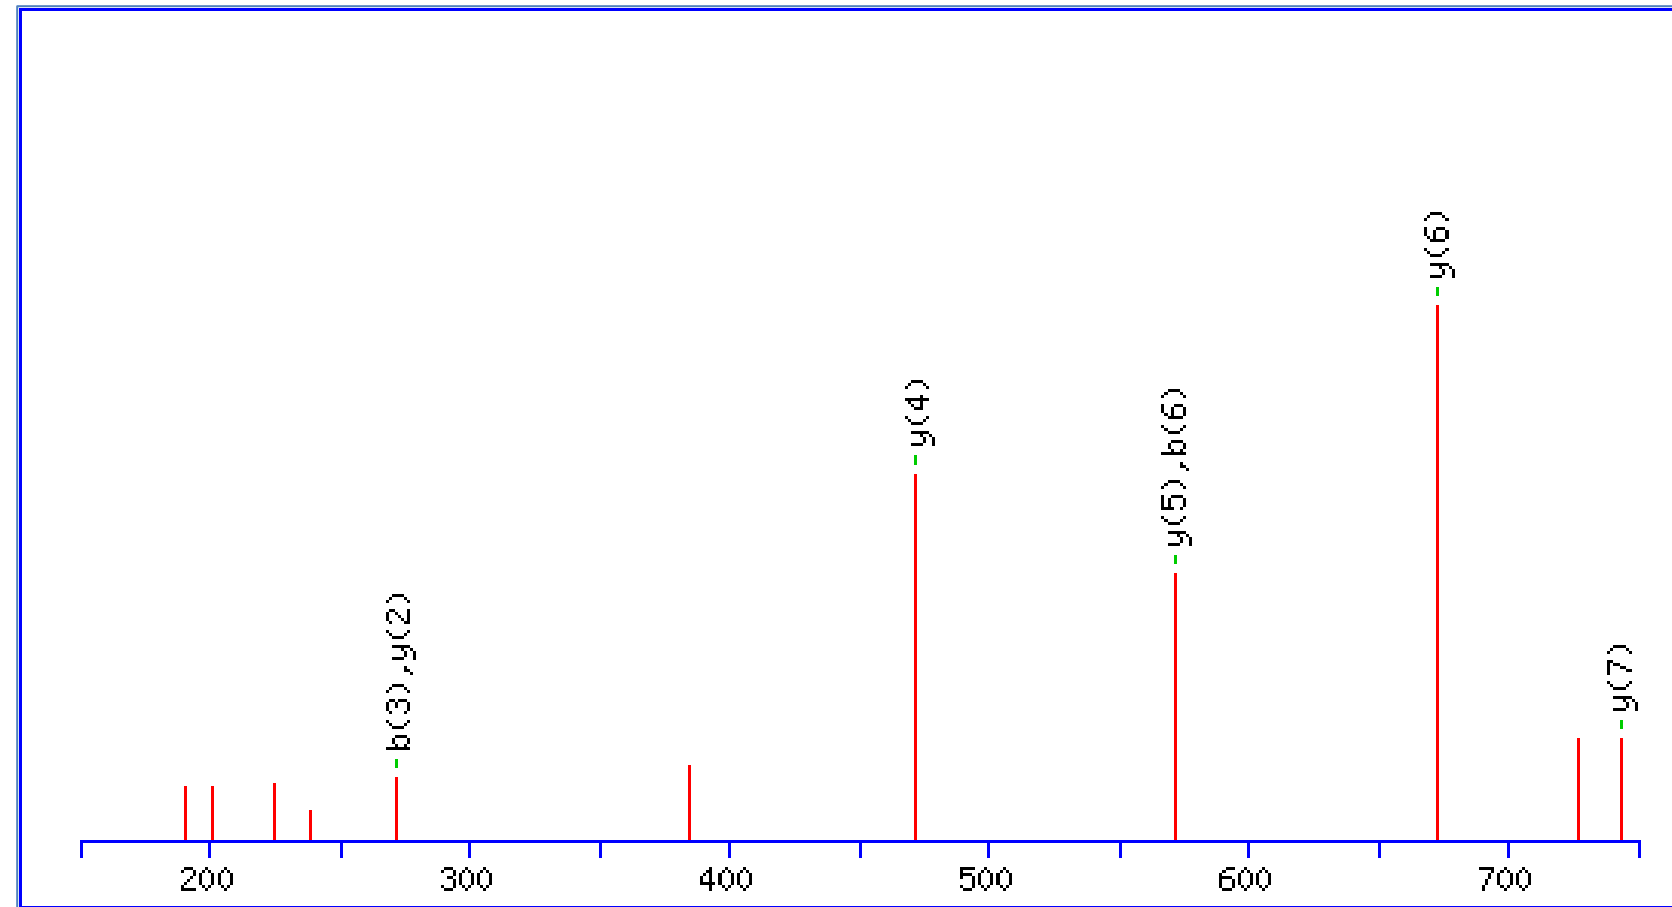

| # | b      | b <sup>++</sup> | b <sup>0</sup> | b <sup>0++</sup> | Seq. | y      | y <sup>++</sup> | y <sup>*</sup> | y <sup>+++</sup> | y <sup>0</sup> | y <sup>0++</sup> | # |
|---|--------|-----------------|----------------|------------------|------|--------|-----------------|----------------|------------------|----------------|------------------|---|
| 1 | 100.04 | 50.52           |                |                  | G    |        |                 |                |                  |                |                  | 8 |
| 2 | 171.08 | 86.04           |                |                  | A    | 743.4  | 372.21          | 726.38         | 363.69           | 725.39         | 363.2            | 7 |
| 3 | 272.12 | 136.57          | 254.11         | 127.56           | T    | 672.37 | 336.69          | 655.34         | 328.17           | 654.36         | 327.68           | 6 |
| 4 | 371.19 | 186.1           | 353.18         | 177.09           | V    | 571.32 | 286.16          | 554.29         | 277.65           | 553.31         | 277.16           | 5 |
| 5 | 500.24 | 250.62          | 482.22         | 241.62           | E    | 472.25 | 236.63          | 455.22         | 228.12           | 454.24         | 227.62           | 4 |
| 6 | 571.27 | 286.14          | 553.26         | 277.13           | A    | 343.21 | 172.11          | 326.18         | 163.59           |                |                  | 3 |
| 7 | 668.32 | 334.67          | 650.31         | 325.66           | P    | 272.17 | 136.59          | 255.15         | 128.08           |                |                  | 2 |
| 8 |        |                 |                |                  | R    | 175.12 | 88.06           | 158.09         | 79.55            |                |                  | 1 |

# CaM-428

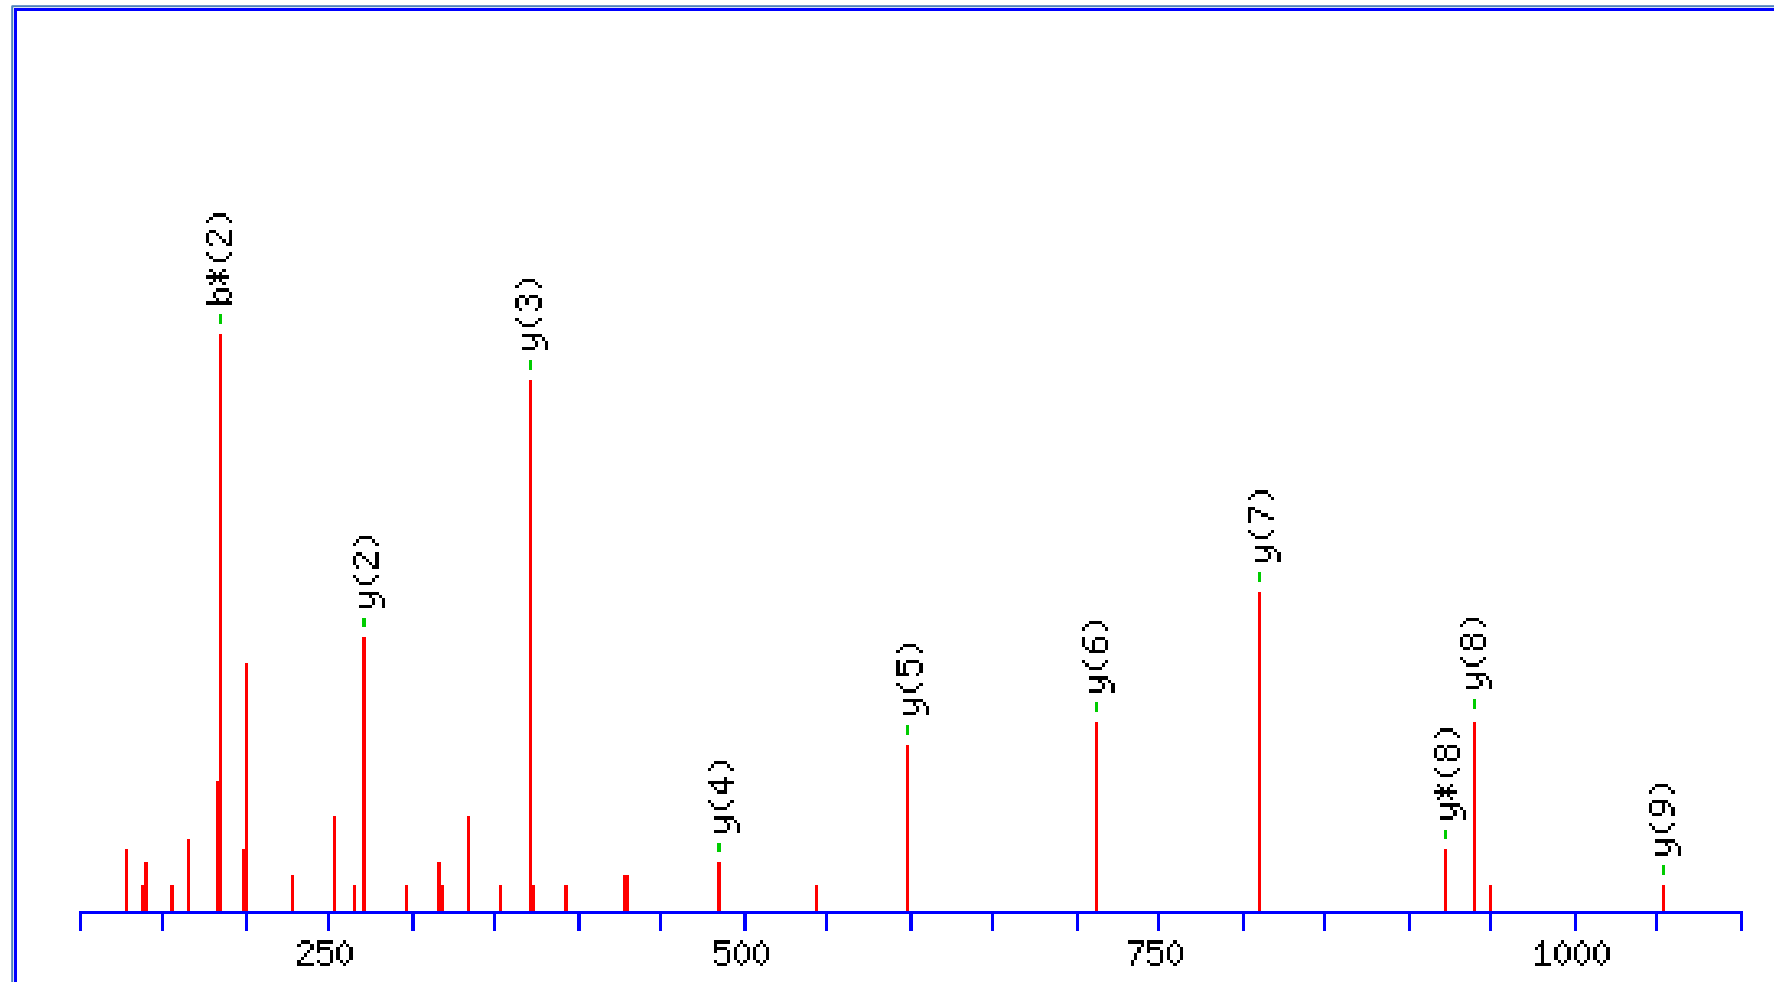

| #  | b        | b <sup>++</sup> | b <sup>*</sup> | b <sup>+++</sup> | b <sup>0</sup> | b <sup>0++</sup> | Seq. | y         | y <sup>++</sup> | y <sup>*</sup> | y <sup>+++</sup> | y <sup>0</sup> | y <sup>0++</sup> | #  |
|----|----------|-----------------|----------------|------------------|----------------|------------------|------|-----------|-----------------|----------------|------------------|----------------|------------------|----|
| 1  | 115.0502 | 58.0287         | 98.0237        | 49.5155          |                |                  | N    |           |                 |                |                  |                |                  | 12 |
| 2  | 202.0822 | 101.5448        | 185.0557       | 93.0315          | 184.0717       | 92.5395          | S    | 1253.7212 | 627.3642        | 1236.6947      | 618.851          | 1235.711       | 618.359          | 11 |
| 3  | 316.1252 | 158.5662        | 299.0986       | 150.0529         | 298.1146       | 149.5609         | N    | 1166.6892 | 583.8482        | 1149.6626      | 575.335          | 1148.679       | 574.8429         | 10 |
| 4  | 429.2092 | 215.1082        | 412.1827       | 206.595          | 411.1987       | 206.103          | I    | 1052.6463 | 526.8268        | 1035.6197      | 518.3135         | 1034.636       | 517.8215         | 9  |
| 5  | 557.2678 | 279.1375        | 540.2413       | 270.6243         | 539.2572       | 270.1323         | Q    | 939.5622  | 470.2847        | 922.5356       | 461.7715         | 921.5516       | 461.2795         | 8  |
| 6  | 656.3362 | 328.6717        | 639.3097       | 320.1585         | 638.3256       | 319.6665         | V    | 811.5036  | 406.2554        | 794.4771       | 397.7422         | 793.4931       | 397.2502         | 7  |
| 7  | 769.4203 | 385.2138        | 752.3937       | 376.7005         | 751.4097       | 376.2085         | L    | 712.4352  | 356.7212        | 695.4087       | 348.208          | 694.4246       | 347.716          | 6  |
| 8  | 882.5043 | 441.7558        | 865.4778       | 433.2425         | 864.4938       | 432.7505         | L    | 599.3511  | 300.1792        | 582.3246       | 291.6659         | 581.3406       | 291.1739         | 5  |
| 9  | 997.5313 | 499.2693        | 980.5047       | 490.756          | 979.5207       | 490.264          | D    | 486.2671  | 243.6372        | 469.2405       | 235.1239         | 468.2565       | 234.6319         | 4  |
| 10 | 1096.6   | 548.8035        | 1079.573       | 540.2902         | 1078.5891      | 539.7982         | V    | 371.2401  | 186.1237        | 354.2136       | 177.6104         |                |                  | 3  |
| 11 | 1193.653 | 597.3299        | 1176.626       | 588.8166         | 1175.6419      | 588.3246         | P    | 272.1717  | 136.5895        | 255.1452       | 128.0762         |                |                  | 2  |
| 12 |          |                 |                |                  |                |                  | R    | 175.119   | 88.0631         | 158.0924       | 79.5498          |                |                  | 1  |



# CaM-443

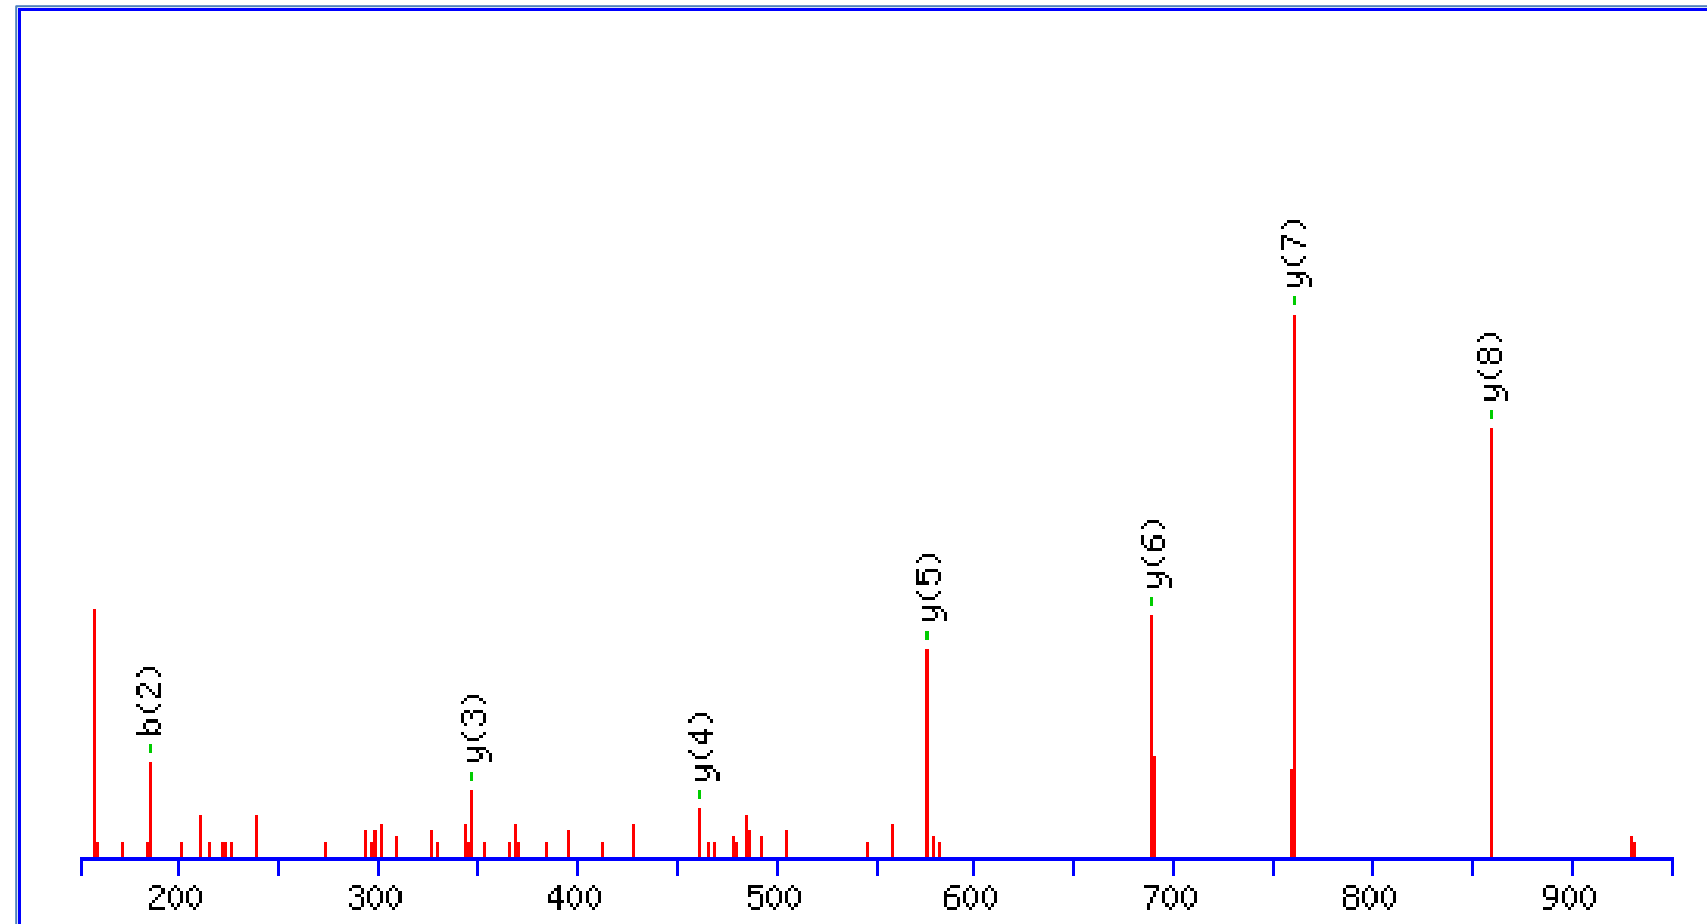

| #  | b        | b <sup>++</sup> | b <sup>+</sup> | b <sup>+++</sup> | b <sup>0</sup> | b <sup>0++</sup> | Seq. | y        | y <sup>++</sup> | y <sup>+</sup> | y <sup>+++</sup> | y <sup>0</sup> | y <sup>0++</sup> | #  |
|----|----------|-----------------|----------------|------------------|----------------|------------------|------|----------|-----------------|----------------|------------------|----------------|------------------|----|
| 1  | 114.0913 | 57.5493         |                |                  |                |                  | L    |          |                 |                |                  |                |                  | 10 |
| 2  | 185.1285 | 93.0679         |                |                  |                |                  | A    | 930.5255 | 465.7664        | 913.4989       | 457.2531         | 912.5149       | 456.7611         | 9  |
| 3  | 284.1969 | 142.6021        |                |                  |                |                  | V    | 859.4884 | 430.2478        | 842.4618       | 421.7345         | 841.4778       | 421.2425         | 8  |
| 4  | 355.234  | 178.1206        |                |                  |                |                  | A    | 760.4199 | 380.7136        | 743.3934       | 372.2003         | 742.4094       | 371.7083         | 7  |
| 5  | 468.318  | 234.6627        |                |                  |                |                  | I    | 689.3828 | 345.1951        | 672.3563       | 336.6818         | 671.3723       | 336.1898         | 6  |
| 6  | 582.361  | 291.6841        | 565.3344       | 283.1709         |                |                  | N    | 576.2988 | 288.653         | 559.2722       | 280.1397         | 558.2882       | 279.6477         | 5  |
| 7  | 697.3879 | 349.1976        | 680.3614       | 340.6843         | 679.3774       | 340.1923         | D    | 462.2558 | 231.6316        | 445.2293       | 223.1183         | 444.2453       | 222.6263         | 4  |
| 8  | 810.472  | 405.7396        | 793.4454       | 397.2264         | 792.4614       | 396.7343         | L    | 347.2289 | 174.1181        | 330.2023       | 165.6048         | 329.2183       | 165.1128         | 3  |
| 9  | 897.504  | 449.2556        | 880.4775       | 440.7424         | 879.4934       | 440.2504         | S    | 234.1448 | 117.5761        | 217.1183       | 109.0628         | 216.1343       | 108.5708         | 2  |
| 10 |          |                 |                |                  |                |                  | K    | 147.1128 | 74.06           | 130.0863       | 65.5468          |                |                  | 1  |

**Supplementary Table S9.** List of oligonucleotides primers used in this study.

| Primer Name    | Primer Sequences (5'- 3')          | Purpose                 |
|----------------|------------------------------------|-------------------------|
| CaMCh1-like1   | GAGCCTGGTGGTGCA GAATACAATTATGCTTC  | Cloning                 |
| CaMCh1-like2   | GTGGATGCTGTTGA GA GAATGCTGGA GG    | Cloning                 |
| CaSUN1UTRFP    | ACATGGGATTCTGAACTTGCATTCCTTC       | Cloning                 |
| CaSUN1IPF1     | CTTGGTCTTGATGAATTCAAG              | Sequencing              |
| CaSUN1IPF2     | GAGAGAATGCTGGA GGATTTG             | Sequencing              |
| CaSUN1IPF3     | ATTTTCAAAGAGTACAGCAAAG             | Sequencing              |
| CaSUN1YESFP    | GGATCCAAAAAATGCA GA GATCAC         | pYES2 cloning           |
| CaSUN1YESRP    | CTCGAGTAACTTAATATGAAAATAATAATG     | pYES2 cloning           |
| CaSUN1QRTUTRFP | TTCCAAGCAGGGTAATTAATGG             | qPCR                    |
| CaSUN1QRTUTRRP | ACGTGATCTCTGCATTGCACATA            | qPCR                    |
| CaQRTEF1LFP    | TCCACCACTTGGTCGTTTTG               | qPCR                    |
| CaQRTEF1LRP    | CTTAATGACACCGACA GCAACA G          | qPCR                    |
| CaSUN1QRTEFP   | TCCCGTCCGA GGCTTTATT               | qPCR                    |
| CaSUN1QRTRP    | TGACTCACCAACAAAACCATTAGC           | qPCR                    |
| CaSUN1GATEWFP  | CACCATGCA GA GATCACGTAAA GCTC      | pENTR cloning           |
| CaSUN1GATEWRP1 | CTATCATAAACTTAATATGAAAATAATAATGATA | pENTR cloning           |
| CaSUN1GATEWRP2 | TAAACTTAATATGAAAATAATAATGATACAAC   | pENTR cloning           |
| AtSUN3TDNALP   | AATCACAACCTGCAATAACCGC             | T-DNA mutant genotyping |
| AtSUN3TDNARP   | TCCAATTCTCGAAACAAATCG              | T-DNA mutant genotyping |
| LBb1.3         | ATTTTGCCGATTCGGAAC                 | T-DNA mutant genotyping |
| AtSUN3FP       | CACCATGCAAAGGTCGTGTA GAACTAG       | PCR                     |
| AtSUN3RP       | TCAAAGAGACAAAACGAACATAATGAATG      | PCR                     |
| AtACT1RTEFP    | AGTATTGTGGGTCTGCCTCG               | RT-PCR                  |
| AtACT1RTRP     | GAGCTGGT'TTTGGCTGTCTC              | RT-PCR                  |
| ScQRTEACT1FP   | GAGGTTGCTGCTTTGGTTATTGA            | qPCR                    |
| ScQRTEACT1RP   | CGTCGTCA CCGGCAAAC                 | qPCR                    |
| ScQRTSLP1FP    | GCACGAA GCAAAGTTCA GTCAT           | qPCR                    |
| ScQRTSLP1RP    | TGGCAAAGTTATTCA GCA GATCTAGA       | qPCR                    |
| ScQRTEKAR2FP   | TCCAAGGTCGTTATCCAATTAC             | qPCR                    |
| ScQRTEKAR2RP   | CAGCGGCA CCA GAACCA                | qPCR                    |
